# Supplementary material for: Sleep duration and multimorbidity in Luxembourg: results from the European Health Examination Survey in Luxembourg, 2013–2015
Source: PubMed Central journal article supplement — BMJ Open. 2019 Aug 21;9(8):e026942. doi: 10.1136/bmjopen-2018-026942 (PMC6707670; doi:10.1136/bmjopen-2018-026942), 2019-08-21
Supplement: bmjopen-2018-026942.draft_revisions.pdf [file bmjopen-2018-026942.draft_revisions.pdf]

# BMJ Open

BMJ Open is committed to open peer review. As part of this commitment we make the peer review history of every article we publish publicly available.

When an article is published we post the peer reviewers' comments and the authors' responses online. We also post the versions of the paper that were used during peer review. These are the versions that the peer review comments apply to.

The versions of the paper that follow are the versions that were submitted during the peer review process. They are not the versions of record or the final published versions. They should not be cited or distributed as the published version of this manuscript.

BMJ Open is an open access journal and the full, final, typeset and author-corrected version of record of the manuscript is available on our site with no access controls, subscription charges or pay-per-view fees (<http://bmjopen.bmj.com>).

If you have any questions on BMJ Open's open peer review process please email [info.bmjopen@bmj.com](mailto:info.bmjopen@bmj.com)

# BMJ Open

## SLEEP DURATION AND MULTIMORBIDITY IN LUXEMBOURG. RESULTS FROM THE EUROPEAN HEALTH EXAMINATION SURVEY, 2013-2015

|                               |                                                                                                                                                                                                                                                                                                                                                                                                                                                                                                                                                                                                                                                                                                                                          |
|-------------------------------|------------------------------------------------------------------------------------------------------------------------------------------------------------------------------------------------------------------------------------------------------------------------------------------------------------------------------------------------------------------------------------------------------------------------------------------------------------------------------------------------------------------------------------------------------------------------------------------------------------------------------------------------------------------------------------------------------------------------------------------|
| Journal:                      | <i>BMJ Open</i>                                                                                                                                                                                                                                                                                                                                                                                                                                                                                                                                                                                                                                                                                                                          |
| Manuscript ID                 | bmjopen-2018-026942                                                                                                                                                                                                                                                                                                                                                                                                                                                                                                                                                                                                                                                                                                                      |
| Article Type:                 | Research                                                                                                                                                                                                                                                                                                                                                                                                                                                                                                                                                                                                                                                                                                                                 |
| Date Submitted by the Author: | 28-Sep-2018                                                                                                                                                                                                                                                                                                                                                                                                                                                                                                                                                                                                                                                                                                                              |
| Complete List of Authors:     | Ruiz-Castell, Maria; Luxembourg Institute of Health, Epidemiology and Public Health Research Unit, Department of Population Health<br>Makovski, Tatjana; Luxembourg Institute of Health, Epidemiology and Public Health Research Unit, Department of Population Health; Care and Public Health Research Institute, Maastricht University, Department of Family medicine<br>Bocquet, Valéry; Luxembourg Institute of Health, Competence Center in Methodology and Statistics, Department of Population Health<br>Stranges, Saverio; , Schulich School of Medicine & Dentistry, Western University, Department of Epidemiology & Biostatistics; Schulich School of Medicine & Dentistry, Western University, Department of Family Medicine |
| Keywords:                     | EPIDEMIOLOGY, PUBLIC HEALTH, SLEEP MEDICINE                                                                                                                                                                                                                                                                                                                                                                                                                                                                                                                                                                                                                                                                                              |
|                               |                                                                                                                                                                                                                                                                                                                                                                                                                                                                                                                                                                                                                                                                                                                                          |

SCHOLARONE™  
Manuscripts

1  
2  
3 **SLEEP DURATION AND MULTIMORBIDITY IN LUXEMBOURG. RESULTS FROM**  
4 **THE EUROPEAN HEALTH EXAMINATION SURVEY, 2013-2015**

5 Maria Ruiz-Castell, PhD<sup>1</sup>, Tatjana T. Makovski, MD<sup>1,2,3</sup>, Valéry Bocquet, PhD<sup>4</sup>, Saverio Stranges,  
6 MD, PhD<sup>1,5,6</sup>  
7

8  
9  
10 <sup>1</sup> Epidemiology and Public Health Research Unit, Department of Population Health, Luxembourg  
11 Institute of Health (LIH), Strassen, Luxembourg  
12

13 <sup>2</sup> Department of Family medicine, Care and Public Health Research Institute, Maastricht University,  
14 Maastricht, the Netherlands  
15

16  
17 <sup>3</sup> Chairgroup of Complex Genetics and Epidemiology, Care and Public Health Research Institute,  
18 Maastricht University, Maastricht, the Netherlands  
19

20  
21 <sup>4</sup> Competence Center in Methodology and Statistics, Department of Population Health,  
22 Luxembourg Institute of Health (LIH), Strassen, Luxembourg  
23

24  
25 <sup>5</sup> Department of Epidemiology & Biostatistics, Schulich School of Medicine & Dentistry, Western  
26 University, London, Ontario, Canada  
27

28  
29 <sup>6</sup> Department of Family Medicine, Schulich School of Medicine & Dentistry, Western University,  
30 London, Ontario, Canada  
31

32  
33  
34 **Corresponding author:** Maria Ruiz-Castell; Luxembourg Institute of Health, Department of  
35 Population Health. 1A-B, rue Thomas Edison, L-1445 Strassen. Luxembourg; [Maria.Ruiz@lih.lu](mailto:Maria.Ruiz@lih.lu);

36  
37 Telephone number: +352 26970-746  
38

39 Fax: +352 26970-719  
40  
41  
42  
43

44 **Word count:** 3163; **Abstract:** 207; **Tables:** 4; **References:** 40  
45

46 **Funding:** The study was funded by the Directorate and Ministry of Health and the Luxembourg  
47 Institute of Health.  
48  
49  
50

51 **Conflict of interest:** The authors declare that they have no conflict of interest.  
52  
53  
54  
55  
56  
57  
58  
59  
60

### **Contributorship statement**

MRC and SS conceptualized and designed the study. MRC and VB performed the statistical analysis. MRC, SS and T.T.M interpreted the data. MRC drafted the article. SS supervised the study. All authors participated in the revision of the article. All authors contributed to and have approved the final manuscript.

For peer review only

## Abstract

**Objectives:** We estimated the prevalence of short sleep duration and multimorbidity in Luxembourg, and assessed whether sleep duration was associated with multimorbidity after adjusting for socio-demographic and behavioral characteristics.

**Design:** Cross-sectional study.

**Participants:** Data from 1508 Luxembourg residents (48% men and 52% women) aged 25 to 64 years came from the European Health Examination Survey 2013-2015.

**Outcome measures:** Short sleep duration and multimorbidity.

**Results:** Participants reported sleeping 7.86hrs/night when not having to work the next day, nearly 1hr more than during work days. Nearly half of participants reported having been diagnosed with  $\geq 2$  chronic conditions/diseases. Short sleep duration was linearly associated with the number of chronic conditions when participants did not have work the next day (OR: 2.52, 95% CI: 1.44, 4.41 and OR: 2.78, 95% CI: 1.65, 4.68 for 2, and  $\geq 3$  chronic conditions/diseases, respectively), independently of socioeconomic and behavioral characteristics. The effect was stronger when participants had to work the next day (OR: 3.03, 95% CI: 1.34, 6.84, and OR: 3.46, 95% CI: 1.56, 7.66, for 2 and  $\geq 3$  chronic conditions/diseases, respectively).

**Conclusions:** Health promotion programs should aim at improving and promoting healthy sleeping and its possible benefits on chronic disease outcomes, which in turn can help reducing the risk of multimorbidity in middle-aged adults.

**Keywords:** Sleep duration; multimorbidity; chronic diseases; Luxembourg; European Health Examination Survey

### ***Strengths and limitations of this study***

- This is the first study in Luxembourg on the prevalence of sleep patterns, with a focus on short and long sleep duration, and their relationship with multimorbidity.
- Short sleep duration, difficulties in sleeping through the night, sleep disorders and sleeping medication, all are a public health challenges in Luxembourg.
- In the present study, short sleep duration was linearly associated with the number of chronic conditions
- As both sleep problems and multimorbidity are highly prevalent in Luxembourg, health promotion programs should be addressed to improve and promote healthy sleeping habits among the general population, which in turn may help reducing the risk of multimorbidity
- Limitations of the present study include the subjective measure of sleep duration, the cross-sectional design of the study (not allow to establish a causal link) and the low participation rate.

***Data sharing statement:*** Extra data can be accessed by emailing Dr Laetitia Huiart, Head of the Population Health Department, LIH (laetitia.huiart@lih.lu) and the Principal Investigator of EHES-LUX2013-2015, Dr Maria Ruiz-Castell (maria.ruiz@lih.lu) and fill out a request form.

## Introduction

A healthy lifestyle includes healthy sleep habits. Sleep patterns influence several physiological and psychological processes such as inflammation, cognitive function, glucose regulation and energy balance (1-3). Short sleep duration, poor sleep quality, and sleep-related disorders can result in sleep deficiency and impact on individual health (4). According to the Centers for Disease Control and Prevention (CDC), insufficient sleep is associated with health problems such as chronic diseases, poor quality of life, mental health, risk of accidents, and lower productivity at work (5). Adequate sleep duration is one of the dimensions needed for a good sleep health (6). The American Academy of Sleep Medicine and Sleep Research Society considers that for an adult it is recommended at least 7 hours of sleep per night (4). However, a high percentage of the population sleeps less than the recommended 7 hours (7).

Several factors may affect sleep such as physical activity or eating behaviors, but also socioeconomic factors including job status, marital status and ethnicity (8, 9). Studies have observed an association between lower education, unemployment and both short and long sleep duration (10, 11), while factors such as physical activity and healthy diet seem to improve sleep quality (12, 13). Moreover, diet intake (energy and total fat intake) and nutrients seem to be associated with both short and long sleep duration through multifactorial factors including behaviors (e.g., time and hours of intake) and variations in hormones related to appetite, such as leptin (14).

Epidemiologic data suggest an association between sleep duration and poor sleep quality with cardiometabolic health (e.g. hypertension, diabetes, obesity, cardiovascular diseases), mental problems (e.g. depression), and mortality (15-18). The observed relationship between short sleep duration and mortality would be especially critical in adults under 65 years of age (18). Few studies so far have focused on possible relationships between sleep patterns and multimorbidity (19, 20). Multimorbidity is defined as the presence of two or more chronic diseases in the same individual (21), and is associated with disability, functional decline, frailty, poor quality of life and mortality (22). In the context of ageing societies, multimorbidity is an increasing global phenomenon (23); although its occurrence usually increases with age, a large proportion of individuals younger than 65 are also affected (24). Definitions of multimorbidity vary, however, and the prevalence differs based on changing definitions, which in turn present significant challenges when attempting to compare results between populations and studies (22).

1  
2  
3 The aim of the present study was to estimate the prevalence of short sleep duration and  
4 multimorbidity in Luxembourg, as well as to assess whether sleep duration was associated with  
5 multimorbidity after adjusting for socio-demographic and behavioral characteristics.  
6  
7

## 8 **Methods**

### 9 *Study population and recruitment*

10  
11 Data was drawn from the European Health Examination Survey in Luxembourg (EHES-LUX).  
12  
13 EHES-LUX is a representative cross-sectional population-based survey carried out by the  
14 Luxembourg Institute of Health with the objectives of assessing the health status of the population  
15 of the Grand-Duchy of Luxembourg, develop national and European health indicators, identify the  
16 needs of the population, and evaluate health behaviors. EHES-LUX was conducted between  
17 February 2013 and January 2015. Individuals were randomly selected in a one-stage sampling  
18 procedure from the national health insurance registry (95% social coverage). Institutionalized  
19 individuals (e.g. hospitals, elderly homes) were not included. A total of 1508 residents (excluding  
20 21 pregnant women) of Luxembourg aged 25 to 64 participated in the survey (participation rate of  
22 24.1%) (25). Of them, 7 participants did not reported their sleep habits. A total of 1501 participants  
23 had information on multimorbidity and sleep habits. Participants signed an informed consent and  
24 were interviewed by trained nurses who also conducted medical examinations. Questionnaires  
25 included several health modules (e.g. sleep habits, nutritional habits, health care, working and living  
26 conditions) as well as demographic and socioeconomic characteristics. Medical examinations  
27 included measurements such as blood pressure and anthropometry. Sampling weights were  
28 calculated to be generalized to the population of Luxembourg in terms of age, sex and district of  
29 residence. The study national research ethics committee (Comité national d'éthique de Recherche-  
30 CNER) approved the study and it was notified to the Luxemburgish National Commission for Data  
31 Protection.  
32  
33  
34  
35  
36  
37  
38  
39  
40  
41  
42

### 43 *Patient involvement*

44  
45 Participants were not involved in the development of the research question, study design,  
46 recruitment or the conduction of the study. Upon request, results from the medical examination  
47 were forwarded to the study participants and their medical doctors. General results were presented  
48 to the general public in national health activities  
49  
50

### 51 *Sleep*

52  
53 Sleep duration was assessed using two questions: 1) "How many hours do you normally sleep at  
54 night when you have to work the next day?", and 2) "How many hours do you normally sleep at  
55  
56  
57  
58  
59  
60



1  
2  
3 night when you don't have to work the next day?". Responses to the first question were categorized  
4 in short sleep duration (<6hrs/night), medium sleep duration (6-7hrs/night), and long sleep duration  
5 (>7hrs/night), in line with most of previously published studies. Responses to the second question  
6 were categorized in short sleep duration (<7hrs/night), medium sleep duration (7-8hrs/night), and  
7 long sleep duration (>8hrs/night) .  
8

9  
10  
11 Difficulty in sleeping the night was assessed based on the question "Do you have difficulties in  
12 sleeping through the night?". Diagnosis of sleep disorders was assessed using the question "Have  
13 you ever been told by a doctor or another health professional that you have a sleep disorder?".  
14

15  
16 Sleep medication was assessed using the question "In the past 2 weeks, have you used other types  
17 of medicines that were prescribed to you, such as sleeping tablets?". Sleepiness was defined as a  
18 score of  $\geq 11$  on the Epworth Sleepiness Scale (26).  
19

### 20 21 *Multimorbidity*

22  
23 Participants were asked if they ever had a chronic disease or condition diagnosed by a medical  
24 doctor (e.g., hypertension, high cholesterol, diabetes, coronary heart disease or angina pectoris,  
25 heart attack or its chronic consequences, stroke or its chronic consequences, stomach or duodenal  
26 ulcer, cirrhosis or other liver disease, urinary incontinence, kidney problems, chronic back or neck  
27 disorder, rheumatoid arthritis, arthrosis, osteoporosis, cancer, severe headache as migraine or  
28 chronic anxiety). Based on this information, the variable "ever being diagnosed with a chronic  
29 disease or condition" was generated with four categories: 0, 1, 2 and  $\geq 3$  chronic disease or  
30 condition. Multimorbidity was defined as having two or more chronic diseases or conditions  
31 diagnosed by a medical doctor.  
32  
33

### 34 35 36 37 *Explanatory variables*

38  
39 Sociodemographic characteristics included age, sex and immigration status. As Portuguese are the  
40 largest immigrant community in Luxembourg, immigration status was categorized in non-  
41 immigrant, immigrant born in Portugal and immigrant born in other countries. Socioeconomic  
42 status included education (primary, secondary and tertiary education completed) and job status  
43 (unemployed; managers/professionals; technical/clerical/service occupation; skilled/unskilled  
44 workers).  
45  
46

47  
48 Lifestyles included smoking (never; current; ex-smokers), alcohol consumption (never; ex-drinkers;  
49 drinkers), physical activity (never;  $\leq 3$ hrs/week of sports, fitness, and/or recreational activities  
50 which lasted at least 10 consecutive minutes;  $>3$ hrs/week of sports, fitness, and/or recreational  
51 activities which lasted at least 10 consecutive minutes), and vegetable and fruit consumption ( $< 1$   
52 portion/ day, 1-4 portions/day,  $\geq 5$  portions/day). Weight and height were measured by trained  
53  
54  
55  
56  
57  
58

nurses and used to calculate body mass index (BMI; kg/m<sup>2</sup>). BMI was categorized as normal body weight (<25 kg/m<sup>2</sup>), overweight (25-29.99 kg/m<sup>2</sup>) and obesity (≥30kg/m<sup>2</sup>).

### *Statistical data analysis*

Means and frequencies were used for descriptive purposes. We calculated the prevalence of sleep disorders, short and long sleep duration, chronic conditions/diseases and multimorbidity.

Percentages did not include missing values. A chi-square test ( $\chi^2$ ) or Student t-test were used to analyze associations between the prevalence of sleep duration and covariates and the prevalence of multimorbidity and covariates. The association between sleep duration and chronic conditions/diseases was assessed using multinomial logistic regression models (reference for sleep duration when having to work the next day was 6-7h per night and reference for sleep duration when not having to work the next day was 7-8h) adjusted for sociodemographic characteristics, socioeconomic status and physical activity. We considered a  $P < 0.05$  statistically significant. To be representative of the population and avoid biased estimates, the observations were weighted.

Participants with missing values on sleep habits and or multimorbidity were not included in the present analysis. Analyses were performed using STATA 14.0 and SAS version 9.4 (SAS Institute Inc., Cary, NC, USA).

## **Results**

**Table 1** shows the prevalence of chronic conditions/diseases, multimorbidity, sleep duration and sleep disorders. Nearly half of participants reported being diagnosed with two or more chronic conditions/ diseases, and nearly a third of participants reported being diagnosed with three or more chronic conditions/diseases. More than 8% of participants were diagnosed with a sleep disorder and a third reported having difficulties in sleeping through the night. Participants reported sleeping 7.86hrs/night when they did not have to work the next day, nearly one hour more than when they had to work the next day (6.95hrs/night).

Participant characteristics by chronic conditions/diseases are shown in **Table 2**. More men than women presented three or more chronic diseases. Higher number of chronic diseases/conditions increased with age: those aged 55 to 64 presented more chronic conditions compared to those aged 25-34. Immigrants born in Portugal presented more chronic conditions than non-immigrants and other immigrants. Participants being less educated and unemployed presented more chronic conditions compared to those employed and highly educated. Participants being less physically active and with obesity presented more chronic conditions/diseases than those being more physically active and with a lower BMI.

Participant characteristics by sleep duration are shown in **Table 3**. When participants had to work the following day, more men than women reported a medium sleep duration. Short sleep duration was more likely among immigrants born in Portugal, participants with lower education and skilled/unskilled workers. Short sleep duration was less common among those being physically active and with a BMI less than 25 Kg/m<sup>2</sup>. When participants did not have to work the next day, short sleep duration was more common among older individuals, immigrants born in Portugal, unemployed people, and those being less physically active. Long sleep duration was observed among participants with lower education. No differences in sleep duration were observed between men and women.

**Table 4** shows results from multinomial logistic regression analyses examining the association between sleep duration and chronic conditions/diseases, and adjusted by sociodemographic characteristics, socioeconomic position and physical activity. Among participants who reported sleep hours when they did not have to work the next day, those sleeping less hours (<7h) were 2.35 and 2.85 times as likely to report having 2 and 3 or more chronic conditions after adjusting for covariates. In models adjusted for different indicators of socioeconomic status, sociodemographic and physical activity, the strength of associations between sleep duration and multimorbidity remained statistically significant. The same association (although more accentuated) was observed in those participant with a job at the moment of the survey who reported the number of sleep hours when they had to work the next day: those sleeping less hours (<6h) were 3.07 and 3.70 times as likely to report having 2 and 3 or more chronic conditions after adjusting for covariates.

Estimates of sleep problems and chronic conditions are presented in **Table S1**. The prevalence of sleep problems was high, with 1 out of 3 participants having difficulties in sleeping the night through, nearly 8% of participants diagnosed with a sleep disorder and 4.26% taking sleeping medication. In all cases, the percentage of participants with sleep problems increased with the number of chronic diseases.

## Discussion

Sleep problems are highly prevalent in Luxembourg, where nearly 34% of the resident population aged 25-64 reported having difficulties sleeping through the night, 8.21% having been diagnosed a sleep disorder, and 4.26% taking sleep medication. Moreover, 6.08% and 28.82% of the Luxembourg population reported sleeping respectively less than 6 hours and less than 7 hours per night during working days. The latter decreased to 13.52% when participants did not have to work on the following day. Luxembourg residents sleep on average 6.95hrs/night when they have to work the following day, nearly one hour less than when they do not have to work the next day. Results

1  
2  
3 are similar to those observed in other countries (27, 28), although in countries such as Brazil the  
4 prevalence of short sleep duration was of nearly 22% (29), and in the United States values reached  
5 up to 34.8% in 2014 (30). However, in the present study the age range from 25 to 64 years must be  
6 taken into account since it does not include adults over 65 years old who usually sleep less hours.  
7 This means that the prevalence of the Luxembourg population sleeping less than the recommended  
8 hours is likely to be higher.  
9

10  
11  
12 Multimorbidity was also highly prevalent in Luxembourg, especially when taking into account the  
13 fact that the study population was up to 65 years, which represents a relatively young population  
14 since multimorbidity prevalence naturally increases with age (22). Nearly half of participants had  
15 two or more chronic diseases and 31% had three or more chronic diseases/conditions. The most  
16 prevalent diseases were chronic low back disorder or other chronic back defect followed by  
17 hypercholesterolemia, arthrosis and hypertension.  
18

19  
20 Short sleep duration was also more common among immigrants. The relationship between  
21 immigration status and sleep patterns remains unclear, with some studies showing a protective  
22 effect and others observing an opposite effect, possibly related to the stress linked to the migratory  
23 processes, cultural adaptation, or working conditions in the host country (31, 32). In our study,  
24 Portuguese immigrants were more likely to sleep less than 6h per night during work days.  
25 Portuguese are the most important immigrant community in Luxembourg, accounting for 16% of  
26 the 46% immigrant population living in Luxembourg. Compared to Luxembourgish natives,  
27 Portuguese immigrants have a lower socioeconomic status (33) (including income, education and  
28 employment) which could partly explain why the Portuguese have a greater likelihood of being  
29 short sleepers. Job status seems to play an important role, since the effect is not significant when  
30 compared to short sleep duration when not having to work the next day.  
31

32  
33 In our study, long sleep duration was more common in women. This was in line with other studies  
34 which showed that men usually sleep less hours, though women reported having more sleep  
35 problems (34). However, this relationship is complex and could depend on family composition (e.g.  
36 single parents have shorter sleep duration, particularly women) (35).  
37

38  
39 Physical activity was associated with sleep duration but only during days when not having to work  
40 the next day. Physical activity would reduce the likelihood of short and/or long sleep duration and  
41 maintain an optimal duration. Studies have observed an association between physical activity and  
42 sleep, improving quality of sleep, sleep efficiency, and total sleep time (12, 36).  
43

44  
45 In our study we observed that short sleep duration was significantly linearly associated with the  
46 number of chronic conditions independently of socioeconomic and behavioral characteristics, an  
47  
48  
49  
50  
51  
52  
53  
54  
55  
56  
57  
58  
59  
60

1  
2  
3 effect accentuated during working days, when sleep hours are reduced. Our results are in line with  
4 those from other studies that have observed an association between sleep and number of chronic  
5 diseases, although previous studies have been usually performed in populations of older adults (e.g.  
6 over 50 years old) (19, 37). As observed by Koyanagi et al., sleep problems increase with the  
7 number of diseases in both low and high income countries independent of their economic  
8 development (19). These associations could explain the observed relationship of sleep duration  
9 (below the recommended 7 hours) and poor sleep quality with mortality, even among adults  
10 younger than 65 years old (18). It is not clear if sleep problems are a consequence of chronic  
11 diseases (e.g. pathologies themselves affect sleep) or part of the cause (sleep predispose the  
12 individual to more diseases or exacerbates the symptoms), although it is plausible that sleep  
13 problems and chronic diseases are linked by a bidirectional association (38).

14  
15 Although both sleep problems and the number of chronic diseases increase with age, and are more  
16 prevalent in older adults, our study shows that the prevalence is also high in adults under 65 and the  
17 association begins much earlier. It is therefore necessary to detect these problems earlier in order to  
18 improve individual health and general wellbeing and reduce mortality, particularly in the context of  
19 ageing populations burdened by the accumulation of multiple chronic conditions over time.

20  
21 In terms of potential mechanisms to corroborate the biological plausibility of the link between sleep  
22 problems and multimorbidity, sleep deprivation has been associated with a number of chronic  
23 conditions, including cardio-metabolic and neurodegenerative disease, cancer, musculoskeletal  
24 disorders, and mental problems (15, 16). In addition, sleep problems often cluster with major  
25 behavioral risk factors such as cigarette smoking, heavy drinking, and physical inactivity, which  
26 may in turn increase the risk of chronic disease. Furthermore, there is experimental evidence  
27 corroborating the plausibility of deleterious effects of lack of sleep on endocrine, immune,  
28 neurovegetative and inflammatory pathways (1-3).

29  
30 Limitations of the present study include the subjective measure of sleep duration (self-reported  
31 number of hours of sleep) instead of an objective measure (e.g. actigraphy, polysomnography).  
32 However, in the absence of an objective measure, there is a moderate correlation between both  
33 objective and subjective measurements, a correlation that is high during weekdays possibly due to  
34 routines (39), but may be attenuate based on certain individual characteristics (e.g. presence of  
35 pathologies such as depression, sociodemographic characteristics) (40). Other limitations include  
36 the fact that we did not include other sleep problems such as insomnia or sleep apnea nor  
37 environmental factors such as noise, traffic or commuting, all of which could affect sleep duration.  
38 In addition, multimorbidity was also self-reported and due to a limited predetermined list of  
39  
40  
41  
42  
43  
44  
45  
46  
47  
48  
49  
50  
51  
52  
53  
54  
55  
56  
57  
58  
59  
60

1  
2  
3 diseases in the questionnaire, participants may have not reported some conditions they may have  
4 had and underestimate the prevalence of multimorbidity. Information on non- responders was not  
5 available and despite being a representative sample of the Luxembourg population (in terms of age,  
6 sex and district) we could not determine the possibility of a non-response bias. Finally, it should be  
7 noted that the design of the study (cross-sectional) does not allow to ascertain a causal link between  
8 sleep and multimorbidity; in addition, the low participation rate may affect the generalizability of  
9 our results.  
10  
11  
12  
13

14 This is the first study in Luxembourg on the prevalence of sleep patterns, with a focus on short and  
15 long sleep duration, and their relationship with multimorbidity. Short sleep duration, having  
16 difficulties in sleeping the night through, sleep disorders and sleeping medication are a public health  
17 problem, especially when associated with a number of chronic conditions and diseases, thus  
18 producing a negative impact on the wellbeing and general health status of the population. As both  
19 sleep problems and multimorbidity are highly prevalent in Luxembourg, health promotion programs  
20 should be addressed to improve and promote healthy sleeping habits among the general population,  
21 which in turn may be beneficial on a number of chronic disease outcomes.  
22  
23  
24  
25  
26  
27

## 28 **Acknowledgements**

29 We are grateful to the population of Luxembourg and to all the EHES-LUX team who have  
30 contributed to this study. We would like to thank Kuemmerle A, Barre J, Dincau M, Delagardelle  
31 C, Michel G, Schlessler M, Mormont D, Chioti A, Gantenbein M, Lieunard C, Columeau A, Kiemen  
32 M, Weis J, Ambrozet G, Billy A, Larcelet M, Marcic D, Gauthier C, and Viau-Courville M for their  
33 valuable contributions.  
34  
35  
36  
37  
38  
39  
40  
41  
42  
43  
44  
45  
46  
47  
48  
49  
50  
51  
52  
53  
54  
55  
56  
57  
58  
59  
60

## References

1. Ferrie JE, Kivimäki M, Akbaraly TN, Singh-Manoux A, Miller MA, Gimeno D, et al. Associations between change in sleep duration and inflammation: findings on C-reactive protein and interleukin 6 in the Whitehall II Study. *American journal of epidemiology*. 2013;178(6):956-61.
2. Ferrie JE, Shipley MJ, Akbaraly TN, Marmot MG, Kivimäki M, Singh-Manoux A. Change in sleep duration and cognitive function: findings from the Whitehall II Study. *Sleep*. 2011;34(5):565-73.
3. St-Onge M-P. The role of sleep duration in the regulation of energy balance: effects on energy intakes and expenditure. *Journal of clinical sleep medicine: JCSM: official publication of the American Academy of Sleep Medicine*. 2013;9(1):73.
4. Watson NF, Badr MS, Belenky G, Bliwise DL, Buxton OM, Buysse D, et al. Recommended Amount of Sleep for a Healthy Adult: A Joint Consensus Statement of the American Academy of Sleep Medicine and Sleep Research Society. *Sleep*. 2015;38(6):843-4.
5. Centers for Disease Control and Prevention CDC 24/7: Saving lives, Protecting People 1600 Clifton Road Atlanta, GA 30329-4027 USA [updated June 5, 2017. National Center for Chronic Disease Prevention and Health Promotion, Division of Population Health  
Available from: [https://www.cdc.gov/sleep/about\\_us.html](https://www.cdc.gov/sleep/about_us.html).
6. Buysse DJ. Sleep health: can we define it? Does it matter? *Sleep*. 2014;37(1):9-17.
7. Ford ES, Cunningham TJ, Croft JB. Trends in self-reported sleep duration among US adults from 1985 to 2012. *Sleep*. 2015;38(5):829-32.
8. Stranges S, Dorn JM, Shipley MJ, Kandala N-B, Trevisan M, Miller MA, et al. Correlates of short and long sleep duration: a cross-cultural comparison between the United Kingdom and the United States: the Whitehall II Study and the Western New York Health Study. *American journal of epidemiology*. 2008;168(12):1353-64.
9. Grandner MA, Williams NJ, Knutson KL, Roberts D, Jean-Louis G. Sleep disparity, race/ethnicity, and socioeconomic position. *Sleep medicine*. 2016;18:7-18.
10. Yoon H-S, Yang JJ, Song M, Lee H-W, Han S, Lee S-A, et al. Correlates of self-reported sleep duration in middle-aged and elderly Koreans: from the health examinees study. *PloS one*. 2015;10(5):e0123510.

11. Stringhini S, Haba-Rubio J, Marques-Vidal P, Waeber G, Preisig M, Guessous I, et al. Association of socioeconomic status with sleep disturbances in the Swiss population-based CoLaus study. *Sleep medicine*. 2015;16(4):469-76.
12. Gubelmann C, Heinzer R, Haba-Rubio J, Vollenweider P, Marques-Vidal P. Physical Activity is Associated with Higher Sleep Efficiency in the General Population: The CoLaus Study. *Sleep*. 2018.
13. Campanini MZ, Guallar-Castillon P, Rodriguez-Artalejo F, Lopez-Garcia E. Mediterranean Diet and Changes in Sleep Duration and Indicators of Sleep Quality in Older Adults. *Sleep*. 2017;40(3).
14. Dashti HS, Scheer FA, Jacques PF, Lamon-Fava S, Ordovás JM. Short sleep duration and dietary intake: epidemiologic evidence, mechanisms, and health implications. *Advances in nutrition*. 2015;6(6):648-59.
15. Alcantara C, Biggs ML, Davidson KW, Delaney JA, Jackson CL, Zee PC, et al. Sleep Disturbances and Depression in the Multi-Ethnic Study of Atherosclerosis. *Sleep*. 2016;39(4):915-25.
16. Rangaraj VR, Knutson KL. Association between sleep deficiency and cardiometabolic disease: implications for health disparities. *Sleep medicine*. 2016;18:19-35.
17. St-Onge MP, Grandner MA, Brown D, Conroy MB, Jean-Louis G, Coons M, et al. Sleep Duration and Quality: Impact on Lifestyle Behaviors and Cardiometabolic Health: A Scientific Statement From the American Heart Association. *Circulation*. 2016;134(18):e367-e86.
18. Akerstedt T, Ghilotti F, Grotta A, Bellavia A, Lagerros YT, Bellocco R. Sleep duration, mortality and the influence of age. *European journal of epidemiology*. 2017;32(10):881-91.
19. Koyanagi A, Garin N, Olaya B, Ayuso-Mateos JL, Chatterji S, Leonardi M, et al. Chronic conditions and sleep problems among adults aged 50 years or over in nine countries: a multi-country study. *PloS one*. 2014;9(12):e114742.
20. Wang S, Li B, Wu Y, Ungvari GS, Ng CH, Fu Y, et al. Relationship of Sleep Duration with Sociodemographic Characteristics, Lifestyle, Mental Health, and Chronic Diseases in a Large Chinese Adult Population. *Journal of clinical sleep medicine: JCSM: official publication of the American Academy of Sleep Medicine*. 2017;13(3):377-84.
21. van den Akker M, Buntinx F, Knottnerus JA. Comorbidity or multimorbidity: what's in a name? A review of literature. *The European Journal of General Practice*. 1996;2(2):65-70.



- 1
- 2
- 3 22. Xu X, Mishra GD, Jones M. Evidence on multimorbidity from definition to intervention: An
- 4 overview of systematic reviews. *Ageing research reviews*. 2017;37:53-68.
- 5
- 6 23. Afshar S, Roderick PJ, Kowal P, Dimitrov BD, Hill AG. Multimorbidity and the inequalities
- 7 of global ageing: a cross-sectional study of 28 countries using the World Health Surveys. *BMC*
- 8 *public health*. 2015;15(1):776.
- 9
- 10 24. Barnett K, Mercer SW, Norbury M, Watt G, Wyke S, Guthrie B. Epidemiology of
- 11 multimorbidity and implications for health care, research, and medical education: a cross-sectional
- 12 study. *The Lancet*. 2012;380(9836):37-43.
- 13
- 14 25. Ruiz-Castell M, Kandala NB, Kuemmerle A, Schritz A, Barre J, Delagardelle C, et al.
- 15 Hypertension burden in Luxembourg: Individual risk factors and geographic variations, 2013 to
- 16 2015 European Health Examination Survey. *Medicine*. 2016;95(36):e4758.
- 17
- 18 26. Johns MW. A new method for measuring daytime sleepiness: the Epworth sleepiness scale.
- 19 *Sleep*. 1991;14(6):540-5.
- 20
- 21 27. Kleiser C, Wawro N, Stelmach-Mardas M, Boeing H, Gedrich K, Himmerich H, et al. Are
- 22 sleep duration, midpoint of sleep and sleep quality associated with dietary intake among Bavarian
- 23 adults? *European journal of clinical nutrition*. 2017;71(5):631-7.
- 24
- 25 28. Lakerveld J, Mackenbach JD, Horvath E, Rutters F, Compernelle S, Bardos H, et al. The
- 26 relation between sleep duration and sedentary behaviours in European adults. *Obesity reviews* : an
- 27 official journal of the International Association for the Study of Obesity. 2016;17 Suppl 1:62-7.
- 28
- 29 29. Lima MG, Francisco PMSB, de Azevedo Barros MB. Sleep duration pattern and chronic
- 30 diseases in Brazilian adults (ISACAMP, 2008/09). *Sleep medicine*. 2012;13(2):139-44.
- 31
- 32 30. Liu Y. Prevalence of healthy sleep duration among adults—United States, 2014. *MMWR*
- 33 *Morbidity and mortality weekly report*. 2016;65.
- 34
- 35 31. Grandner MA, Petrov ME, Rattanaumpawan P, Jackson N, Platt A, Patel NP. Sleep
- 36 symptoms, race/ethnicity, and socioeconomic position. *Journal of clinical sleep medicine* : JCSM :
- 37 official publication of the American Academy of Sleep Medicine. 2013;9(9):897-905; a-d.
- 38
- 39 32. Jackson CL, Hu FB, Redline S, Williams DR, Mattei J, Kawachi I. Racial/ethnic disparities
- 40 in short sleep duration by occupation: the contribution of immigrant status. *Social science &*
- 41 *medicine* (1982). 2014;118:71-9.
- 42
- 43
- 44
- 45
- 46
- 47
- 48
- 49
- 50
- 51
- 52
- 53
- 54
- 55
- 56
- 57
- 58
- 59
- 60

- 1  
2  
3 33. Vincent H, Noel PAM, Philippe VK. Measuring and accounting for the deprivation gap of  
4 Portuguese immigrants in Luxembourg. LISER; 2012.
- 5  
6  
7 34. Polo-Kantola P, Laine A, Kronholm E, Saarinen MM, Rautava P, Aromaa M, et al. Gender  
8 differences in actual and preferred nocturnal sleep duration among Finnish employed population.  
9 *Maturitas*. 2016;94:77-83.
- 10  
11  
12 35. Nugent CN, Black LI. Sleep Duration, Quality of Sleep, and Use of Sleep Medication, by  
13 Sex and Family Type, 2013-2014. NCHS data brief. 2016(230):1-8.
- 14  
15  
16 36. Kredlow MA, Capozzoli MC, Hearon BA, Calkins AW, Otto MW. The effects of physical  
17 activity on sleep: a meta-analytic review. *Journal of behavioral medicine*. 2015;38(3):427-49.
- 18  
19  
20 37. Wang Y-M, Song M, Wang R, Shi L, He J, Fan T-T, et al. Insomnia and multimorbidity in  
21 the community elderly in China. *Journal of clinical sleep medicine: JCSM: official publication of*  
22 *the American Academy of Sleep Medicine*. 2017;13(4):591.
- 23  
24  
25 38. Marshall NS, Stranges S. Are sleep difficulties the “canary in the coalmine” for aortic  
26 calcification in women? *Sleep medicine*. 2013;14(5):389-90.
- 27  
28  
29 39. Cespedes EM, Hu FB, Redline S, Rosner B, Alcantara C, Cai J, et al. Comparison of Self-  
30 Reported Sleep Duration With Actigraphy: Results From the Hispanic Community Health  
31 Study/Study of Latinos Sueno Ancillary Study. *American journal of epidemiology*.  
32 2016;183(6):561-73.
- 33  
34  
35 40. Matthews KA, Patel SR, Pantesco EJ, Buysse DJ, Kamarck TW, Lee L, et al. Similarities  
36 and differences in estimates of sleep duration by polysomnography, actigraphy, diary, and self-  
37 reported habitual sleep in a community sample. *Sleep health*. 2018;4(1):96-103.
- 38  
39  
40  
41  
42  
43  
44  
45  
46  
47  
48  
49  
50  
51  
52  
53  
54  
55  
56  
57  
58  
59  
60

**Table 1.** Chronic diseases/conditions, multimorbidity and sleep: European Health Examination Survey in Luxembourg (N =1508).

|                                                                        | N (%) / Mean $\pm$ SD |
|------------------------------------------------------------------------|-----------------------|
| Hypertension                                                           | 250 (16.59)           |
| High cholesterol                                                       | 458 (30.39)           |
| Diabetes                                                               | 69 (4.58)             |
| Coronary heart disease or angina pectoris                              | 26 (1.73)             |
| Myocardial infarction or chronic consequences of myocardial infarction | 14 (0.93)             |
| Stroke or chronic consequences of stroke                               | 11 (0.73)             |
| Stomach or duodenal ulcer                                              | 81 (5.37)             |
| Cirrhosis of the liver or other liver disease                          | 46 (3.05)             |
| Urinary incontinence, problems in controlling the bladder              | 74 (4.91)             |
| Kidney problems                                                        | 108 (7.17)            |
| Chronic low back disorder or other chronic back defect                 | 489 (32.47)           |
| Chronic neck disorder or other chronic neck defect                     | 246 (16.32)           |
| Rheumatoid arthritis                                                   | 88 (5.85)             |
| Arthrosis                                                              | 292 (19.38)           |
| Osteoporosis                                                           | 44 (2.92)             |
| Cancer                                                                 | 54 (3.59)             |
| Severe headache such as migraine                                       | 271 (17.98)           |
| Chronic anxiety                                                        | 98 (6.50)             |
| Depression                                                             | 204 (13.54)           |
| Number of chronic diseases                                             |                       |
| 0                                                                      | 405 (27.00)           |
| 1                                                                      | 362 (24.13)           |
| $\geq 2$ (multimorbidity)                                              | 733 (49.00)           |
| $\geq 3$                                                               | 465 (31.00)           |
| Sleep                                                                  |                       |
| Diagnosis of sleep disorder                                            | 122 (8.21)            |
| Sleepiness <sup>a</sup>                                                | 118 (7.89)            |
| Have difficulties in sleeping the night through                        | 510 (33.89)           |
| Sleeping medication                                                    | 64 (4.26)             |
| Sleep duration                                                         |                       |

|                                                            |             |
|------------------------------------------------------------|-------------|
| Hours when you have to work the next day (N=1,152-working) | 6.95±0.97   |
| <6hrs/night                                                | 70 (6.08)   |
| 6-7hrs/night                                               | 761 (66.06) |
| >7hrs/night                                                | 321 (27.86) |
| Hours when you don't work the next day (N=1,501)           | 7.86±1.30   |
| <7hrs/night                                                | 203 (13.52) |
| 7-8hrs/night                                               | 878 (58.49) |
| >8hrs/night                                                | 420 (27.98) |

---

N=number, SD=standard deviation

<sup>a</sup> Measured with Epworth Sleepiness Scale

**Table 2.** Participant characteristics by chronic conditions/diseases: European Health Examination Survey in Luxembourg (N =1508).

|                                         | Chronic conditions/diseases |             |             |             | P <sup>a</sup> |
|-----------------------------------------|-----------------------------|-------------|-------------|-------------|----------------|
|                                         | 0                           | 1           | 2           | ≥3          |                |
| <b>Sex</b>                              |                             |             |             |             |                |
| Men                                     | 199 (27.72)                 | 199 (27.72) | 143 (19.92) | 177 (24.65) | <0.001         |
| Women                                   | 206 (26.34)                 | 163 (20.84) | 125 (15.98) | 288 (36.83) |                |
| <b>Age</b>                              |                             |             |             |             |                |
| 25-34                                   | 130 (43.62)                 | 86 (28.86)  | 48 (16.11)  | 34 (11.41)  | <0.001         |
| 35-44                                   | 156 (34.29)                 | 119 (26.15) | 69 (15.16)  | 111 (24.40) |                |
| 45-54                                   | 83 (18.16)                  | 111 (24.29) | 98 (21.44)  | 165 (36.11) |                |
| 55-64                                   | 36 (12.41)                  | 46 (15.86)  | 53 (18.28)  | 155 (53.45) |                |
| <b>Immigration</b>                      |                             |             |             |             |                |
| Luxembourg                              | 184 (23.44)                 | 197 (25.10) | 144 (18.34) | 260 (33.12) | <0.001         |
| Portugal                                | 52 (23.85)                  | 42 (19.27)  | 45 (20.64)  | 79 (36.24)  |                |
| Other                                   | 169 (34.00)                 | 123 (24.75) | 79 (15.90)  | 126 (25.35) |                |
| <b>Education</b>                        |                             |             |             |             |                |
| Primary                                 | 68 (18.38)                  | 75 (20.27)  | 64 (17.30)  | 163 (44.05) | <0.001         |
| Secondary                               | 133 (23.05)                 | 142 (24.61) | 106 (18.37) | 196 (33.97) |                |
| Tertiary                                | 203 (37.04)                 | 145 (26.46) | 97 (17.70)  | 103 (18.80) |                |
| <b>Job</b>                              |                             |             |             |             |                |
| Not working                             | 58 (16.67)                  | 56 (16.09)  | 58 (16.67)  | 176 (50.57) | <0.001         |
| managers/professionals                  | 168 (35.59)                 | 138 (29.24) | 73 (15.47)  | 93 (19.70)  |                |
| technicians/clerical/service occupation | 119 (29.38)                 | 89 (21.98)  | 76 (18.77)  | 121 (29.88) |                |

|    |                                   |              |              |              |              |        |
|----|-----------------------------------|--------------|--------------|--------------|--------------|--------|
| 1  |                                   |              |              |              |              |        |
| 2  |                                   |              |              |              |              |        |
| 3  |                                   |              |              |              |              |        |
| 4  | skilled/unskilled workers         | 60 (21.90)   | 79 (28.83)   | 61 (22.26)   | 74 (27.01)   |        |
| 5  |                                   |              |              |              |              |        |
| 6  | Smoking                           |              |              |              |              |        |
| 7  | Never                             | 239 (29.25)  | 209 (25.58)  | 145 (17.75)  | 224 (27.42)  | 0.026  |
| 8  |                                   |              |              |              |              |        |
| 9  | Current                           | 90 (26.01)   | 75 (21.68)   | 63 (18.21)   | 118 (34.10)  |        |
| 10 |                                   |              |              |              |              |        |
| 11 | Ex-smoker                         | 74 (22.09)   | 78 (23.28)   | 60 (17.91)   | 123 (36.72)  |        |
| 12 |                                   |              |              |              |              |        |
| 13 | Alcohol                           |              |              |              |              |        |
| 14 | Never                             | 30 (27.78)   | 21 (19.44)   | 20 (18.52)   | 37 (34.26)   | 0.055  |
| 15 |                                   |              |              |              |              |        |
| 16 | Drinkers                          | 365 (27.53)  | 328 (24.74)  | 234 (17.65)  | 399 (30.09)  |        |
| 17 |                                   |              |              |              |              |        |
| 18 | Ex-drinkers                       | 8 (12.50)    | 13 (20.31)   | 14 (21.88)   | 29 (45.31)   |        |
| 19 |                                   |              |              |              |              |        |
| 20 | Fruits and vegetables consumption |              |              |              |              |        |
| 21 | <1 portion/day                    | 126 (27.39)  | 112 (24.35)  | 87 (18.91)   | 135 (29.35)  | 0.597  |
| 22 |                                   |              |              |              |              |        |
| 23 | 1-4 portions/day                  | 223 (27.81)  | 183 (22.82)  | 142 (17.71)  | 254 (31.67)  |        |
| 24 |                                   |              |              |              |              |        |
| 25 | ≥5 portions/day                   | 55 (23.31)   | 66 (27.97)   | 39 (16.53)   | 76 (32.20)   |        |
| 26 |                                   |              |              |              |              |        |
| 27 | Physical Activity                 |              |              |              |              |        |
| 28 | Never                             | 130 (21.35)  | 133 (21.84)  | 125 (20.53)  | 221 (36.29)  | <0.001 |
| 29 |                                   |              |              |              |              |        |
| 30 | ≤3h/week                          | 151 (29.84)  | 130 (25.69)  | 77 (15.22)   | 148 (29.25)  |        |
| 31 |                                   |              |              |              |              |        |
| 32 | >3h/week                          | 121 (31.84)  | 98 (25.79)   | 65 (17.11)   | 96 (25.26)   |        |
| 33 |                                   |              |              |              |              |        |
| 34 | BMI                               | 25.27 ± 4.06 | 26.04 ± 4.89 | 26.66 ± 4.96 | 28.07 ± 5.56 | <0.001 |
| 35 |                                   |              |              |              |              |        |
| 36 | <25                               | 212 (33.02)  | 169 (26.32)  | 112 (17.45)  | 149 (23.21)  | <0.001 |
| 37 |                                   |              |              |              |              |        |
| 38 | 25-30                             | 152 (27.39)  | 131 (23.60)  | 100 (18.02)  | 172 (30.99)  |        |
| 39 |                                   |              |              |              |              |        |
| 40 | ≥30                               | 41 (13.62)   | 61 (20.27)   | 55 (18.27)   | 144 (47.84)  |        |

Values are: numbers (%) for categorical variables and means±standard deviation for continuous variables. BMI: Body Mass Index.<sup>a</sup>  $\chi^2$  test for categorical variables, t-test for continuous variables.

**Table 3.** Participant's characteristics by Sleep duration: European Health Examination Survey in Luxembourg (N =1508).

|                    | Sleep hours when you have to work the next day<br>(N=1,152-working) |              |             |                | Sleep hours when you do NOT work the next day<br>(N=1,501) |              |             |                |
|--------------------|---------------------------------------------------------------------|--------------|-------------|----------------|------------------------------------------------------------|--------------|-------------|----------------|
|                    | 6-7hrs/night                                                        | <6hrs/night  | >7hrs/night | P <sup>a</sup> | 7-8hrs/night                                               | <7hrs/night  | >8hrs/night | P <sup>a</sup> |
| <b>Sex</b>         |                                                                     |              |             |                |                                                            |              |             |                |
| Men                | 419 (70.78)                                                         | 41 (6.93)    | 132 (22.30) | <0.001         | 442 (56.52)                                                | 106 (13.55)  | 234 (29.92) | 0.193          |
| Women              | 342 (61.07)                                                         | 29 (5.18)    | 189 (33.75) |                | 436 (60.64)                                                | 97 (13.49)   | 186 (25.87) |                |
| <b>Age</b>         |                                                                     |              |             |                |                                                            |              |             |                |
| 43.08 ± 9.04       | 45.18 ± 8.90                                                        | 42.66 ± 9.01 | 0.107       | 45.47 ± 10.01  | 48.44 ± 9.62                                               | 42.38 ± 9.74 | <0.001      |                |
| 25-34              | 168 (64.62)                                                         | 10 (3.85)    | 82 (31.54)  | 0.452          | 157 (52.86)                                                | 22 (7.41)    | 118 (39.73) | <0.001         |
| 35-44              | 264 (67.52)                                                         | 23 (5.88)    | 104 (26.60) |                | 272 (59.78)                                                | 51 (11.21)   | 132 (29.01) |                |
| 45-54              | 252 (65.80)                                                         | 27 (7.05)    | 104 (27.15) |                | 270 (58.82)                                                | 70 (15.25)   | 119 (25.93) |                |
| 55-64              | 77 (65.25)                                                          | 10 (8.47)    | 31 (26.27)  |                | 179 (61.72)                                                | 60 (20.69)   | 51 (17.59)  |                |
| <b>Immigration</b> |                                                                     |              |             |                |                                                            |              |             |                |
| Luxembourg         | 406 (66.56)                                                         | 28 (4.59)    | 176 (28.85) | 0.011          | 500 (63.61)                                                | 77 (9.80)    | 209 (26.59) | <0.001         |
| Portugal           | 104 (62.65)                                                         | 20 (12.05)   | 42 (25.30)  |                | 105 (48.17)                                                | 48 (22.02)   | 65 (29.82)  |                |
| Other              | 251 (66.76)                                                         | 22 (5.85)    | 103 (27.39) |                | 273 (54.93)                                                | 78 (15.69)   | 146 (29.38) |                |
| <b>Education</b>   |                                                                     |              |             |                |                                                            |              |             |                |
| Primary            | 147 (63.36)                                                         | 25 (10.78)   | 60 (25.86)  | 0.004          | 186 (50.27)                                                | 89 (24.05)   | 346 (62.91) | <0.001         |
| Secondary          | 278 (65.11)                                                         | 28 (6.56)    | 121 (28.34) |                | 343 (59.55)                                                | 76 (13.19)   | 37 (6.73)   |                |
| Tertiary           | 335 (68.37)                                                         | 17 (3.47)    | 128 (28.16) |                | 346 (62.91)                                                | 157 (27.26)  | 167 (30.36) |                |
| <b>Job</b>         |                                                                     |              |             |                |                                                            |              |             |                |
| Not working        | NA                                                                  | NA           | NA          |                | 204 (58.62)                                                | 92 (26.44)   | 52 (14.94)  | <0.001         |

|    |                                   |              |              |              |        |              |              |              |        |
|----|-----------------------------------|--------------|--------------|--------------|--------|--------------|--------------|--------------|--------|
| 1  |                                   |              |              |              |        |              |              |              |        |
| 2  |                                   |              |              |              |        |              |              |              |        |
| 3  |                                   |              |              |              |        |              |              |              |        |
| 4  | managers/professionals            | 319 (67.58)  | 16 (3.39)    | 137 (29.03)  | 0.023  | 292 (61.73)  | 31 (6.55)    | 150 (31.71)  |        |
| 5  | technicians/clerical/serv         |              |              |              |        |              |              |              |        |
| 6  | ice occupation                    | 267 (65.60)  | 29 (7.13)    | 111 (27.27)  |        | 239 (58.44)  | 43 (10.51)   | 127 (31.05)  |        |
| 7  | skilled/unskilled                 |              |              |              |        |              |              |              |        |
| 8  | workers                           | 175 (64.10)  | 25 (9.16)    | 73 (26.74)   |        | 143 (52.77)  | 37 (13.65)   | 91 (33.58)   |        |
| 9  |                                   |              |              |              |        |              |              |              |        |
| 10 | Smoking                           |              |              |              |        |              |              |              |        |
| 11 |                                   |              |              |              |        |              |              |              |        |
| 12 | Never                             | 431 (65.11)  | 38 (5.74)    | 193 (29.15)  | 0.736  | 477 (58.46)  | 92 (11.27)   | 247 (30.27)  | 0.013  |
| 13 | Current                           | 179 (68.32)  | 18 (6.87)    | 65 (24.81)   |        | 193 (55.46)  | 59 (16.95)   | 96 (27.59)   |        |
| 14 | Ex-smoker                         | 151 (66.52)  | 14 (6.17)    | 62 (27.31)   |        | 207 (61.61)  | 52 (15.48)   | 77 (22.92)   |        |
| 15 |                                   |              |              |              |        |              |              |              |        |
| 16 | Alcohol                           |              |              |              |        |              |              |              |        |
| 17 |                                   |              |              |              |        |              |              |              |        |
| 18 | Never                             | 41 (60.29)   | 4 (5.88)     | 23 (33.82)   | 0.037  | 59 (54.13)   | 17 (15.60)   | 33 (30.28)   | 0.005  |
| 19 | Drinkers                          | 702 (66.79)  | 60 (5.71)    | 289 (27.50)  |        | 790 (59.44)  | 168 (12.64)  | 371 (27.92)  |        |
| 20 | Ex-drinkers                       | 18 (54.55)   | 6 (18.18)    | 9 (27.27)    |        | 29 (46.77)   | 18 (29.03)   | 15 (24.19)   |        |
| 21 |                                   |              |              |              |        |              |              |              |        |
| 22 | Fruits and vegetables consumption |              |              |              |        |              |              |              |        |
| 23 | <1 portion/day                    | 246 (66.13)  | 23 (6.18)    | 103 (27.69)  | 0.903  | 257 (55.75)  | 66 (14.32)   | 138 (29.93)  | 0.438  |
| 24 | 1-4 portions/day                  | 403 (65.53)  | 40 (6.50)    | 172 (27.97)  |        | 485 (60.40)  | 108 (13.45)  | 210 (26.15)  |        |
| 25 | ≥5 portions/day                   | 111 (67.68)  | 7 (4.27)     | 46 (28.05)   |        | 135 (57.20)  | 29 (12.29)   | 72 (30.51)   |        |
| 26 |                                   |              |              |              |        |              |              |              |        |
| 27 | Physical Activity                 |              |              |              |        |              |              |              |        |
| 28 |                                   |              |              |              |        |              |              |              |        |
| 29 | Never                             | 288 (63.86)  | 40 (8.87)    | 123 (27.27)  | 0.016  | 319 (52.21)  | 119 (19.48)  | 173 (28.31)  | <0.001 |
| 30 | ≤3h/week                          | 272 (65.70)  | 17 (4.11)    | 125 (30.19)  |        | 302 (59.80)  | 46 (9.11)    | 157 (31.09)  |        |
| 31 | >3h/week                          | 200 (70.42)  | 12 (4.23)    | 72 (25.35)   |        | 254 (66.67)  | 38 (9.97)    | 89 (23.36)   |        |
| 32 |                                   |              |              |              |        |              |              |              |        |
| 33 | BMI                               | 26.50 ± 5.00 | 27.64 ± 4.61 | 25.82 ± 4.62 | 0.0097 | 26.57 ± 5.06 | 27.56 ± 5.38 | 26.13 ± 4.78 | 0.004  |
| 34 | <25                               | 329 (65.93)  | 18 (3.61)    | 152 (30.46)  | 0.008  | 382 (59.50)  | 72 (11.21)   | 188 (29.28)  | 0.183  |
| 35 |                                   |              |              |              |        |              |              |              |        |
| 36 |                                   |              |              |              |        |              |              |              |        |
| 37 |                                   |              |              |              |        |              |              |              |        |
| 38 |                                   |              |              |              |        |              |              |              |        |
| 39 |                                   |              |              |              |        |              |              |              |        |
| 40 |                                   |              |              |              |        |              |              |              |        |
| 41 |                                   |              |              |              |        |              |              |              |        |
| 42 |                                   |              |              |              |        |              |              |              |        |
| 43 |                                   |              |              |              |        |              |              |              |        |
| 44 |                                   |              |              |              |        |              |              |              |        |
| 45 |                                   |              |              |              |        |              |              |              |        |
| 46 |                                   |              |              |              |        |              |              |              |        |
| 47 |                                   |              |              |              |        |              |              |              |        |



1  
2  
3  
4  
5  
6  
7  
8  
9  
10  
11  
12  
13  
14  
15  
16  
17  
18  
19  
20  
21  
22  
23  
24  
25  
26  
27  
28  
29  
30  
31  
32  
33  
34  
35  
36  
37  
38  
39  
40  
41  
42  
43  
44  
45  
46  
47

|       |             |           |             |             |            |             |
|-------|-------------|-----------|-------------|-------------|------------|-------------|
| 25-30 | 280 (64.22) | 35 (8.03) | 121 (27.75) | 316 (57.14) | 81 (14.65) | 156 (28.21) |
| >=30  | 151 (69.91) | 17 (7.87) | 48 (22.22)  | 179 (58.88) | 49 (16.12) | 76 (25.00)  |

Values are: numbers (%) for categorical variables and means±standard deviation for continuous variables. BMI: Body Mass Index. NA: not available.

<sup>a</sup>  $\chi^2$  test for categorical variables, t-test for continuous variables.

For peer review only

**Table 4.** Results of multinomial logistic regression measuring the association between sleep duration and chronic conditions in models adjusted for participants socioeconomic characteristics and physical activity: European Health Examination Survey in Luxembourg (N =1508).

|                                         | Sleep duration work the next day<br>(N=1,152-working) |                   |                    |                   | Sleep duration do NOT work the next day<br>(N=1,501) |                   |                     |                   |
|-----------------------------------------|-------------------------------------------------------|-------------------|--------------------|-------------------|------------------------------------------------------|-------------------|---------------------|-------------------|
|                                         | Short (<6hrs/night)                                   |                   | Long (>7hrs/night) |                   | Short (<7hrs/night)                                  |                   | Long (>8 hrs/night) |                   |
|                                         | OR (95% CI)                                           | AOR (95% CI)      | OR (95% CI)        | AOR (95% CI)      | OR (95% CI)                                          | AOR (95% CI)      | OR (95% CI)         | AOR (95% CI)      |
| Chronic conditions/diseases             |                                                       |                   |                    |                   |                                                      |                   |                     |                   |
| 0                                       | 1                                                     | 1                 | 1                  | 1                 | 1                                                    | 1                 | 1                   | 1                 |
| 1                                       | 1.51 (0.66, 3.46)                                     | 1.50 (0.65, 3.50) | 0.90 (0.64, 1.26)  | 0.91 (0.64, 1.28) | 1.53 (0.88-2.63)                                     | 1.48 (0.84-2.59)  | 0.79 (0.58, 1.08)   | 0.84 (0.61, 1.16) |
| 2                                       | 3.34 (1.52, 7.33)                                     | 3.07 (1.36, 6.92) | 0.95 (0.65, 1.40)  | 0.94 (0.63, 1.40) | 2.63 (1.54, 4.50)                                    | 2.35 (1.34, 4.12) | 0.88 (0.62, 1.24)   | 1.01 (0.70, 1.44) |
| ≥3                                      | 3.68 (1.75, 7.69)                                     | 3.70 (1.66, 8.22) | 0.89 (0.62, 1.27)  | 0.82 (0.56, 1.21) | 3.84 (2.39, 6.15)                                    | 2.85 (1.69, 4.81) | 0.74 (0.54, 1.01)   | 0.98 (0.70, 1.38) |
| Immigration                             |                                                       |                   |                    |                   |                                                      |                   |                     |                   |
| Luxembourg                              |                                                       | 1                 |                    | 1                 |                                                      | 1                 |                     | 1                 |
| Portugal                                |                                                       | 2.13 (1.01-4.48)  |                    | 0.85 (0.53-1.37)  |                                                      | 1.77 (1.07-2.93)  |                     | 1.15 (0.76-1.73)  |
| Other                                   |                                                       | 1.72 (0.93-3.20)  |                    | 0.92 (0.68-1.25)  |                                                      | 2.47 (1.68-3.64)  |                     | 1.28 (0.97-1.69)  |
| Sex                                     |                                                       |                   |                    |                   |                                                      |                   |                     |                   |
| Men                                     |                                                       | 1                 |                    | 1                 |                                                      | 1                 |                     | 1                 |
| Women                                   |                                                       | 0.63 (0.36-1.09)  |                    | 1.79 (1.36-2.36)  |                                                      | 0.79 (0.56-1.12)  |                     | 1.28 (1.00-1.64)  |
| Age                                     |                                                       | 1.00 (0.97-1.03)  |                    | 1.00 (0.98-1.01)  |                                                      | 1.00 (0.98-1.02)  |                     | 0.97 (0.96-0.99)  |
| Education                               |                                                       |                   |                    |                   |                                                      |                   |                     |                   |
| Primary                                 |                                                       | 1                 |                    | 1                 |                                                      | 1                 |                     | 1                 |
| Secondary                               |                                                       | 0.80 (0.40-1.59)  |                    | 0.96 (0.62-1.50)  |                                                      | 0.58 (0.38-0.88)  |                     | 0.85 (0.59-1.23)  |
| Tertiary                                |                                                       | 0.45 (0.17-1.18)  |                    | 0.94 (0.55-1.60)  |                                                      | 0.31 (0.17-0.56)  |                     | 0.76 (0.48-1.19)  |
| Job status                              |                                                       |                   |                    |                   |                                                      |                   |                     |                   |
| Unemployed                              |                                                       |                   |                    |                   |                                                      | 1                 |                     | 1                 |
| managers/professionals                  |                                                       | 1                 |                    | 1                 |                                                      | 0.59 (0.33-1.04)  |                     | 1.92 (1.24-2.96)  |
| technicians/clerical/service occupation |                                                       | 1.46 (0.68-3.11)  |                    | 0.88 (0.62-1.26)  |                                                      | 0.59 (0.37-0.94)  |                     | 1.83 (1.23-2.73)  |
| skilled/unskilled workers               |                                                       | 0.97 (0.39-2.42)  |                    | 1.07 (0.66-1.75)  |                                                      | 0.44 (0.26-0.74)  |                     | 2.10 (1.34-3.30)  |
| Physical Activity                       |                                                       |                   |                    |                   |                                                      |                   |                     |                   |

1  
2  
3  
4  
5  
6  
7  
8  
9  
10  
11  
12  
13  
14  
15  
16  
17  
18  
19  
20  
21  
22  
23  
24  
25  
26  
27  
28  
29  
30  
31  
32  
33  
34  
35  
36  
37  
38  
39  
40  
41  
42  
43  
44  
45  
46  
47

|          |                  |                  |                  |                  |
|----------|------------------|------------------|------------------|------------------|
| Never    | 1                | 1                | 1                | 1                |
| ≤3h/week | 0.61 (0.33-1.14) | 1.09 (0.79-1.50) | 0.60 (0.40-0.91) | 0.96 (0.72-1.28) |
| >3h/week | 0.59 (0.29-1.19) | 0.93 (0.65-1.33) | 0.54 (0.34-0.83) | 0.70 (0.51-0.97) |

Note. OR: Odds ratio; AOR: Adjusted Odds ratio; 95% CI: 95% confidence interval.

For peer review only

**Supplementary Table S1.** Sleep problems and duration by chronic conditions/diseases: European Health Examination Survey in Luxembourg.

| Variables                                                | Total       | Chronic diseases /conditions |             |             |             | P      |
|----------------------------------------------------------|-------------|------------------------------|-------------|-------------|-------------|--------|
|                                                          |             | 0                            | 1           | 2           | ≥3          |        |
| Diagnosis of sleep disorder (N=1486)                     | 122 (8.21)  | 11 (9.02)                    | 13 (10.66)  | 22 (18.03)  | 76 (62.30)  | <0.001 |
| Sleepiness                                               | 118 (7.89)  | 25 (21.19)                   | 26 (22.03)  | 18 (15.25)  | 49 (41.53)  | 0.071  |
| Have difficulties in sleeping the night through (N=1505) | 510 (33.89) | 84 (16.63)                   | 79 (15.64)  | 93 (18.42)  | 249 (49.31) |        |
| Sleep duration                                           |             |                              |             |             |             |        |
| Num sleep hours when you have to work the next day       |             |                              |             |             |             |        |
| (N=1,152-working)                                        |             |                              |             |             |             |        |
| <6h                                                      | 70 (6.08)   | 10 (14.29)                   | 13 (18.57)  | 19 (27.14)  | 28 (40.00)  | 0.006  |
| 6-7h                                                     | 761 (66.06) | 232 (30.73)                  | 206 (27.28) | 133 (17.62) | 184 (24.37) |        |
| ≥8h                                                      | 321 (27.86) | 103 (32.09)                  | 87 (27.10)  | 56 (17.45)  | 75 (23.36)  |        |
| Num sleep hours when you do NOT work the next day        |             |                              |             |             |             |        |
| (N=1,501)                                                |             |                              |             |             |             |        |
| ≤6h                                                      | 203 (13.52) | 25 (12.38)                   | 34 (16.83)  | 43 (21.29)  | 100 (49.50) | <0.001 |
| 7-8h                                                     | 878 (58.49) | 245 (28.00)                  | 227 (25.94) | 150 (17.14) | 253 (28.91) |        |
| >8h                                                      | 420 (27.98) | 133 (31.89)                  | 100 (23.98) | 75 (17.99)  | 109 (26.14) |        |

1  
2  
3  
4  
5  
6  
7  
8  
9  
10  
11  
12  
13  
14  
15  
16  
17  
18  
19  
20  
21  
22  
23  
24  
25  
26  
27  
28  
29  
30  
31  
32  
33  
34  
35  
36  
37  
38  
39  
40  
41  
42  
43  
44  
45  
46

Values are: numbers (%) <sup>a</sup>  $\chi^2$  test for categorical variable

For peer review only

1  
2  
3  
4  
5  
6  
7  
8  
9  
10  
11  
12  
13  
14  
15  
16  
17  
18  
19  
20  
21  
22  
23  
24  
25  
26  
27  
28  
29  
30  
31  
32  
33  
34  
35  
36  
37  
38  
39  
40  
41  
42  
43  
44  
45  
46

For peer review only

STROBE Statement—Checklist of items that should be included in reports of *cross-sectional studies*

|                              | <b>Item No</b> | <b>Recommendation</b>                                                                                                                                                                                        | <b>Page No</b> |
|------------------------------|----------------|--------------------------------------------------------------------------------------------------------------------------------------------------------------------------------------------------------------|----------------|
| <b>Title and abstract</b>    | 1              | (a) Indicate the study's design with a commonly used term in the title or the abstract                                                                                                                       | 3              |
|                              |                | (b) Provide in the abstract an informative and balanced summary of what was done and what was found                                                                                                          | 3              |
| <b>Introduction</b>          |                |                                                                                                                                                                                                              |                |
| Background/rationale         | 2              | Explain the scientific background and rationale for the investigation being reported                                                                                                                         | 5              |
| Objectives                   | 3              | State specific objectives, including any prespecified hypotheses                                                                                                                                             | 6              |
| <b>Methods</b>               |                |                                                                                                                                                                                                              |                |
| Study design                 | 4              | Present key elements of study design early in the paper                                                                                                                                                      | 6              |
| Setting                      | 5              | Describe the setting, locations, and relevant dates, including periods of recruitment, exposure, follow-up, and data collection                                                                              | 6              |
| Participants                 | 6              | (a) Give the eligibility criteria, and the sources and methods of selection of participants                                                                                                                  | 6              |
| Variables                    | 7              | Clearly define all outcomes, exposures, predictors, potential confounders, and effect modifiers. Give diagnostic criteria, if applicable                                                                     | 6-7            |
| Data sources/<br>measurement | 8*             | For each variable of interest, give sources of data and details of methods of assessment (measurement). Describe comparability of assessment methods if there is more than one group                         | 6-7            |
| Bias                         | 9              | Describe any efforts to address potential sources of bias                                                                                                                                                    | 8, 12          |
| Study size                   | 10             | Explain how the study size was arrived at                                                                                                                                                                    | 6              |
| Quantitative variables       | 11             | Explain how quantitative variables were handled in the analyses. If applicable, describe which groupings were chosen and why                                                                                 | 6-8            |
| Statistical methods          | 12             | (a) Describe all statistical methods, including those used to control for confounding                                                                                                                        | 8              |
|                              |                | (b) Describe any methods used to examine subgroups and interactions                                                                                                                                          |                |
|                              |                | (c) Explain how missing data were addressed                                                                                                                                                                  | 8              |
|                              |                | (d) If applicable, describe analytical methods taking account of sampling strategy                                                                                                                           |                |
|                              |                | (e) Describe any sensitivity analyses                                                                                                                                                                        |                |
| <b>Results</b>               |                |                                                                                                                                                                                                              |                |
| Participants                 | 13*            | (a) Report numbers of individuals at each stage of study—eg numbers potentially eligible, examined for eligibility, confirmed eligible, included in the study, completing follow-up, and analysed            | 6              |
|                              |                | (b) Give reasons for non-participation at each stage                                                                                                                                                         |                |
|                              |                | (c) Consider use of a flow diagram                                                                                                                                                                           |                |
| Descriptive data             | 14*            | (a) Give characteristics of study participants (eg demographic, clinical, social) and information on exposures and potential confounders                                                                     | Table 2 and 3  |
|                              |                | (b) Indicate number of participants with missing data for each variable of interest                                                                                                                          |                |
| Outcome data                 | 15*            | Report numbers of outcome events or summary measures                                                                                                                                                         | 8              |
| Main results                 | 16             | (a) Give unadjusted estimates and, if applicable, confounder-adjusted estimates and their precision (eg, 95% confidence interval). Make clear which confounders were adjusted for and why they were included | Table 4        |

|                          |    |                                                                                                                                                                            |      |
|--------------------------|----|----------------------------------------------------------------------------------------------------------------------------------------------------------------------------|------|
|                          |    | (b) Report category boundaries when continuous variables were categorized                                                                                                  | 7-8  |
|                          |    | (c) If relevant, consider translating estimates of relative risk into absolute risk for a meaningful time period                                                           |      |
| Other analyses           | 17 | Report other analyses done—eg analyses of subgroups and interactions, and sensitivity analyses                                                                             |      |
| <b>Discussion</b>        |    |                                                                                                                                                                            |      |
| Key results              | 18 | Summarise key results with reference to study objectives                                                                                                                   | 9    |
| Limitations              | 19 | Discuss limitations of the study, taking into account sources of potential bias or imprecision. Discuss both direction and magnitude of any potential bias                 | 11   |
| Interpretation           | 20 | Give a cautious overall interpretation of results considering objectives, limitations, multiplicity of analyses, results from similar studies, and other relevant evidence | 9-11 |
| Generalisability         | 21 | Discuss the generalisability (external validity) of the study results                                                                                                      | 12   |
| <b>Other information</b> |    |                                                                                                                                                                            |      |
| Funding                  | 22 | Give the source of funding and the role of the funders for the present study and, if applicable, for the original study on which the present article is based              | 6    |

\*Give information separately for exposed and unexposed groups.

**Note:** An Explanation and Elaboration article discusses each checklist item and gives methodological background and published examples of transparent reporting. The STROBE checklist is best used in conjunction with this article (freely available on the Web sites of PLoS Medicine at <http://www.plosmedicine.org/>, Annals of Internal Medicine at <http://www.annals.org/>, and Epidemiology at <http://www.epidem.com/>). Information on the STROBE Initiative is available at [www.strobe-statement.org](http://www.strobe-statement.org).



# BMJ Open

## SLEEP DURATION AND MULTIMORBIDITY IN LUXEMBOURG. RESULTS FROM THE EUROPEAN HEALTH EXAMINATION SURVEY IN LUXEMBOURG, 2013-2015

|                                 |                                                                                                                                                                                                                                                                                                                                                                                                                                                                                                                                                                                                                                                                                                                                          |
|---------------------------------|------------------------------------------------------------------------------------------------------------------------------------------------------------------------------------------------------------------------------------------------------------------------------------------------------------------------------------------------------------------------------------------------------------------------------------------------------------------------------------------------------------------------------------------------------------------------------------------------------------------------------------------------------------------------------------------------------------------------------------------|
| Journal:                        | <i>BMJ Open</i>                                                                                                                                                                                                                                                                                                                                                                                                                                                                                                                                                                                                                                                                                                                          |
| Manuscript ID                   | bmjopen-2018-026942.R1                                                                                                                                                                                                                                                                                                                                                                                                                                                                                                                                                                                                                                                                                                                   |
| Article Type:                   | Research                                                                                                                                                                                                                                                                                                                                                                                                                                                                                                                                                                                                                                                                                                                                 |
| Date Submitted by the Author:   | 12-Jun-2019                                                                                                                                                                                                                                                                                                                                                                                                                                                                                                                                                                                                                                                                                                                              |
| Complete List of Authors:       | Ruiz-Castell, Maria; Luxembourg Institute of Health, Epidemiology and Public Health Research Unit, Department of Population Health<br>Makovski, Tatjana; Luxembourg Institute of Health, Epidemiology and Public Health Research Unit, Department of Population Health; Care and Public Health Research Institute, Maastricht University, Department of Family medicine<br>Bocquet, Valéry; Luxembourg Institute of Health, Competence Center in Methodology and Statistics, Department of Population Health<br>Stranges, Saverio; , Schulich School of Medicine & Dentistry, Western University, Department of Epidemiology & Biostatistics; Schulich School of Medicine & Dentistry, Western University, Department of Family Medicine |
| <b>Primary Subject Heading</b>: | Epidemiology                                                                                                                                                                                                                                                                                                                                                                                                                                                                                                                                                                                                                                                                                                                             |
| Secondary Subject Heading:      | Public health                                                                                                                                                                                                                                                                                                                                                                                                                                                                                                                                                                                                                                                                                                                            |
| Keywords:                       | EPIDEMIOLOGY, PUBLIC HEALTH, SLEEP MEDICINE                                                                                                                                                                                                                                                                                                                                                                                                                                                                                                                                                                                                                                                                                              |
|                                 |                                                                                                                                                                                                                                                                                                                                                                                                                                                                                                                                                                                                                                                                                                                                          |

SCHOLARONE™  
Manuscripts

1  
2  
3 **SLEEP DURATION AND MULTIMORBIDITY IN LUXEMBOURG. RESULTS FROM**  
4 **THE EUROPEAN HEALTH EXAMINATION SURVEY IN LUXEMBOURG, 2013-2015**

5 Maria Ruiz-Castell, PhD<sup>1</sup>, Tatjana T. Makovski, MD<sup>1,2,3</sup>, Valéry Bocquet, PhD<sup>4</sup>, Saverio Stranges,  
6 MD, PhD<sup>1,5,6</sup>  
7  
8  
9

10 <sup>1</sup> Epidemiology and Public Health Research Unit, Department of Population Health, Luxembourg  
11 Institute of Health (LIH), Strassen, Luxembourg  
12  
13

14 <sup>2</sup> Department of Family medicine, Care and Public Health Research Institute, Maastricht University,  
15 Maastricht, the Netherlands  
16  
17

18 <sup>3</sup> Chairgroup of Complex Genetics and Epidemiology, Care and Public Health Research Institute,  
19 Maastricht University, Maastricht, the Netherlands  
20  
21

22 <sup>4</sup> Competence Center in Methodology and Statistics, Department of Population Health,  
23 Luxembourg Institute of Health (LIH), Strassen, Luxembourg  
24  
25

26 <sup>5</sup> Department of Epidemiology & Biostatistics, Schulich School of Medicine & Dentistry, Western  
27 University, London, Ontario, Canada  
28  
29

30 <sup>6</sup> Department of Family Medicine, Schulich School of Medicine & Dentistry, Western University,  
31 London, Ontario, Canada  
32  
33

34  
35  
36 **Corresponding author:** Maria Ruiz-Castell; Luxembourg Institute of Health, Department of  
37 Population Health. 1A-B, rue Thomas Edison, L-1445 Strassen. Luxembourg; [Maria.Ruiz@lih.lu](mailto:Maria.Ruiz@lih.lu);  
38 Telephone number: +352 26970-746  
39  
40

41 Fax: +352 26970-719  
42  
43  
44  
45  
46

47 **Word count:** 3401; **Abstract:** 202; **Tables:** 4; **References:** 43  
48

49 **Funding:** The study was funded by the Directorate and Ministry of Health and the Luxembourg  
50 Institute of Health.  
51  
52  
53

54 **Conflict of interest:** The authors declare that they have no conflict of interest.  
55  
56  
57  
58  
59  
60

## Contributorship statement

MRC and SS conceptualized and designed the study. MRC and VB performed the statistical analysis. MRC, SS and T.T.M interpreted the data. MRC drafted the article. SS supervised the study. All authors participated in the revision of the article. All authors contributed to and have approved the final manuscript.

For peer review only

## Abstract

**Objectives:** We estimated the prevalence of short sleep duration and multimorbidity in Luxembourg, and assessed whether sleep duration was associated with multimorbidity after adjusting for socio-demographic and behavioral characteristics.

**Design:** Cross-sectional study.

**Participants:** Data from 1508 Luxembourg residents (48% men and 52% women) aged 25 to 64 years came from the European Health Examination Survey 2013-2015.

**Outcome measures:** Short sleep duration and multimorbidity.

**Results:** Participants reported sleeping 6.95hrs/night during work days, nearly 1hr less than during non-work days (7.86hrs/night). Nearly half of participants reported having been diagnosed with  $\geq 2$  chronic conditions/diseases. Short sleep duration was linearly associated with the number of chronic conditions when participants did not have to work the next day (OR: 1.93, 95% CI: 1.09, 3.40 and OR: 1.77, 95% CI: 1.02, 3.07 for 2, and  $\geq 3$  chronic conditions/diseases, respectively), independently of socioeconomic and behavioral characteristics. The effect was stronger when participants had to work the next day (OR: 2.89, 95% CI: 1.27, 6.56, and OR: 2.98, 95% CI: 1.30, 6.87, for 2 and  $\geq 3$  chronic conditions/diseases, respectively).

**Conclusions:** Health promotion programs should aim at improving and promoting healthy sleeping and its possible benefits on chronic disease outcomes, which in turn can help reducing the risk of multimorbidity in middle-aged adults.

**Keywords:** Sleep duration; multimorbidity; chronic diseases; Luxembourg; European Health Examination Survey

1  
2  
3 ***Strengths and limitations of this study***  
4  
5

- 6
- 7 • This is the first study in Luxembourg on the prevalence of sleep patterns, with a focus on  
8 short and long sleep duration, and their relationship with multimorbidity.
  - 9 • The present study was drawn from the European Health Examination Survey in  
10 Luxembourg (EHES-LUX), a representative cross-sectional population-based survey.
  - 11 • Limitations of the present study include the subjective self-reported measure of sleep  
12 duration, the cross-sectional design of the study (not allowing to establish a causal link),  
13 and the low participation rate.  
14  
15  
16  
17  
18  
19  
20  
21

22 ***Data sharing statement:*** Extra data can be accessed by emailing Dr Laetitia Huiart, Head of the  
23 Population Health Department, LIH (laetitia.huiart@lih.lu) and the Principal Investigator of EHES-  
24 LUX2013-2015, Dr Maria Ruiz-Castell (maria.ruiz@lih.lu) and fill out a request form.  
25  
26  
27  
28  
29  
30  
31  
32  
33  
34  
35  
36  
37  
38  
39  
40  
41  
42  
43  
44  
45  
46  
47  
48  
49  
50  
51  
52  
53  
54  
55  
56  
57  
58  
59  
60

## Introduction

A healthy lifestyle includes healthy sleep habits. Sleep patterns influence several physiological and psychological processes such as inflammation, immune responses, mental and cognitive function, glucose regulation and energy balance (1-3). Short sleep duration, poor sleep quality, and sleep-related disorders can result in sleep deficiency and impact on individual health (4). According to the Centers for Disease Control and Prevention (CDC), insufficient sleep is associated with health problems such as chronic diseases, poor quality of life, mental health, risk of accidents, and lower productivity at work (5). Adequate sleep duration is one of the dimensions needed for good sleep health (6). The American Academy of Sleep Medicine and Sleep Research Society considers that for an adult an average sleep duration of at least 7 hours per night should be recommended (4). However, a high percentage of the population sleeps less than the recommended 7 hours (7). Several factors may affect sleep such as physical activity patterns or eating behaviors, but also socioeconomic factors including job status, marital status and ethnicity (8, 9). Studies have observed an association of lower education and unemployment with both short and long sleep duration (10, 11), while factors such as physical activity and healthy diet seem to improve sleep quality (12, 13). Moreover, diet intake (energy and total fat intake) and nutrients seem to be associated with both short and long sleep duration through multifactorial factors including eating patterns (e.g., time and hours of intake) and variations in hormones related to appetite, such as leptin (14).

Epidemiologic data suggest an association of abnormal sleep duration and poor sleep quality with cardiometabolic problems (e.g. hypertension, diabetes, obesity, cardiovascular diseases), mental disorders (e.g. depression), and mortality (15-18). The observed relationship between short sleep duration and mortality would be especially critical in adults under 65 years of age (18). Few studies so far have focused on possible relationships between sleep patterns and multimorbidity (19, 20). Multimorbidity is defined as the presence of two or more chronic diseases in the same individual (21), and is associated with disability, functional decline, frailty, poor quality of life and mortality (22). In the context of ageing societies, multimorbidity is an increasing global phenomenon (23); its occurrence usually increases with age, though a large proportion of individuals younger than 65 are also affected (24). Definitions of multimorbidity vary, however, and the prevalence differs based on changing definitions, which in turn present significant challenges when attempting to compare results between populations and studies (22).

1  
2  
3 The aim of the present study was to estimate the prevalence of short sleep duration and  
4 multimorbidity in Luxembourg, as well as to assess whether sleep duration was associated with  
5 multimorbidity after adjusting for socio-demographic and behavioral characteristics.  
6  
7

## 8 9 **Methods**

### 10 11 *Study population and recruitment*

12  
13 Data were drawn from the European Health Examination Survey in Luxembourg (EHES-LUX).  
14 EHES-LUX is a representative cross-sectional population-based survey carried out by the  
15 Luxembourg Institute of Health with the objectives of assessing the health status of the population  
16 of the Grand-Duchy of Luxembourg, develop national and European health indicators, identify the  
17 needs of the population, and evaluate health behaviors. EHES-LUX was conducted between  
18 February 2013 and January 2015. Individuals were randomly selected in a one-stage sampling  
19 procedure from the national health insurance registry (95% social coverage). Institutionalized  
20 individuals (e.g. hospitals, elderly homes) were not included. A total of 1508 residents (excluding  
21 21 pregnant women) of Luxembourg aged 25 to 64 participated in the survey (participation rate of  
22 24.1%) (25). Of them, 7 participants did not reported their sleep habits. A total of 1501 participants  
23 had information on multimorbidity and sleep habits. Participants signed an informed consent and  
24 were interviewed by trained nurses who also conducted medical examinations. Questionnaires  
25 included several health modules (e.g. sleep and nutritional habits, health care, working and living  
26 conditions) as well as demographic and socioeconomic characteristics. Medical examinations  
27 included measurements such as blood pressure and anthropometry. Sampling weights were  
28 calculated to be generalized to the population of Luxembourg in terms of age, sex and district of  
29 residence. The study national research ethics committee (Comité national d'éthique de Recherche-  
30 CNER) approved the study and it was notified to the Luxemburgish National Commission for Data  
31 Protection.  
32  
33

### 34 35 *Patient involvement*

36  
37 Participants were not involved in the development of the research question, study design,  
38 recruitment or the conduction of the study. Upon request, results from the medical examination  
39 were forwarded to the study participants and their medical doctors. General results were presented  
40 to the general public in a range of dissemination activities.  
41  
42

### 43 44 *Sleep*

45  
46 Sleep duration was assessed using two questions: 1) "How many hours do you normally sleep at  
47 night when you have to work the next day?", and 2) "How many hours do you normally sleep at  
48  
49  
50  
51  
52  
53  
54  
55  
56  
57  
58  
59  
60

1  
2  
3 night when you don't have to work the next day?". Responses to the first question were categorized  
4 as short sleep duration (<6hrs/night), medium sleep duration (6-8hrs/night), and long sleep duration  
5 (>8hrs/night), in line with previously published studies (8, 26, 27). Responses to the second  
6 question were categorized in short sleep duration ( $\leq$ 6hrs/night), medium sleep duration (7-  
7 8hrs/night), and long sleep duration (>8hrs/night) . The main reason why we used two different  
8 cutoffs was due to the marked difference observed between sleep hours during workdays and  
9 non-work days (approximately one-hour difference). Therefore, the number of participants who  
10 were at the extremes (e.g. < 6 hours and >8hours during the days when not having to work the  
11 next day) had very small sample size.

12 Sleep disorders and sleep quality were assessed with the following variables: difficulty in sleeping  
13 the night, diagnosis of sleep disorders, sleep medication and sleepiness. Difficulty in sleeping the  
14 night was assessed based on the question "Do you have difficulties in sleeping through the night?".  
15 Diagnosis of sleep disorders was assessed using the question "Have you ever been told by a doctor  
16 or another health professional that you have a sleep disorder?". Sleep medications were assessed  
17 using the question "In the past 2 weeks, have you used other types of medicines that were  
18 prescribed to you ?". The question was aimed at answering about several medications including  
19 sleep tablets. Sleepiness was defined as a score of  $\geq$ 11 on the Epworth Sleepiness Scale (28).

### 20 *Multimorbidity*

21 Participants were asked if they ever had a chronic disease or condition diagnosed by a medical  
22 doctor (e.g., hypertension, high cholesterol, diabetes, cardiovascular diseases, stomach or duodenal  
23 ulcer, cirrhosis or other liver disease, urinary incontinence, kidney problems, chronic back or neck  
24 disorder, rheumatoid arthritis, arthrosis, osteoporosis, cancer, severe headache as migraine or  
25 chronic anxiety). Cardiovascular diseases included coronary heart disease or angina pectoris, heart  
26 attack or its chronic consequences, stroke or its chronic consequences. Based on this information,  
27 the variable "ever being diagnosed with a chronic disease or condition" was generated with four  
28 categories: 0, 1, 2 and  $\geq$ 3 chronic disease or condition. Multimorbidity was defined as having two  
29 or more chronic diseases or conditions diagnosed by a medical doctor.

### 30 *Explanatory variables*

31 Sociodemographic characteristics included age, sex and immigration status. As Portuguese are the  
32 largest immigrant community in Luxembourg, immigration status was categorized in non-  
33 immigrant, immigrant born in Portugal, and immigrant born in other countries. Socioeconomic  
34 status included education (primary, secondary and tertiary education completed) and job status  
35  
36  
37  
38  
39  
40  
41  
42  
43  
44  
45  
46  
47  
48  
49  
50



(unemployed; managers/professionals; technical/clerical/service occupation; skilled/unskilled workers).

Lifestyles included smoking (never; current; ex-smokers), alcohol consumption (never; ex-drinkers; drinkers), physical activity (never;  $\leq 3$ hrs/week of sports, fitness, and/or recreational activities which lasted at least 10 consecutive minutes;  $>3$ hrs/week of sports, fitness, and/or recreational activities which lasted at least 10 consecutive minutes), and vegetable and fruit consumption ( $< 1$  portion/ day, 1–4 portions/day,  $\geq 5$  portions/day). Weight and height were measured by trained nurses and used to calculate body mass index (BMI;  $\text{kg}/\text{m}^2$ ). BMI was categorized as normal body weight ( $<25 \text{ kg}/\text{m}^2$ ), overweight ( $25\text{-}29.99 \text{ kg}/\text{m}^2$ ) and obesity ( $\geq 30 \text{ kg}/\text{m}^2$ ).

### *Statistical data analysis*

Means and frequencies were used for descriptive purposes. We calculated the prevalence of sleep disorders, short and long sleep duration, chronic conditions/diseases and multimorbidity.

Percentages did not include missing values. A chi-square test ( $\chi^2$ ) or Student t-test were used to analyze associations between the prevalence of sleep duration and covariates and the prevalence of multimorbidity and covariates. The association between sleep duration and chronic conditions/diseases was assessed using multinomial logistic regression models (reference for sleep duration when having to work the next day was 6-8hrs per night and reference for sleep duration when not having to work the next day was 7-8hrs) adjusted for sociodemographic characteristics, behavioural risk factors (e.g. BMI, smoking, alcohol consumption and physical activity), as well as for measures of sleep disorders and sleep quality. We did sensitivity analysis using the same categories for sleep duration for working days and days when not having to work the following day ( $<6$ hrs/night; 6-8hrs/night;  $>8$ hrs/night). We considered a  $P < 0.05$  statistically significant. To be representative of the population and avoid biased estimates, the observations were weighted.

Participants with missing values on sleep habits and or multimorbidity were not included in the present analysis. Analyses were performed using STATA 14.0 and SAS version 9.4 (SAS Institute Inc., Cary, NC, USA).

## **Results**

**Table 1** shows the prevalence of chronic conditions/diseases, multimorbidity, sleep duration and sleep disorders. Nearly half of participants reported being diagnosed with two or more chronic conditions/ diseases, and nearly a third of participants reported being diagnosed with three or more chronic conditions/diseases. The most prevalent diseases were chronic low back disorder or other chronic back defect followed by hypercholesterolemia, arthrosis and hypertension. More than 8% of participants were diagnosed with a sleep disorder, a third reported having difficulties in sleeping

1  
2  
3 through the night and 4.3% reported taking sleep medication. Participants reported sleeping  
4 7.86hrs/night when they did not have to work the next day, nearly one hour more than when they  
5 had to work the next day (6.95hrs/night). Moreover, 6.08% of the Luxembourg population reported  
6 sleeping less than 6 hours during working days, a percentage that was reduced to almost half  
7 (3.93%) when participants did not have to work the next day.  
8  
9

10  
11 Participant characteristics by chronic conditions/diseases are shown in **Table 2**. More men than  
12 women presented three or more chronic diseases. Higher number of chronic diseases/conditions  
13 increased with age: those aged 55 to 64 presented more chronic conditions compared to those aged  
14 25-34. Immigrants born in Portugal presented more chronic conditions than non-immigrants and  
15 other immigrants. Participants being less educated and unemployed presented more chronic  
16 conditions compared to those employed and highly educated. Participants being less physically  
17 active and with obesity presented more chronic conditions/diseases than those being more  
18 physically active and with a lower BMI.  
19

20  
21 Participant characteristics by sleep duration are shown in **Table 3**. When participants had to work  
22 the following day, more men than women reported a medium sleep duration. Short sleep duration  
23 was more likely among immigrants born in Portugal, participants with lower education and  
24 skilled/unskilled workers. Short sleep duration was less common among those being physically  
25 active and with a BMI less than 25 Kg/m<sup>2</sup>. When participants did not have to work the next day,  
26 short sleep duration was more common among older individuals, immigrants born in Portugal,  
27 unemployed people, and those being less physically active. Long sleep duration was observed  
28 among participants with lower education. No differences in sleep duration were observed between  
29 men and women.  
30

31  
32 **Table 4** shows results from multinomial logistic regression analyses examining the association  
33 between sleep duration and chronic conditions/diseases, and adjusted by sociodemographic  
34 characteristics, behavioural risk factors, socioeconomic position, as well as for measures of sleep  
35 disorders and sleep quality. Among participants who reported sleep hours when they did not have to  
36 work the next day, those sleeping less hours ( $\leq 6$ h) were 1.93 and 1.77 times as likely to report  
37 having 2 and 3 or more chronic conditions after adjusting for covariates. In fully adjusted models,  
38 the strength of associations between sleep duration and multimorbidity remained statistically  
39 significant. The same association (although more accentuated) was observed in those participant  
40 with a job at the moment of the survey who reported the number of sleep hours when they had to  
41 work the next day: those sleeping less hours ( $< 6$ h) were 2.89 and 2.98 times as likely to report  
42 having 2 and 3 or more chronic conditions after adjusting for covariates.  
43  
44  
45  
46  
47  
48  
49  
50  
51  
52  
53  
54  
55  
56  
57  
58  
59  
60

1  
2  
3 Estimates of sleep problems and chronic conditions are presented in **Table S1**. The prevalence of  
4 sleep problems was high, with one out of three participants having difficulties in sleeping the night  
5 through and nearly 8% of participants diagnosed with a sleep disorder. In all cases, the percentage  
6 of participants with sleep problems increased with the number of chronic diseases.  
7  
8

9  
10 Sensitivity analysis examining the association between sleep duration and chronic  
11 conditions/diseases are presented in **Table S2**, using the same cut points for sleep duration  
12 categories for both workdays and non-work days. We observed the same trend as in Table 4 with  
13 consistent associations of short sleep duration with the number of chronic conditions.  
14  
15  
16

## 17 **Discussion**

18  
19  
20 Results from the present nationwide population-based study show for the first time in Luxembourg  
21 the prevalence of sleep patterns, with a focus on short and long sleep duration, as well as their  
22 association with multimorbidity. The prevalence of short sleep duration in Luxembourg is 6.08%  
23 when having to work the following day, and 3.93% when not having to work the following day.  
24  
25 Results are similar to those observed internationally (27, 29), although in countries such as Brazil  
26 the prevalence of short sleep duration was nearly 22% (30), and in Portugal and the United States  
27 values reached up to 20% in 2015-2016 and 11.8% in 2014, respectively (31, 32). However, in the  
28 present study the age range from 25 to 64 years must be considered since it does not include adults  
29 over 65 years old who generally sleep less hours. This means that the overall prevalence of the  
30 Luxembourg population sleeping less than the recommended hours is likely to be higher, when  
31 including older adults as well.  
32  
33

34  
35  
36 Multimorbidity is highly prevalent in Luxembourg, especially when taking into account the fact that  
37 the study population was up to 65 years, which represents a relatively young population, as  
38 multimorbidity prevalence naturally increases with age (22). Nearly half of participants had two or  
39 more chronic diseases and 31% had three or more chronic diseases/conditions.  
40  
41

42  
43  
44 In our study, we observed that short sleep duration was significantly associated with the number of  
45 chronic conditions independently of socioeconomic, behavioral characteristics and sleep disorders,  
46 an effect accentuated during working days, when sleep hours are reduced. Our results are in line  
47 with those from other studies that observed an association between sleep and number of chronic  
48 diseases, although previous studies have been usually performed in populations of older adults (e.g.  
49 over 50 years old) (19, 33). As observed by Koyanagi et al., sleep problems increase with the  
50 number of diseases in both low and high income countries independent of their economic  
51 development (19). These associations could explain the observed relationship between sleep  
52 duration (under the recommended 7 hours) and poor sleep quality with mortality, even among  
53  
54  
55  
56  
57  
58  
59  
60

1  
2  
3 adults younger than 65 years old (18). It is not clear if sleep problems are a consequence of chronic  
4 diseases (e.g. conditions affecting sleep) or part of the cause (sleep predispose the individual to  
5 more diseases or exacerbates the symptoms), although it is plausible that both sleep problems and  
6 chronic diseases are linked by a bidirectional association (34). Although both sleep deprivation and  
7 the number of chronic diseases increase with age, and are more prevalent in older adults, our study  
8 shows that the prevalence is also high in adults under 65 and the association begins much earlier. It  
9 is therefore necessary to detect these problems earlier in order to improve individual health and  
10 general wellbeing and reduce mortality, particularly in the context of ageing populations burdened  
11 by the accumulation of multiple chronic conditions over time. In our study, we also observed that  
12 short sleep duration was associated with immigration status, at least for the sleep categories during  
13 non-working days. The relationship between immigration status and sleep patterns remains unclear,  
14 possibly related to stress linked to the migratory process, cultural adaptation, or working conditions  
15 in the host country (35, 36). In our study, Portuguese immigrants were more likely to sleep less than  
16 6h per night during workdays and less than 7h during non-working days. Portuguese are the largest  
17 immigrant community in Luxembourg, accounting for 16% of the 46% immigrant population living  
18 in Luxembourg. Compared to Luxembourgish natives, Portuguese immigrants have a lower  
19 socioeconomic status (37) (including income, education and employment) which could partly  
20 explain why they have a greater likelihood of being short sleepers. However, after adjusting for  
21 sleep disorders the association with short sleep duration was only maintained for non-work-days.  
22 In our study, long sleep duration was more common in women. This was in line with other studies  
23 showing that men usually sleep less hours, although women reported having more sleep problems  
24 (38). However, this relationship is complex and could depend on family composition (e.g. single  
25 parents have shorter sleep duration, particularly women) (39).  
26 In terms of potential mechanisms to corroborate the biological plausibility of the link between short  
27 sleep duration and multimorbidity, sleep deprivation has been associated with a number of chronic  
28 conditions, including cardio-metabolic and neurodegenerative disease, cancer, musculoskeletal  
29 disorders, and mental problems (15, 16). Experimental evidence corroborates the plausibility of  
30 deleterious effects of lack of sleep on endocrine, immune, neurovegetative and inflammatory  
31 pathways (1-3). Sustained sleep deprivation could be related to chronic conditions through its  
32 impact on the circadian rhythm and its association with hormonal (e.g. insulin resistance and  
33 decrease leptin) and autonomic nervous system changes (increase the activity of the sympathetic  
34 nervous system) (40).  
35  
36  
37  
38  
39  
40  
41  
42  
43  
44  
45  
46  
47  
48  
49  
50  
51  
52  
53  
54  
55  
56  
57  
58  
59  
60

1  
2  
3 In addition, sleep deprivation often cluster with other behavioral risk factors such as cigarette  
4 smoking, heavy drinking, and physical inactivity, which may in turn increase the risk of chronic  
5 disease. However, in our study, we only observed an association between physical activity and short  
6 sleep duration during days when not having to work the following day, with no association  
7 observed between short sleep duration and smoking or alcohol consumption. Regular physical  
8 activity would reduce the likelihood of short and/or long sleep duration and maintain an optimal  
9 duration. Studies have observed an association between physical activity and sleep, improving  
10 quality of sleep, sleep efficiency, and total sleep time (12, 41).

11  
12 Limitations of the present study include the subjective measure of sleep duration (self-reported  
13 number of hours of sleep) instead of an objective measure (e.g. actigraphy, polysomnography).  
14 However, in the absence of an objective measure, there is a moderate correlation between objective  
15 and subjective measurements, a correlation that is high during weekdays possibly due to routines  
16 (42), but may be attenuated based on certain individual characteristics (e.g. presence of conditions  
17 such as depression, sociodemographic characteristics) (43). Other limitations include the fact that  
18 we did not include other sleep problems such as insomnia or sleep apnea nor environmental factors  
19 such as noise, traffic or commuting, all of which could affect sleep duration. In addition,  
20 multimorbidity was also self-reported based on a restricted list of diseases in the questionnaire,  
21 therefore participants may have not reported additional conditions, which may produce a possible  
22 underestimation of multimorbidity prevalence. Information on non-responders was not available,  
23 and despite being a representative sample of the Luxembourg population (in terms of age, sex and  
24 district), we could not determine the possibility of a non-response bias. In our study, we only  
25 included the number of sleep hours during the night, without including nap times. For this reason,  
26 the categories used here are slightly different from the recommendations of daily sleep hours.  
27 Finally, it should be noted that the study design (cross-sectional) does not allow to ascertain a  
28 causal link between sleep and multimorbidity; in addition, the low participation rate may affect the  
29 generalizability of our results.

30  
31 This is the first study in Luxembourg on the prevalence of sleep patterns, with a focus on short and  
32 long sleep duration, and their relationship with multimorbidity. Sleep deprivation, having  
33 difficulties in sleeping the night through, sleep disorders and sleeping medication represent a  
34 neglected public health problem, especially when associated with a number of chronic conditions  
35 and diseases, thus producing a negative impact on the wellbeing and general health status of the  
36 population. Sleep hygiene should be considered as an additional important health behavior along  
37 with diet, smoking and physical activity, both in clinical and public health practice. As both sleep  
38  
39  
40  
41  
42  
43  
44  
45  
46  
47  
48  
49  
50  
51  
52  
53  
54  
55  
56  
57  
58  
59  
60

1  
2  
3 problems and multimorbidity are highly prevalent in Luxembourg, health promotion programs  
4 should be developed to improve and promote healthy sleeping habits among the general population,  
5 which in turn may be beneficial in the prevention and management of a number of chronic disease  
6 outcomes, including the occurrence of multimorbidity.  
7  
8  
9

## 10 **Acknowledgements**

11 We are grateful to the population of Luxembourg and to all the EHES-LUX team who have  
12 contributed to this study. We would like to thank Kuemmerle A, Barre J, Dincau M, Delagardelle  
13 C, Michel G, Schlessler M, Mormont D, Chioti A, Gantenbein M, Lieunard C, Columeau A, Kiemen  
14 M, Weis J, Ambrozet G, Billy A, Larcelet M, Marcic D, Gauthier C, and Viau-Courville M for their  
15 valuable contributions.  
16  
17  
18  
19  
20  
21  
22  
23  
24  
25  
26  
27  
28  
29  
30  
31  
32  
33  
34  
35  
36  
37  
38  
39  
40  
41  
42  
43  
44  
45  
46  
47  
48  
49  
50  
51  
52  
53  
54  
55  
56  
57  
58  
59  
60

## References

1. Ferrie JE, Kivimäki M, Akbaraly TN, Singh-Manoux A, Miller MA, Gimeno D, et al. Associations between change in sleep duration and inflammation: findings on C-reactive protein and interleukin 6 in the Whitehall II Study. *American journal of epidemiology*. 2013;178(6):956-61.
2. Ferrie JE, Shipley MJ, Akbaraly TN, Marmot MG, Kivimäki M, Singh-Manoux A. Change in sleep duration and cognitive function: findings from the Whitehall II Study. *Sleep*. 2011;34(5):565-73.
3. St-Onge M-P. The role of sleep duration in the regulation of energy balance: effects on energy intakes and expenditure. *Journal of clinical sleep medicine: JCSM: official publication of the American Academy of Sleep Medicine*. 2013;9(1):73.
4. Watson NF, Badr MS, Belenky G, Bliwise DL, Buxton OM, Buysse D, et al. Recommended Amount of Sleep for a Healthy Adult: A Joint Consensus Statement of the American Academy of Sleep Medicine and Sleep Research Society. *Sleep*. 2015;38(6):843-4.
5. Centers for Disease Control and Prevention CDC 24/7: Saving lives, Protecting People 1600 Clifton Road Atlanta, GA 30329-4027 USA [updated June 5, 2017. National Center for Chronic Disease Prevention and Health Promotion, Division of Population Health  
Available from: [https://www.cdc.gov/sleep/about\\_us.html](https://www.cdc.gov/sleep/about_us.html).
6. Buysse DJ. Sleep health: can we define it? Does it matter? *Sleep*. 2014;37(1):9-17.
7. Ford ES, Cunningham TJ, Croft JB. Trends in self-reported sleep duration among US adults from 1985 to 2012. *Sleep*. 2015;38(5):829-32.
8. Stranges S, Dorn JM, Shipley MJ, Kandala N-B, Trevisan M, Miller MA, et al. Correlates of short and long sleep duration: a cross-cultural comparison between the United Kingdom and the United States: the Whitehall II Study and the Western New York Health Study. *American journal of epidemiology*. 2008;168(12):1353-64.
9. Grandner MA, Williams NJ, Knutson KL, Roberts D, Jean-Louis G. Sleep disparity, race/ethnicity, and socioeconomic position. *Sleep medicine*. 2016;18:7-18.
10. Yoon H-S, Yang JJ, Song M, Lee H-W, Han S, Lee S-A, et al. Correlates of self-reported sleep duration in middle-aged and elderly Koreans: from the health examinees study. *PloS one*. 2015;10(5):e0123510.
11. Stringhini S, Haba-Rubio J, Marques-Vidal P, Waeber G, Preisig M, Guessous I, et al. Association of socioeconomic status with sleep disturbances in the Swiss population-based CoLaus study. *Sleep medicine*. 2015;16(4):469-76.
12. Gubelmann C, Heinzer R, Haba-Rubio J, Vollenweider P, Marques-Vidal P. Physical Activity is Associated with Higher Sleep Efficiency in the General Population: The CoLaus Study. *Sleep*. 2018.
13. Campanini MZ, Guallar-Castillon P, Rodriguez-Artalejo F, Lopez-Garcia E. Mediterranean Diet and Changes in Sleep Duration and Indicators of Sleep Quality in Older Adults. *Sleep*. 2017;40(3).

1  
2  
3  
4  
5  
6  
7  
8  
9  
10  
11  
12  
13  
14  
15  
16  
17  
18  
19  
20  
21  
22  
23  
24  
25  
26  
27  
28  
29  
30  
31  
32  
33  
34  
35  
36  
37  
38  
39  
40  
41  
42  
43  
44  
45  
46  
47  
48  
49  
50  
51  
52  
53  
54  
55  
56  
57  
58  
59  
60

14. Dashti HS, Scheer FA, Jacques PF, Lamon-Fava S, Ordovás JM. Short sleep duration and dietary intake: epidemiologic evidence, mechanisms, and health implications. *Advances in nutrition*. 2015;6(6):648-59.
15. Alcantara C, Biggs ML, Davidson KW, Delaney JA, Jackson CL, Zee PC, et al. Sleep Disturbances and Depression in the Multi-Ethnic Study of Atherosclerosis. *Sleep*. 2016;39(4):915-25.
16. Rangaraj VR, Knutson KL. Association between sleep deficiency and cardiometabolic disease: implications for health disparities. *Sleep medicine*. 2016;18:19-35.
17. St-Onge MP, Grandner MA, Brown D, Conroy MB, Jean-Louis G, Coons M, et al. Sleep Duration and Quality: Impact on Lifestyle Behaviors and Cardiometabolic Health: A Scientific Statement From the American Heart Association. *Circulation*. 2016;134(18):e367-e86.
18. Akerstedt T, Ghilotti F, Grotta A, Bellavia A, Lagerros YT, Belloc R. Sleep duration, mortality and the influence of age. *European journal of epidemiology*. 2017;32(10):881-91.
19. Koyanagi A, Garin N, Olaya B, Ayuso-Mateos JL, Chatterji S, Leonardi M, et al. Chronic conditions and sleep problems among adults aged 50 years or over in nine countries: a multi-country study. *PloS one*. 2014;9(12):e114742.
20. Wang S, Li B, Wu Y, Ungvari GS, Ng CH, Fu Y, et al. Relationship of Sleep Duration with Sociodemographic Characteristics, Lifestyle, Mental Health, and Chronic Diseases in a Large Chinese Adult Population. *Journal of clinical sleep medicine: JCSM: official publication of the American Academy of Sleep Medicine*. 2017;13(3):377-84.
21. van den Akker M, Buntinx F, Knottnerus JA. Comorbidity or multimorbidity: what's in a name? A review of literature. *The European Journal of General Practice*. 1996;2(2):65-70.
22. Xu X, Mishra GD, Jones M. Evidence on multimorbidity from definition to intervention: An overview of systematic reviews. *Ageing research reviews*. 2017;37:53-68.
23. Afshar S, Roderick PJ, Kowal P, Dimitrov BD, Hill AG. Multimorbidity and the inequalities of global ageing: a cross-sectional study of 28 countries using the World Health Surveys. *BMC public health*. 2015;15(1):776.
24. Barnett K, Mercer SW, Norbury M, Watt G, Wyke S, Guthrie B. Epidemiology of multimorbidity and implications for health care, research, and medical education: a cross-sectional study. *The Lancet*. 2012;380(9836):37-43.
25. Ruiz-Castell M, Kandala NB, Kuemmerle A, Schritz A, Barre J, Delagardelle C, et al. Hypertension burden in Luxembourg: Individual risk factors and geographic variations, 2013 to 2015 European Health Examination Survey. *Medicine*. 2016;95(36):e4758.
26. Whinnery J, Jackson N, Rattanaumpawan P, Grandner MA. Short and long sleep duration associated with race/ethnicity, sociodemographics, and socioeconomic position. *Sleep*. 2014;37(3):601-11.
27. Lakerveld J, Mackenbach JD, Horvath E, Rutters F, Compernelle S, Bardos H, et al. The relation between sleep duration and sedentary behaviours in European adults. *Obesity reviews : an official journal of the International Association for the Study of Obesity*. 2016;17 Suppl 1:62-7.
28. Johns MW. A new method for measuring daytime sleepiness: the Epworth sleepiness scale. *Sleep*. 1991;14(6):540-5.



- 1
- 2
- 3
- 4 29. Kleiser C, Wawro N, Stelmach-Mardas M, Boeing H, Gedrich K, Himmerich H, et al. Are sleep duration, midpoint of sleep and sleep quality associated with dietary intake among Bavarian adults? *European journal of clinical nutrition*. 2017;71(5):631-7.
- 5
- 6
- 7 30. Lima MG, Francisco PMSB, de Azevedo Barros MB. Sleep duration pattern and chronic diseases in Brazilian adults (ISACAMP, 2008/09). *Sleep medicine*. 2012;13(2):139-44.
- 8
- 9
- 10 31. Liu Y. Prevalence of healthy sleep duration among adults—United States, 2014. *MMWR Morbidity and mortality weekly report*. 2016;65.
- 11
- 12
- 13 32. Reis C, Dias S, Rodrigues AM, Sousa RD, Gregorio MJ, Branco J, et al. Sleep duration, lifestyles and chronic diseases: a cross-sectional population-based study. *Sleep science (Sao Paulo, Brazil)*. 2018;11(4):217-30.
- 14
- 15
- 16 33. Wang Y-M, Song M, Wang R, Shi L, He J, Fan T-T, et al. Insomnia and multimorbidity in the community elderly in China. *Journal of clinical sleep medicine: JCSM: official publication of the American Academy of Sleep Medicine*. 2017;13(4):591.
- 17
- 18
- 19 34. Marshall NS, Stranges S. Are sleep difficulties the “canary in the coalmine” for aortic calcification in women? *Sleep medicine*. 2013;14(5):389-90.
- 20
- 21
- 22 35. Grandner MA, Petrov ME, Rattanaumpawan P, Jackson N, Platt A, Patel NP. Sleep symptoms, race/ethnicity, and socioeconomic position. *Journal of clinical sleep medicine : JCSM : official publication of the American Academy of Sleep Medicine*. 2013;9(9):897-905; a-d.
- 23
- 24
- 25 36. Jackson CL, Hu FB, Redline S, Williams DR, Mattei J, Kawachi I. Racial/ethnic disparities in short sleep duration by occupation: the contribution of immigrant status. *Social science & medicine (1982)*. 2014;118:71-9.
- 26
- 27
- 28 37. Vincent H, Noel PAM, Philippe VK. Measuring and accounting for the deprivation gap of Portuguese immigrants in Luxembourg. LISER; 2012.
- 29
- 30
- 31 38. Polo-Kantola P, Laine A, Kronholm E, Saarinen MM, Rautava P, Aromaa M, et al. Gender differences in actual and preferred nocturnal sleep duration among Finnish employed population. *Maturitas*. 2016;94:77-83.
- 32
- 33
- 34 39. Nugent CN, Black LI. Sleep Duration, Quality of Sleep, and Use of Sleep Medication, by Sex and Family Type, 2013-2014. *NCHS data brief*. 2016(230):1-8.
- 35
- 36
- 37 40. Gangwisch JE. Epidemiological evidence for the links between sleep, circadian rhythms and metabolism. *Obesity reviews : an official journal of the International Association for the Study of Obesity*. 2009;10 Suppl 2:37-45.
- 38
- 39
- 40 41. Kredlow MA, Capozzoli MC, Hearon BA, Calkins AW, Otto MW. The effects of physical activity on sleep: a meta-analytic review. *Journal of behavioral medicine*. 2015;38(3):427-49.
- 41
- 42
- 43 42. Cespedes EM, Hu FB, Redline S, Rosner B, Alcantara C, Cai J, et al. Comparison of Self-Reported Sleep Duration With Actigraphy: Results From the Hispanic Community Health Study/Study of Latinos Sueno Ancillary Study. *American journal of epidemiology*. 2016;183(6):561-73.
- 44
- 45
- 46 43. Matthews KA, Patel SR, Pantescio EJ, Buysse DJ, Kamarck TW, Lee L, et al. Similarities and differences in estimates of sleep duration by polysomnography, actigraphy, diary, and self-reported habitual sleep in a community sample. *Sleep health*. 2018;4(1):96-103.
- 47
- 48
- 49
- 50
- 51
- 52
- 53
- 54
- 55
- 56
- 57
- 58
- 59
- 60

1  
2  
3  
4  
5  
6  
7  
8  
9  
10  
11  
12  
13  
14  
15  
16  
17  
18  
19  
20  
21  
22  
23  
24  
25  
26  
27  
28  
29  
30  
31  
32  
33  
34  
35  
36  
37  
38  
39  
40  
41  
42  
43  
44  
45  
46  
47  
48  
49  
50  
51  
52  
53  
54  
55  
56  
57  
58  
59  
60

**Table 1.** Chronic diseases/conditions, multimorbidity and sleep: European Health Examination Survey in Luxembourg (N =1508).

|                                                                        | N (%) / Mean $\pm$ SD |
|------------------------------------------------------------------------|-----------------------|
| Hypertension                                                           | 250 (16.59)           |
| High cholesterol                                                       | 458 (30.39)           |
| Diabetes                                                               | 69 (4.58)             |
| Coronary heart disease or angina pectoris                              | 26 (1.73)             |
| Myocardial infarction or chronic consequences of myocardial infarction | 14 (0.93)             |
| Stroke or chronic consequences of stroke                               | 11 (0.73)             |
| Stomach or duodenal ulcer                                              | 81 (5.37)             |
| Cirrhosis of the liver or other liver disease                          | 46 (3.05)             |
| Urinary incontinence, problems in controlling the bladder              | 74 (4.91)             |
| Kidney problems                                                        | 108 (7.17)            |
| Chronic low back disorder or other chronic back defect                 | 489 (32.47)           |
| Chronic neck disorder or other chronic neck defect                     | 246 (16.32)           |
| Rheumatoid arthritis                                                   | 88 (5.85)             |
| Arthrosis                                                              | 292 (19.38)           |
| Osteoporosis                                                           | 44 (2.92)             |
| Cancer                                                                 | 54 (3.59)             |
| Severe headache such as migraine                                       | 271 (17.98)           |
| Chronic anxiety                                                        | 98 (6.50)             |
| Depression                                                             | 204 (13.54)           |
| Number of chronic diseases                                             |                       |
| 0                                                                      | 405 (27.00)           |
| 1                                                                      | 362 (24.13)           |

|    |                                                            |               |
|----|------------------------------------------------------------|---------------|
| 1  |                                                            |               |
| 2  |                                                            |               |
| 3  | ≥2 (multimorbidity)                                        | 733 (49.00)   |
| 4  |                                                            |               |
| 5  | ≥3                                                         | 465 (31.00)   |
| 6  |                                                            |               |
| 7  |                                                            |               |
| 8  | Sleep                                                      |               |
| 9  |                                                            |               |
| 10 | Diagnosis of sleep disorder                                | 122 (8.21)    |
| 11 |                                                            |               |
| 12 | Sleepiness <sup>a</sup>                                    | 118 (7.89)    |
| 13 |                                                            |               |
| 14 | Have difficulties in sleeping the night through            | 510 (33.89)   |
| 15 |                                                            |               |
| 16 | Sleeping medication                                        | 64 (4.26)     |
| 17 |                                                            |               |
| 18 |                                                            |               |
| 19 | Sleep duration                                             |               |
| 20 |                                                            |               |
| 21 | Hours when you have to work the next day (N=1,152-working) | 6.95±0.97     |
| 22 |                                                            |               |
| 23 | <6hrs/night                                                | 70 (6.08)     |
| 24 |                                                            |               |
| 25 | 6-8hrs/night                                               | 1,040 (90.28) |
| 26 |                                                            |               |
| 27 | >8hrs/night                                                | 42 (3.65)     |
| 28 |                                                            |               |
| 29 |                                                            |               |
| 30 | Hours when you don't work the next day (N=1,501)           | 7.86±1.30     |
| 31 |                                                            |               |
| 32 | ≤6hrs/night                                                | 203 (13.52)   |
| 33 |                                                            |               |
| 34 | 7-8hrs/night                                               | 878 (58.49)   |
| 35 |                                                            |               |
| 36 | >8hrs/night                                                | 420 (27.98)   |
| 37 |                                                            |               |
| 38 |                                                            |               |
| 39 |                                                            |               |

40

41

42 N=number, SD=standard deviation

43<sup>a</sup> Measured with Epworth Sleepiness Scale

44

45

46

47

48

49

50

51

52

53

54

55

56

57

58

59

60

**Table 2.** Participant characteristics by chronic conditions/diseases: European Health Examination Survey in Luxembourg (N =1508).

|                                         | Chronic conditions/diseases |             |             |             | p <sup>a</sup> |
|-----------------------------------------|-----------------------------|-------------|-------------|-------------|----------------|
|                                         | 0                           | 1           | 2           | ≥3          |                |
| <b>Sex</b>                              |                             |             |             |             |                |
| Men                                     | 199 (27.72)                 | 199 (27.72) | 143 (19.92) | 177 (24.65) | <0.001         |
| Women                                   | 206 (26.34)                 | 163 (20.84) | 125 (15.98) | 288 (36.83) |                |
| <b>Age</b>                              |                             |             |             |             |                |
| 25-34                                   | 130 (43.62)                 | 86 (28.86)  | 48 (16.11)  | 34 (11.41)  | <0.001         |
| 35-44                                   | 156 (34.29)                 | 119 (26.15) | 69 (15.16)  | 111 (24.40) |                |
| 45-54                                   | 83 (18.16)                  | 111 (24.29) | 98 (21.44)  | 165 (36.11) |                |
| 55-64                                   | 36 (12.41)                  | 46 (15.86)  | 53 (18.28)  | 155 (53.45) |                |
| <b>Immigration</b>                      |                             |             |             |             |                |
| Luxembourg                              | 184 (23.44)                 | 197 (25.10) | 144 (18.34) | 260 (33.12) | <0.001         |
| Portugal                                | 52 (23.85)                  | 42 (19.27)  | 45 (20.64)  | 79 (36.24)  |                |
| Other                                   | 169 (34.00)                 | 123 (24.75) | 79 (15.90)  | 126 (25.35) |                |
| <b>Education</b>                        |                             |             |             |             |                |
| Primary                                 | 68 (18.38)                  | 75 (20.27)  | 64 (17.30)  | 163 (44.05) | <0.001         |
| Secondary                               | 133 (23.05)                 | 142 (24.61) | 106 (18.37) | 196 (33.97) |                |
| Tertiary                                | 203 (37.04)                 | 145 (26.46) | 97 (17.70)  | 103 (18.80) |                |
| <b>Job</b>                              |                             |             |             |             |                |
| Not working                             | 58 (16.67)                  | 56 (16.09)  | 58 (16.67)  | 176 (50.57) | <0.001         |
| managers/professionals                  | 168 (35.59)                 | 138 (29.24) | 73 (15.47)  | 93 (19.70)  |                |
| technicians/clerical/service occupation | 119 (29.38)                 | 89 (21.98)  | 76 (18.77)  | 121 (29.88) |                |

|    |                                   |              |              |              |              |        |
|----|-----------------------------------|--------------|--------------|--------------|--------------|--------|
| 1  |                                   |              |              |              |              |        |
| 2  | skilled/unskilled workers         | 60 (21.90)   | 79 (28.83)   | 61 (22.26)   | 74 (27.01)   |        |
| 3  |                                   |              |              |              |              |        |
| 4  | Smoking                           |              |              |              |              |        |
| 5  | Never                             | 239 (29.25)  | 209 (25.58)  | 145 (17.75)  | 224 (27.42)  | 0.026  |
| 6  | Current                           | 90 (26.01)   | 75 (21.68)   | 63 (18.21)   | 118 (34.10)  |        |
| 7  | Ex-smoker                         | 74 (22.09)   | 78 (23.28)   | 60 (17.91)   | 123 (36.72)  |        |
| 8  |                                   |              |              |              |              |        |
| 9  | Alcohol                           |              |              |              |              |        |
| 10 | Never                             | 30 (27.78)   | 21 (19.44)   | 20 (18.52)   | 37 (34.26)   | 0.055  |
| 11 | Drinkers                          | 365 (27.53)  | 328 (24.74)  | 234 (17.65)  | 399 (30.09)  |        |
| 12 | Ex-drinkers                       | 8 (12.50)    | 13 (20.31)   | 14 (21.88)   | 29 (45.31)   |        |
| 13 |                                   |              |              |              |              |        |
| 14 | Fruits and vegetables consumption |              |              |              |              |        |
| 15 | <1 portion/day                    | 126 (27.39)  | 112 (24.35)  | 87 (18.91)   | 135 (29.35)  | 0.597  |
| 16 | 1-4 portions/day                  | 223 (27.81)  | 183 (22.82)  | 142 (17.71)  | 254 (31.67)  |        |
| 17 | ≥5 portions/day                   | 55 (23.31)   | 66 (27.97)   | 39 (16.53)   | 76 (32.20)   |        |
| 18 |                                   |              |              |              |              |        |
| 19 | Physical Activity                 |              |              |              |              |        |
| 20 | Never                             | 130 (21.35)  | 133 (21.84)  | 125 (20.53)  | 221 (36.29)  | <0.001 |
| 21 | ≤3h/week                          | 151 (29.84)  | 130 (25.69)  | 77 (15.22)   | 148 (29.25)  |        |
| 22 | >3h/week                          | 121 (31.84)  | 98 (25.79)   | 65 (17.11)   | 96 (25.26)   |        |
| 23 |                                   |              |              |              |              |        |
| 24 | BMI                               | 25.27 ± 4.06 | 26.04 ± 4.89 | 26.66 ± 4.96 | 28.07 ± 5.56 | <0.001 |
| 25 | <25                               | 212 (33.02)  | 169 (26.32)  | 112 (17.45)  | 149 (23.21)  | <0.001 |
| 26 | 25-30                             | 152 (27.39)  | 131 (23.60)  | 100 (18.02)  | 172 (30.99)  |        |
| 27 | ≥30                               | 41 (13.62)   | 61 (20.27)   | 55 (18.27)   | 144 (47.84)  |        |

Values are: numbers (%) for categorical variables and means±standard deviation for continuous variables. BMI: Body Mass Index.<sup>a</sup>  $\chi^2$  test for categorical variables, t-test for continuous variables.

**Table 3.** Participant's characteristics by Sleep duration: European Health Examination Survey in Luxembourg (N =1508).

|                                         | Sleep hours when you have to work the next day<br>(N=1,152-working) |              |              |                | Sleep hours when you do NOT work the next day<br>(N=1,501) |               |              |                |
|-----------------------------------------|---------------------------------------------------------------------|--------------|--------------|----------------|------------------------------------------------------------|---------------|--------------|----------------|
|                                         | <6hrs/night                                                         | 6-8hrs/night | >8hrs/night  | P <sup>a</sup> | ≤6hrs/night                                                | 7-8hrs/night  | >8hrs/night  | P <sup>a</sup> |
| Sex                                     |                                                                     |              |              |                |                                                            |               |              |                |
| Men                                     | 41 (6.93)                                                           | 537 (90.71)  | 14 (2.36)    | 0.031          | 97 (13.49)                                                 | 436 (60.64)   | 186 (25.87)  | 0.193          |
| Women                                   | 29 (5.18)                                                           | 503 (89.82)  | 28 (5.00)    |                | 106 (13.55)                                                | 442 (56.52)   | 234 (29.92)  |                |
| Age                                     | 45.18 ± 8.90                                                        | 43.02 ± 9.02 | 41.40 ± 9.40 | 0.072          | 48.44 ± 9.62                                               | 45.47 ± 10.01 | 42.38 ± 9.74 | <0.001         |
| 25-34                                   | 10 (3.85)                                                           | 237 (91.15)  | 13 (5.00)    | 0.264          | 22 (7.41)                                                  | 157 (52.86)   | 118 (39.73)  | <0.001         |
| 35-44                                   | 23 (5.88)                                                           | 352 (90.03)  | 16 (4.09)    |                | 51 (11.21)                                                 | 272 (59.78)   | 132 (29.01)  |                |
| 45-54                                   | 27 (7.05)                                                           | 347 (90.60)  | 9 (2.35)     |                | 70 (15.25)                                                 | 270 (58.82)   | 119 (25.93)  |                |
| 55-64                                   | 10 (8.47)                                                           | 104 (88.14)  | 4 (3.39)     |                | 60 (20.69)                                                 | 179 (61.72)   | 51 (17.59)   |                |
| Immigration                             |                                                                     |              |              |                |                                                            |               |              |                |
| Luxembourg                              | 28 (4.59)                                                           | 558 (91.48)  | 24 (3.93)    | 0.015          | 77 (9.80)                                                  | 500 (63.61)   | 209 (26.59)  | <0.001         |
| Portugal                                | 20 (12.05)                                                          | 139 (83.73)  | 7 (4.22)     |                | 48 (22.02)                                                 | 105 (48.17)   | 65 (29.82)   |                |
| Other                                   | 22 (5.85)                                                           | 343 (91.22)  | 11 (2.93)    |                | 78 (15.69)                                                 | 273 (54.93)   | 146 (29.38)  |                |
| Education                               |                                                                     |              |              |                |                                                            |               |              |                |
| Primary                                 | 25 (10.78)                                                          | 198 (85.34)  | 9 (3.88)     | 0.002          | 89 (24.05)                                                 | 186 (50.27)   | 346 (62.91)  | <0.001         |
| Secondary                               | 28 (6.56)                                                           | 380 (88.99)  | 19 (4.45)    |                | 76 (13.19)                                                 | 343 (59.55)   | 37 (6.73)    |                |
| Tertiary                                | 17 (3.47)                                                           | 459 (93.67)  | 14 (2.86)    |                | 157 (27.26)                                                | 346 (62.91)   | 167 (30.36)  |                |
| Job                                     |                                                                     |              |              |                |                                                            |               |              |                |
| Not working                             | NA                                                                  | NA           | NA           | 0.004          | 92 (26.44)                                                 | 204 (58.62)   | 52 (14.94)   | <0.001         |
| managers/professionals                  | 16 (3.39)                                                           | 440 (93.22)  | 16 (3.39)    |                | 31 (6.55)                                                  | 292 (61.73)   | 150 (31.71)  |                |
| technicians/clerical/service occupation | 29 (7.13)                                                           | 367 (90.17)  | 11 (2.70)    |                | 43 (10.51)                                                 | 239 (58.44)   | 127 (31.05)  |                |
| skilled/unskilled workers               | 25 (9.16)                                                           | 233 (85.35)  | 15 (5.49)    |                | 37 (13.65)                                                 | 143 (52.77)   | 91 (33.58)   |                |
| Smoking                                 |                                                                     |              |              |                |                                                            |               |              |                |

|    |                                   |              |              |              |       |              |              |              |        |
|----|-----------------------------------|--------------|--------------|--------------|-------|--------------|--------------|--------------|--------|
| 1  |                                   |              |              |              |       |              |              |              |        |
| 2  | Never                             | 38 (5.74)    | 597 (90.18)  | 27 (4.08)    | 0.850 | 92 (11.27)   | 477 (58.46)  | 247 (30.27)  | 0.013  |
| 3  | Current                           | 18 (6.87)    | 237 (90.46)  | 7 (2.67)     |       | 59 (16.95)   | 193 (55.46)  | 96 (27.59)   |        |
| 4  | Ex-smoker                         | 14 (6.17)    | 205 (90.31)  | 8 (3.52)     |       | 52 (15.48)   | 207 (61.61)  | 77 (22.92)   |        |
| 5  |                                   |              |              |              |       |              |              |              |        |
| 6  | Alcohol                           |              |              |              |       |              |              |              |        |
| 7  | Never                             | 4 (5.88)     | 58 (85.29)   | 6 (8.82)     | 0.006 | 17 (15.60)   | 59 (54.13)   | 33 (30.28)   | 0.005  |
| 8  | Drinkers                          | 60 (5.71)    | 957 (91.06)  | 34 (8.24)    |       | 168 (12.64)  | 790 (59.44)  | 371 (27.92)  |        |
| 9  | Ex-drinkers                       | 6 (18.18)    | 25 (75.76)   | 2 (6.06)     |       | 18 (29.03)   | 29 (46.77)   | 15 (24.19)   |        |
| 10 |                                   |              |              |              |       |              |              |              |        |
| 11 | Fruits and vegetables consumption |              |              |              |       |              |              |              |        |
| 12 | <1 portion/day                    | 23 (6.18)    | 337 (90.59)  | 12 (3.23)    | 0.858 | 66 (14.32)   | 257 (55.75)  | 138 (29.93)  | 0.438  |
| 13 | 1-4 portions/day                  | 40 (6.50)    | 551 (89.59)  | 24 (3.90)    |       | 108 (13.45)  | 485 (60.40)  | 210 (26.15)  |        |
| 14 | ≥5 portions/day                   | 7 (4.27)     | 151 (92.07)  | 6 (3.66)     |       | 29 (12.29)   | 135 (57.20)  | 72 (30.51)   |        |
| 15 |                                   |              |              |              |       |              |              |              |        |
| 16 | Physical Activity                 |              |              |              |       |              |              |              |        |
| 17 | Never                             | 40 (8.87)    | 387 (85.81)  | 24 (5.32)    | 0.002 | 119 (19.48)  | 319 (52.21)  | 173 (28.31)  | <0.001 |
| 18 | ≤3h/week                          | 17 (4.11)    | 385 (93.00)  | 12 (2.90)    |       | 46 (9.11)    | 302 (59.80)  | 157 (31.09)  |        |
| 19 | >3h/week                          | 12 (4.23)    | 266 (93.66)  | 6 (2.11)     |       | 38 (9.97)    | 254 (66.67)  | 89 (23.36)   |        |
| 20 |                                   |              |              |              |       |              |              |              |        |
| 21 | BMI                               | 27.64 ± 4.61 | 26.33 ± 4.89 | 25.52 ± 5.01 | 0.049 | 27.56 ± 5.38 | 26.57 ± 5.06 | 26.13 ± 4.78 | 0.004  |
| 22 | <25                               | 18 (3.61)    | 457 (91.58)  | 24 (4.81)    | 0.011 | 72 (11.21)   | 382 (59.50)  | 188 (29.28)  | 0.183  |
| 23 | 25-30                             | 35 (8.03)    | 390 (89.45)  | 11 (2.52)    |       | 81 (14.65)   | 316 (57.14)  | 156 (28.21)  |        |
| 24 | ≥30                               | 17 (7.87)    | 192 (88.89)  | 7 (3.24)     |       | 49 (16.12)   | 179 (58.88)  | 76 (25.00)   |        |
| 25 |                                   |              |              |              |       |              |              |              |        |
| 26 |                                   |              |              |              |       |              |              |              |        |

Values are: numbers (%) for categorical variables and means±standard deviation for continuous variables. BMI: Body Mass Index. NA: not available.

<sup>a</sup>  $\chi^2$  test or Fisher's exact test for categorical variables, t-test for continuous variables.

**Table 4.** Results of multinomial logistic regression measuring the association between sleep duration and chronic conditions in models adjusted for participants socioeconomic characteristics and physical activity: European Health Examination Survey in Luxembourg (N =1508).

|                                         | Sleep duration work the next day (N=1,146-working) |                          |                   |                          | Sleep duration do NOT work the next day (N=1,501) |                          |                   |                          |
|-----------------------------------------|----------------------------------------------------|--------------------------|-------------------|--------------------------|---------------------------------------------------|--------------------------|-------------------|--------------------------|
|                                         | Short (<6h)                                        |                          | Long (>8h)        |                          | Short (≤6h)                                       |                          | Long (>8h)        |                          |
|                                         | OR (95% CI)                                        | AOR (95% CI)             | OR (95% CI)       | AOR (95% CI)             | OR (95% CI)                                       | AOR (95% CI)             | OR (95% CI)       | AOR (95% CI)             |
| Chronic conditions/diseases             |                                                    |                          |                   |                          |                                                   |                          |                   |                          |
| 0                                       | 1.00                                               | 1.00                     | 1.00              | 1.00                     | 1.00                                              | 1.00                     | 1.00              | 1.00                     |
| 1                                       | 1.72 (0.76, 3.87)                                  | <b>1.68 (0.72, 3.88)</b> | 1.88 (0.84, 4.21) | 1.84 (0.79, 4.26)        | 1.53 (0.88, 2.63)                                 | 1.27 (0.72, 2.23)        | 0.79 (0.58, 1.08) | 0.84 (0.61, 1.16)        |
| 2                                       | 3.22 (1.47, 7.05)                                  | <b>2.89 (1.27, 6.56)</b> | 1.99 (0.83, 4.76) | 1.87 (0.75, 4.65)        | 2.63 (1.54, 4.50)                                 | <b>1.93 (1.09, 3.40)</b> | 0.88 (0.62, 1.24) | 1.11 (0.77, 1.59)        |
| ≥3                                      | 4.06 (1.95, 8.43)                                  | <b>2.98 (1.30, 6.87)</b> | 0.86 (0.31, 2.43) | 0.94 (0.31, 2.89)        | 3.84 (2.39, 6.15)                                 | <b>1.77 (1.02, 3.07)</b> | 0.74 (0.54, 1.01) | 1.10 (0.76, 1.60)        |
| Immigration                             |                                                    |                          |                   |                          |                                                   |                          |                   |                          |
| Luxembourg                              |                                                    | 1.00                     |                   | 1.00                     |                                                   | 1.00                     |                   | 1.00                     |
| Portugal                                |                                                    | 1.64 (0.88, 3.06)        |                   | 0.70 (0.25, 1.94)        |                                                   | <b>1.89 (1.09, 3.27)</b> |                   | 1.24 (0.81, 1.89)        |
| Other                                   |                                                    | 1.90 (0.87, 4.16)        |                   | 0.68 (0.31, 1.50)        |                                                   | <b>2.50 (1.66, 3.76)</b> |                   | 1.27 (0.95, 1.68)        |
| Sex                                     |                                                    |                          |                   |                          |                                                   |                          |                   |                          |
| Men                                     |                                                    | 1.00                     |                   | 1.00                     |                                                   | 1.00                     |                   | 1.00                     |
| Women                                   |                                                    | <b>0.48 (0.26, 0.87)</b> |                   | <b>2.32 (1.12, 4.80)</b> |                                                   | <b>0.67 (0.45, 0.99)</b> |                   | <b>1.33 (1.02, 1.73)</b> |
| Age                                     |                                                    | 0.99 (0.96, 1.02)        |                   | 0.98 (0.95,1.02)         |                                                   | 1.00 (0.98, 1.02)        |                   | <b>0.97 (0.96, 0.99)</b> |
| Education                               |                                                    |                          |                   |                          |                                                   |                          |                   |                          |
| Primary                                 |                                                    | 1.00                     |                   | 1.00                     |                                                   | 1.00                     |                   | 1.00                     |
| Secondary                               |                                                    | 0.85 (0.41, 1.78)        |                   | 1.43 (0.53, 3.88)        |                                                   | <b>0.66 (0.41, 1.04)</b> |                   | 0.90 (0.61, 1.31)        |
| Tertiary                                |                                                    | 0.50 (0.18, 1.37)        |                   | 0.97 (0.26, 3.65)        |                                                   | <b>0.35 (0.18, 0.66)</b> |                   | 0.75 (0.47, 1.20)        |
| Job status                              |                                                    |                          |                   |                          |                                                   |                          |                   |                          |
| Unemployed                              |                                                    |                          |                   |                          |                                                   | 1.00                     |                   | 1.00                     |
| managers/professionals                  |                                                    | 1.00                     |                   | 1.00                     |                                                   | 0.56 (0.31, 1.02)        |                   | <b>2.08 (1.33, 3.25)</b> |
| technicians/clerical/service occupation |                                                    | 1.51 (0.70, 3.27)        |                   | 0.63 (0.24, 1.64)        |                                                   | <b>0.61 (0.37, 0.95)</b> |                   | <b>1.99 (1.32, 3.01)</b> |



|    |                                    |                          |                      |                          |                          |
|----|------------------------------------|--------------------------|----------------------|--------------------------|--------------------------|
| 1  |                                    |                          |                      |                          |                          |
| 2  | skilled/unskilled workers          | 1.14 (0.45, 2.90)        | 1.96 (0.64, 5.99)    | <b>0.49 (0.28, 0.86)</b> | <b>2.17 (1.36, 3.47)</b> |
| 3  | Physical Activity                  |                          |                      |                          |                          |
| 4  | Never                              | 1.00                     | 1.00                 | 1.00                     | 1.00                     |
| 5  | ≤3h/week                           | 0.60 (0.32, 1.15)        | 0.47 (0.22, 1.00)    | <b>0.64 (0.41, 0.99)</b> | 0.91 (0.67, 1.22)        |
| 6  | >3h/week                           | 0.64 (0.31, 1.34)        | 0.40 (0.16, 1.04)    | <b>0.60 (0.37, 0.95)</b> | <b>0.69 (0.50, 0.97)</b> |
| 7  | BMI                                |                          |                      |                          |                          |
| 8  | Normal                             | 1.00                     | 1.00                 | 1.00                     | 1.00                     |
| 9  | Overweight                         | 1.55 (0.82, 2.93)        | 0.61 (0.28, 1.32)    | 1.00 (0.66, 1.52)        | 1.06 (0.80, 1.40)        |
| 10 | Obese                              | 1.12 (0.52, 2.41)        | 0.64 (0.25, 1.66)    | 0.76 (0.46, 1.23)        | 0.84 (0.59, 1.20)        |
| 11 | Smoking                            |                          |                      |                          |                          |
| 12 | Never                              | 1.00                     | 1.00                 | 1.00                     | 1.00                     |
| 13 | Current                            | 0.94 (0.51, 1.76)        | 0.63 (0.26, 1.57)    | 1.12 (0.73, 1.71)        | 0.89 (0.65, 1.22)        |
| 14 | Ex-smokers                         | 0.81 (0.40, 1.63)        | 1.14 (0.49, 2.66)    | 0.97 (0.63, 1.50)        | 0.85 (0.61, 1.18)        |
| 15 | Alcohol                            |                          |                      |                          |                          |
| 16 | Never                              | 1.00                     | 1.00                 | 1.00                     | 1.00                     |
| 17 | Drink                              | 3.82 (0.78, 18.70)       | 1.13 (0.19, 6.70)    | 2.29 (0.89, 5.90)        | 1.21 (0.53, 2.77)        |
| 18 | Ex-drinker                         | 1.29 (0.37, 4.56)        | 0.45 (0.16, 1.24)    | 1.29 (0.64, 2.61)        | 1.10 (0.67, 1.80)        |
| 19 | Sleeping medication                | 2.61 (0.87, 7.87)        | 0.00 (0.00, >999.99) | 1.61 (0.78, 3.32)        | 1.58 (0.75, 3.32)        |
| 20 | Sleep disorder diagnosis           | 0.99 (0.40, 2.51)        | 0.83 (0.14, 4.74)    | 1.32 (0.76, 2.30)        | 1.04 (0.61, 1.78)        |
| 21 | Difficulties in sleeping the night | 1.72 (0.97, 3.04)        | 0.90 (0.42, 1.93)    | <b>2.35 (1.62, 3.42)</b> | <b>0.62 (0.46, 0.83)</b> |
| 22 | Sleepiness                         | <b>2.83 (1.39, 5.78)</b> | 0.86 (0.23, 3.20)    | <b>2.45 (1.42, 4.25)</b> | 0.71 (0.42, 1.19)        |

Note. OR: Odds ratio; AOR: Adjusted Odds ratio; 95% CI: 95% confidence interval.

**Supplementary Table S1.** Sleep problems and duration by chronic conditions/diseases: European Health Examination Survey in Luxembourg.

| Variables                                                | Total       | Chronic diseases /conditions |             |             |             | P      |
|----------------------------------------------------------|-------------|------------------------------|-------------|-------------|-------------|--------|
|                                                          |             | 0                            | 1           | 2           | ≥3          |        |
| Diagnosis of sleep disorder (N=1486)                     | 122 (8.21)  | 11 (9.02)                    | 13 (10.66)  | 22 (18.03)  | 76 (62.30)  | <0.001 |
| Sleepiness                                               | 118 (7.89)  | 25 (21.19)                   | 26 (22.03)  | 18 (15.25)  | 49 (41.53)  | 0.071  |
| Have difficulties in sleeping the night through (N=1505) | 510 (33.89) | 84 (16.63)                   | 79 (15.64)  | 93 (18.42)  | 249 (49.31) |        |
| Sleep duration                                           |             |                              |             |             |             |        |
| Num sleep hours when you have to work the next day       |             |                              |             |             |             |        |
| (N=1,152-working)                                        |             |                              |             |             |             |        |
| <6h                                                      | 70 (6.08)   | 10 (14.29)                   | 13 (18.57)  | 19 (27.14)  | 28 (40.00)  | 0.006  |
| 6-7h                                                     | 761 (66.06) | 232 (30.73)                  | 206 (27.28) | 133 (17.62) | 184 (24.37) |        |
| ≥8h                                                      | 321 (27.86) | 103 (32.09)                  | 87 (27.10)  | 56 (17.45)  | 75 (23.36)  |        |
| Num sleep hours when you do NOT work the next day        |             |                              |             |             |             |        |
| (N=1,501)                                                |             |                              |             |             |             |        |
| ≤6h                                                      | 203 (13.52) | 25 (12.38)                   | 34 (16.83)  | 43 (21.29)  | 100 (49.50) | <0.001 |
| 7-8h                                                     | 878 (58.49) | 245 (28.00)                  | 227 (25.94) | 150 (17.14) | 253 (28.91) |        |
| >8h                                                      | 420 (27.98) | 133 (31.89)                  | 100 (23.98) | 75 (17.99)  | 109 (26.14) |        |

1  
2  
3  
4 Values are: numbers (%) <sup>a</sup>  $\chi^2$  test for categorical variable  
5  
6  
7  
8  
9  
10  
11  
12  
13  
14  
15  
16  
17  
18  
19  
20  
21  
22  
23  
24  
25  
26  
27  
28  
29  
30  
31  
32  
33  
34  
35  
36  
37  
38  
39  
40  
41  
42  
43  
44  
45  
46

For peer review only

1  
2  
3  
4  
5  
6  
7  
8  
9  
10  
11  
12  
13  
14  
15  
16  
17  
18  
19  
20  
21  
22  
23  
24  
25  
26  
27  
28  
29  
30  
31  
32  
33  
34  
35  
36  
37  
38  
39  
40  
41  
42  
43  
44  
45  
46

For peer review only

**Supplementary Table S2.** Results of multinomial logistic regression measuring the association between sleep duration (Short (<6hrs/night); long (>8hrs/night) and chronic conditions in models adjusted for participants sociodemographic characteristics, behavioural risk factors and measures of sleep disorders and sleep quality: European Health Examination Survey in Luxembourg (N =1508). Sensitivity analysis.

|                                         | Sleep duration work the next day (N=1,146-working) |                   |                   |                   | Sleep duration do NOT work the next day (N=1,501) |                    |                   |                   |
|-----------------------------------------|----------------------------------------------------|-------------------|-------------------|-------------------|---------------------------------------------------|--------------------|-------------------|-------------------|
|                                         | Short (<6h)                                        |                   | Long (>8h)        |                   | Short (<6h)                                       |                    | Long (>8h)        |                   |
|                                         | OR (95% CI)                                        | AOR (95% CI)      | OR (95% CI)       | AOR (95% CI)      | OR (95% CI)                                       | AOR (95% CI)       | OR (95% CI)       | AOR (95% CI)      |
| Chronic conditions/diseases             |                                                    |                   |                   |                   |                                                   |                    |                   |                   |
| 0                                       | 1.00                                               | 1.00              | 1.00              | 1.00              | 1.00                                              | 1.00               | 1.00              | 1.00              |
| 1                                       | 1.72 (0.76, 3.87)                                  | 1.68 (0.72, 3.88) | 1.88 (0.84, 4.21) | 1.84 (0.79, 4.26) | 3.08 (0.65, 14.62)                                | 2.61 (0.53, 12.95) | 0.77 (0.57, 1.05) | 0.83 (0.60, 1.14) |
| 2                                       | 3.22 (1.47, 7.05)                                  | 2.89 (1.27, 6.56) | 1.99 (0.83, 4.76) | 1.87 (0.75, 4.65) | 6.03 (1.35, 26.97)                                | 3.59 (0.75, 17.23) | 0.83 (0.59, 1.15) | 1.04 (0.73, 1.49) |
| ≥3                                      | 4.06 (1.95, 8.43)                                  | 2.98 (1.30, 6.87) | 0.86 (0.31, 2.43) | 0.94 (0.31, 2.89) | 17.27 (4.36, 68.47)                               | 5.38 (1.20, 24.13) | 0.65 (0.48, 0.88) | 1.06 (0.74, 1.53) |
| Immigration                             |                                                    |                   |                   |                   |                                                   |                    |                   |                   |
| Luxembourg                              |                                                    | 1.00              |                   | 1.00              |                                                   | 1.00               |                   | 1.00              |
| Portugal                                |                                                    | 1.64 (0.88, 3.06) |                   | 0.70 (0.25, 1.94) |                                                   | 2.74 (1.02, 7.37)  |                   | 1.16 (0.77, 1.74) |
| Other                                   |                                                    | 1.90 (0.87, 4.16) |                   | 0.68 (0.31, 1.50) |                                                   | 2.90 (1.37, 6.15)  |                   | 1.16 (0.88, 1.53) |
| Sex                                     |                                                    |                   |                   |                   |                                                   |                    |                   |                   |
| Men                                     |                                                    | 1.00              |                   | 1.00              |                                                   | 1.00               |                   | 1.00              |
| Women                                   |                                                    | 0.48 (0.26, 0.87) |                   | 2.32 (1.12, 4.80) |                                                   | 0.44 (0.21, 0.90)  |                   | 1.38 (1.06, 1.78) |
| Age                                     |                                                    | 0.99 (0.96, 1.02) |                   | 0.98 (0.95, 1.02) |                                                   | 1.01 (0.97, 1.05)  |                   | 0.98 (0.96, 0.99) |
| Education                               |                                                    |                   |                   |                   |                                                   |                    |                   |                   |
| Primary                                 |                                                    | 1.00              |                   | 1.00              |                                                   | 1.00               |                   | 1.00              |
| Secondary                               |                                                    | 0.85 (0.41, 1.78) |                   | 1.43 (0.53, 3.88) |                                                   | 1.00 (0.45, 2.24)  |                   | 0.98 (0.68, 1.41) |
| Tertiary                                |                                                    | 0.50 (0.18, 1.37) |                   | 0.97 (0.26, 3.65) |                                                   | 0.52 (0.16, 1.66)  |                   | 0.87 (0.55, 1.37) |
| Job status                              |                                                    |                   |                   |                   |                                                   |                    |                   |                   |
| Unemployed                              |                                                    |                   |                   |                   |                                                   | 1.00               |                   | 1.00              |
| managers/professionals                  |                                                    | 1.00              |                   | 1.00              |                                                   | 0.42 (0.13, 1.35)  |                   | 2.21 (1.42, 3.44) |
| technicians/clerical/service occupation |                                                    | 1.51 (0.70, 3.27) |                   | 0.63 (0.24, 1.64) |                                                   | 0.84 (0.37, 1.88)  |                   | 2.16 (1.44, 3.24) |
| skilled/unskilled workers               |                                                    | 1.14 (0.45, 2.90) |                   | 1.96 (0.64, 5.99) |                                                   | 0.17 (0.05, 0.62)  |                   | 2.35 (1.49, 3.70) |

|    |                                    |                    |                      |                    |                   |
|----|------------------------------------|--------------------|----------------------|--------------------|-------------------|
| 1  |                                    |                    |                      |                    |                   |
| 2  | Physical Activity                  |                    |                      |                    |                   |
| 3  | Never                              | 1.00               | 1.00                 | 1.00               | 1.00              |
| 4  | ≤3h/week                           | 0.60 (0.32, 1.15)  | 0.47 (0.22, 1.00)    | 0.58 (0.25, 1.33)  | 0.96 (0.72, 1.28) |
| 5  | >3h/week                           | 0.64 (0.31, 1.34)  | 0.40 (0.16, 1.04)    | 0.79 (0.34, 1.82)  | 0.74 (0.54, 1.03) |
| 6  | BMI                                |                    |                      |                    |                   |
| 7  | Normal                             | 1.00               | 1.00                 | 1.00               | 1.00              |
| 8  | Overweight                         | 1.55 (0.82, 2.93)  | 0.61 (0.28, 1.32)    | 0.95 (0.44, 2.04)  | 1.06 (0.80, 1.39) |
| 9  | Obese                              | 1.12 (0.52, 2.41)  | 0.64 (0.25, 1.66)    | 0.66 (0.27, 1.59)  | 0.87 (0.61, 1.23) |
| 10 | Smoking                            |                    |                      |                    |                   |
| 11 | Never                              | 1.00               | 1.00                 | 1.00               | 1.00              |
| 12 | Current                            | 0.94 (0.51, 1.76)  | 0.63 (0.26, 1.57)    | 1.06 (0.49, 2.30)  | 0.89 (0.66, 1.20) |
| 13 | Ex-smokers                         | 0.81 (0.40, 1.63)  | 1.14 (0.49, 2.66)    | 0.70 (0.31, 1.61)  | 0.85 (0.62, 1.17) |
| 14 | Alcohol                            |                    |                      |                    |                   |
| 15 | Never                              | 1.00               | 1.00                 | 1.00               | 1.00              |
| 16 | Drink                              | 3.82 (0.78, 18.70) | 1.13 (0.19, 6.70)    | 1.39 (0.32, 6.08)  | 1.02 (0.46, 2.27) |
| 17 | Ex-drinker                         | 1.29 (0.37, 4.56)  | 0.45 (0.16, 1.24)    | 0.68 (0.22, 2.09)  | 1.04 (0.65, 1.69) |
| 18 | Sleeping medication                | 2.61 (0.87, 7.87)  | 0.00 (0.00, >999.99) | 1.72 (0.64, 4.65)  | 1.46 (0.72, 2.99) |
| 19 | Sleep disorder diagnosis           | 0.99 (0.40, 2.51)  | 0.83 (0.14, 4.74)    | 1.69 (0.76, 3.78)  | 0.99 (0.60, 1.67) |
| 20 | Difficulties in sleeping the night | 1.72 (0.97, 3.04)  | 0.90 (0.42, 1.93)    | 6.47 (2.83, 14.80) | 0.57 (0.43, 0.77) |
| 21 | Sleepiness                         | 2.83 (1.39, 5.78)  | 0.86 (0.23, 3.20)    | 1.32 (0.49, 3.57)  | 0.62 (0.37, 1.01) |

Note. OR: Odds ratio; AOR: Adjusted Odds ratio; 95% CI: 95% confidence interval.

STROBE Statement—Checklist of items that should be included in reports of *cross-sectional studies*

|                              | Item No | Recommendation                                                                                                                                                                                               | Page No       |
|------------------------------|---------|--------------------------------------------------------------------------------------------------------------------------------------------------------------------------------------------------------------|---------------|
| <b>Title and abstract</b>    | 1       | (a) Indicate the study's design with a commonly used term in the title or the abstract                                                                                                                       | 3             |
|                              |         | (b) Provide in the abstract an informative and balanced summary of what was done and what was found                                                                                                          | 3             |
| <b>Introduction</b>          |         |                                                                                                                                                                                                              |               |
| Background/rationale         | 2       | Explain the scientific background and rationale for the investigation being reported                                                                                                                         | 5             |
| Objectives                   | 3       | State specific objectives, including any prespecified hypotheses                                                                                                                                             | 6             |
| <b>Methods</b>               |         |                                                                                                                                                                                                              |               |
| Study design                 | 4       | Present key elements of study design early in the paper                                                                                                                                                      | 6             |
| Setting                      | 5       | Describe the setting, locations, and relevant dates, including periods of recruitment, exposure, follow-up, and data collection                                                                              | 6             |
| Participants                 | 6       | (a) Give the eligibility criteria, and the sources and methods of selection of participants                                                                                                                  | 6             |
| Variables                    | 7       | Clearly define all outcomes, exposures, predictors, potential confounders, and effect modifiers. Give diagnostic criteria, if applicable                                                                     | 6-7           |
| Data sources/<br>measurement | 8*      | For each variable of interest, give sources of data and details of methods of assessment (measurement). Describe comparability of assessment methods if there is more than one group                         | 6-7           |
| Bias                         | 9       | Describe any efforts to address potential sources of bias                                                                                                                                                    | 8, 12         |
| Study size                   | 10      | Explain how the study size was arrived at                                                                                                                                                                    | 6             |
| Quantitative variables       | 11      | Explain how quantitative variables were handled in the analyses. If applicable, describe which groupings were chosen and why                                                                                 | 6-8           |
| Statistical methods          | 12      | (a) Describe all statistical methods, including those used to control for confounding                                                                                                                        | 8             |
|                              |         | (b) Describe any methods used to examine subgroups and interactions                                                                                                                                          |               |
|                              |         | (c) Explain how missing data were addressed                                                                                                                                                                  |               |
|                              |         | (d) If applicable, describe analytical methods taking account of sampling strategy                                                                                                                           |               |
|                              |         | (e) Describe any sensitivity analyses                                                                                                                                                                        |               |
| <b>Results</b>               |         |                                                                                                                                                                                                              |               |
| Participants                 | 13*     | (a) Report numbers of individuals at each stage of study—eg numbers potentially eligible, examined for eligibility, confirmed eligible, included in the study, completing follow-up, and analysed            | 6             |
|                              |         | (b) Give reasons for non-participation at each stage                                                                                                                                                         |               |
|                              |         | (c) Consider use of a flow diagram                                                                                                                                                                           |               |
| Descriptive data             | 14*     | (a) Give characteristics of study participants (eg demographic, clinical, social) and information on exposures and potential confounders                                                                     | Table 2 and 3 |
|                              |         | (b) Indicate number of participants with missing data for each variable of interest                                                                                                                          |               |
| Outcome data                 | 15*     | Report numbers of outcome events or summary measures                                                                                                                                                         | 8             |
| Main results                 | 16      | (a) Give unadjusted estimates and, if applicable, confounder-adjusted estimates and their precision (eg, 95% confidence interval). Make clear which confounders were adjusted for and why they were included | Table 4       |

|                          |    |                                                                                                                                                                            |      |
|--------------------------|----|----------------------------------------------------------------------------------------------------------------------------------------------------------------------------|------|
|                          |    | (b) Report category boundaries when continuous variables were categorized                                                                                                  | 7-8  |
|                          |    | (c) If relevant, consider translating estimates of relative risk into absolute risk for a meaningful time period                                                           |      |
| Other analyses           | 17 | Report other analyses done—eg analyses of subgroups and interactions, and sensitivity analyses                                                                             |      |
| <b>Discussion</b>        |    |                                                                                                                                                                            |      |
| Key results              | 18 | Summarise key results with reference to study objectives                                                                                                                   | 9    |
| Limitations              | 19 | Discuss limitations of the study, taking into account sources of potential bias or imprecision. Discuss both direction and magnitude of any potential bias                 | 11   |
| Interpretation           | 20 | Give a cautious overall interpretation of results considering objectives, limitations, multiplicity of analyses, results from similar studies, and other relevant evidence | 9-11 |
| Generalisability         | 21 | Discuss the generalisability (external validity) of the study results                                                                                                      | 12   |
| <b>Other information</b> |    |                                                                                                                                                                            |      |
| Funding                  | 22 | Give the source of funding and the role of the funders for the present study and, if applicable, for the original study on which the present article is based              | 6    |

\*Give information separately for exposed and unexposed groups.

**Note:** An Explanation and Elaboration article discusses each checklist item and gives methodological background and published examples of transparent reporting. The STROBE checklist is best used in conjunction with this article (freely available on the Web sites of PLoS Medicine at <http://www.plosmedicine.org/>, Annals of Internal Medicine at <http://www.annals.org/>, and Epidemiology at <http://www.epidem.com/>). Information on the STROBE Initiative is available at [www.strobe-statement.org](http://www.strobe-statement.org).



# BMJ Open

## SLEEP DURATION AND MULTIMORBIDITY IN LUXEMBOURG. RESULTS FROM THE EUROPEAN HEALTH EXAMINATION SURVEY IN LUXEMBOURG, 2013-2015

|                                 |                                                                                                                                                                                                                                                                                                                                                                                                                                                                                                                                                                                                                                                                                                                                          |
|---------------------------------|------------------------------------------------------------------------------------------------------------------------------------------------------------------------------------------------------------------------------------------------------------------------------------------------------------------------------------------------------------------------------------------------------------------------------------------------------------------------------------------------------------------------------------------------------------------------------------------------------------------------------------------------------------------------------------------------------------------------------------------|
| Journal:                        | <i>BMJ Open</i>                                                                                                                                                                                                                                                                                                                                                                                                                                                                                                                                                                                                                                                                                                                          |
| Manuscript ID                   | bmjopen-2018-026942.R2                                                                                                                                                                                                                                                                                                                                                                                                                                                                                                                                                                                                                                                                                                                   |
| Article Type:                   | Research                                                                                                                                                                                                                                                                                                                                                                                                                                                                                                                                                                                                                                                                                                                                 |
| Date Submitted by the Author:   | 23-Jul-2019                                                                                                                                                                                                                                                                                                                                                                                                                                                                                                                                                                                                                                                                                                                              |
| Complete List of Authors:       | Ruiz-Castell, Maria; Luxembourg Institute of Health, Epidemiology and Public Health Research Unit, Department of Population Health<br>Makovski, Tatjana; Luxembourg Institute of Health, Epidemiology and Public Health Research Unit, Department of Population Health; Care and Public Health Research Institute, Maastricht University, Department of Family medicine<br>Bocquet, Valéry; Luxembourg Institute of Health, Competence Center in Methodology and Statistics, Department of Population Health<br>Stranges, Saverio; , Schulich School of Medicine & Dentistry, Western University, Department of Epidemiology & Biostatistics; Schulich School of Medicine & Dentistry, Western University, Department of Family Medicine |
| <b>Primary Subject Heading</b>: | Epidemiology                                                                                                                                                                                                                                                                                                                                                                                                                                                                                                                                                                                                                                                                                                                             |
| Secondary Subject Heading:      | Public health, Epidemiology                                                                                                                                                                                                                                                                                                                                                                                                                                                                                                                                                                                                                                                                                                              |
| Keywords:                       | EPIDEMIOLOGY, PUBLIC HEALTH, SLEEP MEDICINE                                                                                                                                                                                                                                                                                                                                                                                                                                                                                                                                                                                                                                                                                              |
|                                 |                                                                                                                                                                                                                                                                                                                                                                                                                                                                                                                                                                                                                                                                                                                                          |

SCHOLARONE™  
Manuscripts

1  
2  
3 **SLEEP DURATION AND MULTIMORBIDITY IN LUXEMBOURG. RESULTS FROM**  
4 **THE EUROPEAN HEALTH EXAMINATION SURVEY IN LUXEMBOURG, 2013-2015**

5 Maria Ruiz-Castell, PhD<sup>1</sup>, Tatjana T. Makovski, MD<sup>1,2,3</sup>, Valéry Bocquet, PhD<sup>4</sup>, Saverio Stranges,  
6 MD, PhD<sup>1,5,6</sup>  
7  
8  
9

10 <sup>1</sup> Epidemiology and Public Health Research Unit, Department of Population Health, Luxembourg  
11 Institute of Health (LIH), Strassen, Luxembourg  
12  
13

14 <sup>2</sup> Department of Family medicine, Care and Public Health Research Institute, Maastricht University,  
15 Maastricht, the Netherlands  
16  
17

18 <sup>3</sup> Chairgroup of Complex Genetics and Epidemiology, Care and Public Health Research Institute,  
19 Maastricht University, Maastricht, the Netherlands  
20  
21

22 <sup>4</sup> Competence Center in Methodology and Statistics, Department of Population Health,  
23 Luxembourg Institute of Health (LIH), Strassen, Luxembourg  
24  
25

26 <sup>5</sup> Department of Epidemiology & Biostatistics, Schulich School of Medicine & Dentistry, Western  
27 University, London, Ontario, Canada  
28  
29

30 <sup>6</sup> Department of Family Medicine, Schulich School of Medicine & Dentistry, Western University,  
31 London, Ontario, Canada  
32  
33

34  
35  
36 **Corresponding author:** Maria Ruiz-Castell; Luxembourg Institute of Health, Department of  
37 Population Health. 1A-B, rue Thomas Edison, L-1445 Strassen. Luxembourg; [Maria.Ruiz@lih.lu](mailto:Maria.Ruiz@lih.lu);  
38 Telephone number: +352 26970-746  
39  
40

41 Fax: +352 26970-719  
42  
43  
44  
45  
46

47 **Word count:** 3170; **Abstract:** 162; **Tables:** 4; **References:** 44  
48

49 **Funding:** The study was funded by the Directorate and Ministry of Health and the Luxembourg  
50 Institute of Health.  
51  
52  
53

54 **Conflict of interest:** The authors declare that they have no conflict of interest.  
55  
56  
57  
58  
59  
60

## Contributorship statement

MRC and SS conceptualized and designed the study. MRC and VB performed the statistical analysis. MRC, SS and T.T.M interpreted the data. MRC drafted the article. SS supervised the study. All authors participated in the revision of the article. All authors contributed to and have approved the final manuscript.

For peer review only

## Abstract

**Objectives:** We estimated the prevalence of short sleep duration and multimorbidity in Luxembourg, and assessed whether sleep duration was associated with multimorbidity after adjusting for socio-demographic and behavioral characteristics.

**Design:** Cross-sectional study.

**Participants:** Data from 1508 Luxembourg residents (48% men and 52% women) aged 25 to 64 years came from the European Health Examination Survey 2013-2015.

**Outcome measures:** Short sleep duration and multimorbidity.

**Results:** Participants reported sleeping 6.95hrs/night during work days, nearly 1hr less than during non-work days (7.86hrs/night). Nearly half of participants reported having been diagnosed with  $\geq 2$  chronic conditions/diseases. Short sleep duration was associated with the number of chronic conditions (OR: 4.65, 95% CI: 1.48, 14.51, OR: 7.30, 95% CI: 2.35, 22.58, OR: 6.79, 95% CI: 2.15, 21.41 for 1, 2, and  $\geq 3$  chronic conditions/diseases, respectively), independently of socioeconomic and behavioral characteristics.

**Conclusions:** Health promotion programs should aim at improving and promoting healthy lifestyles among the general population to improve sleep habits as well as decrease multimorbidity in middle-aged adults.

**Keywords:** Sleep duration; multimorbidity; chronic diseases; Luxembourg; European Health Examination Survey

1  
2  
3 ***Strengths and limitations of this study***  
4  
5

- 6
- 7 • This is the first study in Luxembourg on the prevalence of sleep patterns, with a focus on  
8 short and long sleep duration, and their relationship with multimorbidity.
  - 9 • The present study was drawn from the European Health Examination Survey in  
10 Luxembourg (EHES-LUX), a representative cross-sectional population-based survey.
  - 11 • Limitations of the present study include the subjective self-reported measure of sleep  
12 duration, the cross-sectional design of the study (not allowing to establish a causal link),  
13 and the low participation rate.  
14  
15  
16  
17  
18  
19  
20  
21

22 ***Data sharing statement:*** Extra data can be accessed by emailing Dr Laetitia Huiart, Head of the  
23 Population Health Department, LIH (laetitia.huiart@lih.lu) and the Principal Investigator of EHES-  
24 LUX2013-2015, Dr Maria Ruiz-Castell (maria.ruiz@lih.lu) and fill out a request form.  
25  
26  
27  
28  
29  
30  
31  
32  
33  
34  
35  
36  
37  
38  
39  
40  
41  
42  
43  
44  
45  
46  
47  
48  
49  
50  
51  
52  
53  
54  
55  
56  
57  
58  
59  
60

## Introduction

A healthy lifestyle includes healthy sleep habits. Sleep patterns influence several physiological and psychological processes such as inflammation, immune responses, mental and cognitive function, glucose regulation and energy balance (1-3). Short sleep duration, poor sleep quality, and sleep-related disorders can result in sleep deficiency and impact on individual health (4). According to the Centers for Disease Control and Prevention (CDC), insufficient sleep is associated with health problems such as chronic diseases, poor quality of life, mental health, risk of accidents, and lower productivity at work(5)[5] (5). Adequate sleep duration is one of the dimensions needed for good sleep health (6). The American Academy of Sleep Medicine and Sleep Research Society considers that for an adult an average sleep duration of at least 7 hours per night should be recommended (4). However, a high percentage of the population sleeps less than the recommended 7 hours (7). Several factors may affect sleep such as physical activity patterns or eating behaviors, but also socioeconomic factors including job status, marital status and ethnicity (8, 9). Studies have observed an association of lower education and unemployment with both short and long sleep duration (10, 11), while factors such as physical activity and healthy diet seem to improve sleep quality (12, 13). Moreover, diet intake (energy and total fat intake) and nutrients seem to be associated with both short and long sleep duration through multifactorial factors including eating patterns (e.g., time and hours of intake) and variations in hormones related to appetite, such as leptin (14).

Epidemiologic data suggest an association of abnormal sleep duration and poor sleep quality with cardiometabolic problems (e.g. hypertension, diabetes, obesity, cardiovascular diseases), mental disorders (e.g. depression), and mortality (15-18). The observed relationship between short sleep duration and mortality would be especially critical in adults under 65 years of age (18). Few studies so far have focused on possible relationships between sleep patterns and multimorbidity (19, 20). Multimorbidity is defined as the presence of two or more chronic diseases in the same individual (21), and is associated with disability, functional decline, frailty, poor quality of life and mortality (22). In the context of ageing societies, multimorbidity is an increasing global phenomenon (23); its occurrence usually increases with age, though a large proportion of individuals younger than 65 are also affected (24). Definitions of multimorbidity vary, however, and the prevalence differs based on changing definitions, which in turn present significant challenges when attempting to compare results between populations and studies (22).

1  
2  
3 The aim of the present study was to estimate the prevalence of short sleep duration and  
4 multimorbidity in Luxembourg, as well as to assess whether sleep duration was associated with  
5 multimorbidity after adjusting for socio-demographic and behavioral characteristics.  
6  
7

## 8 9 **Methods**

### 10 11 *Study population and recruitment*

12  
13 Data were drawn from the European Health Examination Survey in Luxembourg (EHES-LUX).  
14 EHES-LUX is a representative cross-sectional population-based survey carried out by the  
15 Luxembourg Institute of Health with the objectives of assessing the health status of the population  
16 of the Grand-Duchy of Luxembourg, develop national and European health indicators, identify the  
17 needs of the population, and evaluate health behaviors. EHES-LUX was conducted between  
18 February 2013 and January 2015. Individuals were randomly selected in a one-stage sampling  
19 procedure from the national health insurance registry (95% social coverage). Institutionalized  
20 individuals (e.g. hospitals, elderly homes) were not included. A total of 1508 residents (excluding  
21 21 pregnant women) of Luxembourg aged 25 to 64 participated in the survey (participation rate of  
22 24.1%) (25). Of them, 7 participants did not reported their sleep habits. A total of 1501 participants  
23 had information on multimorbidity and sleep habits. Participants signed an informed consent and  
24 were interviewed by trained nurses who also conducted medical examinations. Questionnaires  
25 included several health modules (e.g. sleep and nutritional habits, health care, working and living  
26 conditions) as well as demographic and socioeconomic characteristics. Medical examinations  
27 included measurements such as blood pressure and anthropometry. Sampling weights were  
28 calculated to be generalized to the population of Luxembourg in terms of age, sex and district of  
29 residence. The study national research ethics committee (Comité national d'éthique de Recherche-  
30 CNER) approved the study and it was notified to the Luxemburgish National Commission for Data  
31 Protection.  
32  
33

### 34 35 *Patient involvement*

36  
37 Participants were not involved in the development of the research question, study design,  
38 recruitment or the conduction of the study. Upon request, results from the medical examination  
39 were forwarded to the study participants and their medical doctors. General results were presented  
40 to the general public in a range of dissemination activities.  
41  
42

### 43 44 *Sleep*

45  
46 Sleep duration was assessed using two questions: 1) "How many hours do you normally sleep at  
47 night when you have to work the next day?", and 2) "How many hours do you normally sleep at  
48  
49  
50  
51  
52  
53  
54  
55  
56  
57  
58  
59  
60

1  
2  
3 night when you don't have to work the next day?". We calculated a weighted average of sleep  
4 duration for each participant by assigning weights of 5/7 to working days and 2/7 to non-working  
5 days (26, 27). Responses were categorized as short sleep duration (<6hrs/night), medium sleep  
6 duration (6-9hrs/night), and long sleep duration (>9hrs/night), in line with previously published  
7 studies and sleep time duration recommendations (4, 8, 28).  
8  
9

10  
11  
12 Sleep disorders and sleep quality were assessed with the following variables: difficulty in sleeping  
13 the night, diagnosis of sleep disorders, sleep medication and sleepiness. Difficulty in sleeping the  
14 night was assessed based on the question "Do you have difficulties in sleeping through the night?".  
15 Diagnosis of sleep disorders was assessed using the question "Have you ever been told by a doctor  
16 or another health professional that you have a sleep disorder?". Sleep medications were assessed  
17 using the question "In the past 2 weeks, have you used other types of medicines that were  
18 prescribed to you?". The question was aimed at answering about several medications including  
19 sleep tablets. Sleepiness was defined as a score of  $\geq 11$  on the Epworth Sleepiness Scale (29).  
20  
21  
22  
23  
24  
25

### 26 *Multimorbidity*

27  
28 Participants were asked if they ever had a chronic disease or condition diagnosed by a medical  
29 doctor (e.g., hypertension, high cholesterol, diabetes, cardiovascular diseases, stomach or duodenal  
30 ulcer, cirrhosis or other liver disease, urinary incontinence, kidney problems, chronic back or neck  
31 disorder, rheumatoid arthritis, arthrosis, osteoporosis, cancer, severe headache as migraine or  
32 chronic anxiety). Cardiovascular diseases included coronary heart disease or angina pectoris, heart  
33 attack or its chronic consequences, stroke or its chronic consequences. Based on this information,  
34 the variable "ever being diagnosed with a chronic disease or condition" was generated with four  
35 categories: 0, 1, 2 and  $\geq 3$  chronic disease or condition. Multimorbidity was defined as having two  
36 or more chronic diseases or conditions diagnosed by a medical doctor.  
37  
38  
39  
40  
41  
42  
43

### 44 *Explanatory variables*

45  
46 Sociodemographic characteristics included age, sex and immigration status. As Portuguese are the  
47 largest immigrant community in Luxembourg, immigration status was categorized in non-  
48 immigrant, immigrant born in Portugal, and immigrant born in other countries. Socioeconomic  
49 status included education (primary, secondary and tertiary education completed) and job status  
50 (unemployed; managers/professionals; technical/clerical/service occupation; skilled/unskilled  
51 workers).  
52  
53  
54  
55

56 Lifestyles included smoking (never; current; ex-smokers), alcohol consumption (never; ex-drinkers;  
57 drinkers), physical activity (never;  $\leq 3$ hrs/week of sports, fitness, and/or recreational activities  
58 which lasted at least 10 consecutive minutes;  $>3$ hrs/week of sports, fitness, and/or recreational  
59  
60



activities which lasted at least 10 consecutive minutes), and vegetable and fruit consumption (< 1 portion/ day, 1–4 portions/day,  $\geq 5$  portions/day). Weight and height were measured by trained nurses and used to calculate body mass index (BMI; kg/m<sup>2</sup>). BMI was categorized as normal body weight (<25 kg/m<sup>2</sup>), overweight (25-29.99 kg/m<sup>2</sup>) and obesity ( $\geq 30$ kg/m<sup>2</sup>).

### *Statistical data analysis*

Means and frequencies were used for descriptive purposes. We calculated the prevalence of sleep disorders, short and long sleep duration, chronic conditions/diseases and multimorbidity.

Percentages did not include missing values. A chi-square test ( $\chi^2$ ) or a two-way analysis of variance (ANOVA) were used to analyze associations between the prevalence of sleep duration and covariates and the prevalence of multimorbidity and covariates. The association between sleep duration and chronic conditions/diseases was assessed using multinomial logistic regression models (reference for sleep duration was 6-9hrs per night) adjusted for sociodemographic characteristics, behavioural risk factors (e.g. BMI, smoking, alcohol consumption and physical activity), as well as for measures of sleep disorders and sleep quality. We considered a  $P < 0.05$  statistically significant. To be representative of the population and avoid biased estimates, the observations were weighted. Participants with missing values on sleep habits and or multimorbidity were not included in the present analysis. Analyses were performed using STATA 14.0 and SAS version 9.4 (SAS Institute Inc., Cary, NC, USA).

## **Results**

**Table 1** shows the prevalence of chronic conditions/diseases, multimorbidity, sleep duration and sleep disorders. Nearly half of participants reported being diagnosed with two or more chronic conditions/ diseases, and nearly a third of participants reported being diagnosed with three or more chronic conditions/diseases. The most prevalent diseases were chronic low back disorder or other chronic back defect followed by hypercholesterolemia, arthrosis and hypertension. More than 8% of participants were diagnosed with a sleep disorder, a third reported having difficulties in sleeping through the night and 4.3% reported taking sleep medication. Participants reported sleeping 7.86hrs/night when they did not have to work the next day, nearly one hour more than when they had to work the next day (6.95hrs/night). Moreover, 5.13% of the Luxembourg population reported sleeping less than 6 hours/night and 1.79% reported sleeping more than 9hours/night. .

Participant characteristics by chronic conditions/diseases are shown in **Table 2**. More men than women presented three or more chronic diseases. Higher number of chronic diseases/conditions increased with age: those aged 55 to 64 presented more chronic conditions compared to those aged 25-34. Immigrants born in Portugal presented more chronic conditions than non-immigrants and

1  
2  
3 other immigrants. Participants being less educated and unemployed presented more chronic  
4 conditions compared to those employed and highly educated. Participants being less physically  
5 active and with obesity presented more chronic conditions/diseases than those being more  
6 physically active and with a lower BMI.  
7  
8  
9

10 Participant characteristics by sleep duration are shown in **Table 3**. More men than women reported  
11 a medium sleep duration. Short sleep duration was more likely among immigrants born in Portugal,  
12 participants with lower education and skilled/unskilled workers. Short sleep duration was less  
13 common among those being physically active and with a BMI less than 25 Kg/m<sup>2</sup>.  
14  
15  
16

17 **Table 4** shows results from multinomial logistic regression analyses examining the association  
18 between sleep duration and chronic conditions/diseases, and adjusted by sociodemographic  
19 characteristics, behavioural risk factors, socioeconomic position, as well as for measures of sleep  
20 disorders and sleep quality. Participants sleeping less hours (<6h) were 7.30 and 6.79 times as likely  
21 to report having 2 and 3 or more chronic conditions after adjusting for covariates. In fully adjusted  
22 models, the strength of associations between sleep duration and multimorbidity remained  
23 statistically significant.  
24  
25  
26  
27  
28

29 Estimates of sleep problems and chronic conditions are presented in **Table S1**. The prevalence of  
30 sleep problems was high, with one out of three participants having difficulties in sleeping the night  
31 through and nearly 8% of participants diagnosed with a sleep disorder. In all cases, the percentage  
32 of participants with sleep problems increased with the number of chronic diseases.  
33  
34  
35

## 36 **Discussion**

37  
38 Results from the present nationwide population-based study show for the first time in Luxembourg  
39 the prevalence of sleep patterns, with a focus on short and long sleep duration, as well as their  
40 association with multimorbidity. The prevalence of short sleep duration in Luxembourg is 5.13%  
41 .Results are similar to those observed internationally (28, 30), although in countries such as Brazil  
42 the prevalence of short sleep duration was nearly 22% (31), and in Portugal values of short sleep  
43 duration defined as ≤5hrs reached up to 20% in 2015-2016 (32). However, in the present study the  
44 age range from 25 to 64 years must be considered since it does not include adults over 65 years old  
45 who generally sleep less hours. This means that the overall prevalence of the Luxembourg  
46 population sleeping less than the recommended hours is likely to be higher, when including older  
47 adults as well.  
48  
49  
50  
51  
52  
53  
54

55 Multimorbidity is highly prevalent in Luxembourg, especially when taking into account the fact that  
56 the study population was up to 65 years, which represents a relatively young population, as  
57  
58  
59  
60

1  
2  
3 multimorbidity prevalence naturally increases with age (22). Nearly half of participants had two or  
4 more chronic diseases and 31% had three or more chronic diseases/conditions.  
5  
6 In our study, we observed that short sleep duration was significantly associated with the number of  
7 chronic conditions independently of socioeconomic, behavioral characteristics and sleep disorders.  
8  
9 Our results are in line with those from other studies that observed an association between sleep and  
10 number of chronic diseases, although previous studies have been usually performed in populations  
11 of older adults (e.g. over 50 years old) (19, 33). As observed by Koyanagi et al., sleep problems  
12 increase with the number of diseases in both low and high income countries independent of their  
13 economic development (19). These associations could explain the observed relationship between  
14 sleep duration (under the recommended 7 hours) and poor sleep quality with mortality, even among  
15 adults younger than 65 years old (18). It is not clear if sleep problems are a consequence of chronic  
16 diseases (e.g. conditions affecting sleep) or part of the cause (sleep predispose the individual to  
17 more diseases or exacerbates the symptoms), although it is plausible that both sleep problems and  
18 chronic diseases are linked by a bidirectional association (34). In terms of potential mechanisms to  
19 corroborate the biological plausibility of the link between short sleep duration and multimorbidity,  
20 reduced sleep duration has been associated with a number of chronic conditions, including cardio-  
21 metabolic and neurodegenerative disease, cancer, musculoskeletal disorders, and mental problems  
22 (15, 16). Pain caused by certain chronic diseases, as well as the medications/treatments used and  
23 mood disorders (e.g. anxiety, depression) could have an impact on sleep (35). In turn, sleep  
24 disturbances could worsen the health status. Experimental evidence corroborates the plausibility of  
25 deleterious effects of lack of sleep on endocrine, immune, neurovegetative and inflammatory  
26 pathways (1-3). Sustained short sleep duration could be related to chronic conditions through its  
27 impact on the circadian rhythm and its association with hormonal (e.g. insulin resistance and  
28 decrease leptin) and autonomic nervous system changes (increase the activity of the sympathetic  
29 nervous system) (36). Although both reduced sleep duration and the number of chronic diseases  
30 increase with age, and are more prevalent in older adults, our study shows that the prevalence is  
31 also high in adults under 65 and the association begins much earlier. It is therefore necessary to  
32 detect these problems earlier in order to improve individual health and general wellbeing and  
33 reduce mortality, particularly in the context of ageing populations burdened by the accumulation of  
34 multiple chronic conditions over time. In our study, we also observed that short sleep duration was  
35 associated with immigration status. The relationship between immigration status and sleep patterns  
36 remains unclear, possibly related to stress linked to the migratory process, cultural adaptation, or  
37 working conditions in the host country (37, 38). In our study, Portuguese immigrants were more  
38  
39  
40  
41  
42  
43  
44  
45  
46  
47  
48  
49  
50  
51  
52  
53  
54  
55  
56  
57  
58  
59  
60

1  
2  
3 likely to sleep less than 6h per night during workdays and less than 7h during non-working days.  
4 Portuguese are the largest immigrant community in Luxembourg, accounting for 16% of the 46%  
5 immigrant population living in Luxembourg. Compared to Luxembourgish natives, Portuguese  
6 immigrants have a lower socioeconomic status (39) (including income, education and employment)  
7 which could partly explain why they have a greater likelihood of being short sleepers. However,  
8 after calculating the weight average for sleep hours and adjusting for sleep disorders, the association  
9 with short sleep duration disappeared.

10  
11 In our study, long sleep duration was more common in women. This was in line with other studies  
12 showing that men usually sleep less hours, although women reported having more sleep problems  
13 (40). However, this relationship is complex and could depend on family composition (e.g. single  
14 parents have shorter sleep duration, particularly women) (41).

15  
16 In addition, short sleep duration often cluster with other behavioral risk factors such as cigarette  
17 smoking, heavy drinking, and physical inactivity, which may in turn increase the risk of chronic  
18 disease. However, in our study, we only observed an association between physical activity and short  
19 sleep duration, with no association observed between short sleep duration and smoking or alcohol  
20 consumption. Regular physical activity would reduce the likelihood of short and/or long sleep  
21 duration and maintain an optimal duration. Studies have observed an association between physical  
22 activity and sleep, improving quality of sleep, sleep efficiency, and total sleep time (12, 42).

23  
24 Limitations of the present study include the subjective measure of sleep duration (self-reported  
25 number of hours of sleep) instead of an objective measure (e.g. actigraphy, polysomnography).  
26 However, in the absence of an objective measure, there is a moderate correlation between objective  
27 and subjective measurements, a correlation that is high during weekdays possibly due to routines  
28 (43), but may be attenuated based on certain individual characteristics (e.g. presence of conditions  
29 such as depression, sociodemographic characteristics) (44). Other limitations include the fact that  
30 we did not include other sleep problems such as insomnia or sleep apnea nor environmental factors  
31 such as noise, traffic or commuting, all of which could affect sleep duration. In addition,  
32 multimorbidity was also self-reported based on a restricted list of diseases in the questionnaire,  
33 therefore participants may have not reported additional conditions, which may produce a possible  
34 underestimation of multimorbidity prevalence. Information on non-responders was not available,  
35 and despite being a representative sample of the Luxembourg population (in terms of age, sex and  
36 district), we could not determine the possibility of a non-response bias. In our study, we only  
37 included the number of sleep hours during the night, without including nap times. Moreover, we did  
38 not have information on the number of days that participants were working and assumed that most  
39  
40  
41  
42  
43  
44  
45  
46  
47  
48  
49  
50  
51  
52  
53  
54  
55  
56  
57  
58  
59  
60

1  
2  
3 were working 5 days per week. Finally, it should be noted that the study design (cross-sectional)  
4 does not allow to ascertain a causal link between sleep and multimorbidity; in addition, the low  
5 participation rate may affect the generalizability of our results.  
6  
7

8  
9 This is the first study in Luxembourg on the prevalence of sleep patterns, with a focus on short and  
10 long sleep duration, and their relationship with multimorbidity. Short sleep duration, having  
11 difficulties in sleeping the night through, sleep disorders and sleeping medication represent a  
12 neglected public health problem, especially when associated with a number of chronic conditions  
13 and diseases, thus producing a negative impact on the wellbeing and general health status of the  
14 population. Sleep hygiene should be considered as an additional important health behavior along  
15 with diet, smoking and physical activity, both in clinical and public health practice. As both sleep  
16 problems and multimorbidity are highly prevalent in Luxembourg, health promotion programs  
17 should be developed to improve and promote healthy lifestyles among the general population to  
18 improve sleep habits as well as decrease multimorbidity.  
19  
20  
21  
22  
23  
24  
25

## 26 **Acknowledgements**

27  
28 We are grateful to the population of Luxembourg and to all the EHES-LUX team who have  
29 contributed to this study. We would like to thank Kuemmerle A, Barre J, Dincau M, Delagardelle  
30 C, Michel G, Schlessier M, Mormont D, Chioti A, Gantenbein M, Lieunard C, Columeau A, Kiemen  
31 M, Weis J, Ambrozet G, Billy A, Larcelet M, Marcic D, Gauthier C, and Viau-Courville M for their  
32 valuable contributions.  
33  
34  
35  
36  
37  
38  
39  
40  
41  
42  
43  
44  
45  
46  
47  
48  
49  
50  
51  
52  
53  
54  
55  
56  
57  
58  
59  
60

## References

1. Ferrie JE, Kivimäki M, Akbaraly TN, Singh-Manoux A, Miller MA, Gimeno D, et al. Associations between change in sleep duration and inflammation: findings on C-reactive protein and interleukin 6 in the Whitehall II Study. *American journal of epidemiology*. 2013;178(6):956-61.
2. Ferrie JE, Shipley MJ, Akbaraly TN, Marmot MG, Kivimäki M, Singh-Manoux A. Change in sleep duration and cognitive function: findings from the Whitehall II Study. *Sleep*. 2011;34(5):565-73.
3. St-Onge M-P. The role of sleep duration in the regulation of energy balance: effects on energy intakes and expenditure. *Journal of clinical sleep medicine: JCSM: official publication of the American Academy of Sleep Medicine*. 2013;9(1):73.
4. Watson NF, Badr MS, Belenky G, Bliwise DL, Buxton OM, Buysse D, et al. Recommended Amount of Sleep for a Healthy Adult: A Joint Consensus Statement of the American Academy of Sleep Medicine and Sleep Research Society. *Sleep*. 2015;38(6):843-4.
5. Centers for Disease Control and Prevention CDC 24/7: Saving lives, Protecting People 1600 Clifton Road Atlanta, GA 30329-4027 USA [updated June 5, 2017. National Center for Chronic Disease Prevention and Health Promotion, Division of Population Health  
Available from: [https://www.cdc.gov/sleep/about\\_us.html](https://www.cdc.gov/sleep/about_us.html).
6. Buysse DJ. Sleep health: can we define it? Does it matter? *Sleep*. 2014;37(1):9-17.
7. Ford ES, Cunningham TJ, Croft JB. Trends in self-reported sleep duration among US adults from 1985 to 2012. *Sleep*. 2015;38(5):829-32.
8. Stranges S, Dorn JM, Shipley MJ, Kandala N-B, Trevisan M, Miller MA, et al. Correlates of short and long sleep duration: a cross-cultural comparison between the United Kingdom and the United States: the Whitehall II Study and the Western New York Health Study. *American journal of epidemiology*. 2008;168(12):1353-64.
9. Grandner MA, Williams NJ, Knutson KL, Roberts D, Jean-Louis G. Sleep disparity, race/ethnicity, and socioeconomic position. *Sleep medicine*. 2016;18:7-18.
10. Yoon H-S, Yang JJ, Song M, Lee H-W, Han S, Lee S-A, et al. Correlates of self-reported sleep duration in middle-aged and elderly Koreans: from the health examinees study. *PloS one*. 2015;10(5):e0123510.
11. Stringhini S, Haba-Rubio J, Marques-Vidal P, Waeber G, Preisig M, Guessous I, et al. Association of socioeconomic status with sleep disturbances in the Swiss population-based CoLaus study. *Sleep medicine*. 2015;16(4):469-76.
12. Gubelmann C, Heinzer R, Haba-Rubio J, Vollenweider P, Marques-Vidal P. Physical Activity is Associated with Higher Sleep Efficiency in the General Population: The CoLaus Study. *Sleep*. 2018.
13. Campanini MZ, Guallar-Castillon P, Rodriguez-Artalejo F, Lopez-Garcia E. Mediterranean Diet and Changes in Sleep Duration and Indicators of Sleep Quality in Older Adults. *Sleep*. 2017;40(3).
14. Dashti HS, Scheer FA, Jacques PF, Lamon-Fava S, Ordovás JM. Short sleep duration and dietary intake: epidemiologic evidence, mechanisms, and health implications. *Advances in nutrition*. 2015;6(6):648-59.

15. Alcantara C, Biggs ML, Davidson KW, Delaney JA, Jackson CL, Zee PC, et al. Sleep Disturbances and Depression in the Multi-Ethnic Study of Atherosclerosis. *Sleep*. 2016;39(4):915-25.
16. Rangaraj VR, Knutson KL. Association between sleep deficiency and cardiometabolic disease: implications for health disparities. *Sleep medicine*. 2016;18:19-35.
17. St-Onge MP, Grandner MA, Brown D, Conroy MB, Jean-Louis G, Coons M, et al. Sleep Duration and Quality: Impact on Lifestyle Behaviors and Cardiometabolic Health: A Scientific Statement From the American Heart Association. *Circulation*. 2016;134(18):e367-e86.
18. Akerstedt T, Ghilotti F, Grotta A, Bellavia A, Lagerros YT, Belloc R. Sleep duration, mortality and the influence of age. *European journal of epidemiology*. 2017;32(10):881-91.
19. Koyanagi A, Garin N, Olaya B, Ayuso-Mateos JL, Chatterji S, Leonardi M, et al. Chronic conditions and sleep problems among adults aged 50 years or over in nine countries: a multi-country study. *PloS one*. 2014;9(12):e114742.
20. Wang S, Li B, Wu Y, Ungvari GS, Ng CH, Fu Y, et al. Relationship of Sleep Duration with Sociodemographic Characteristics, Lifestyle, Mental Health, and Chronic Diseases in a Large Chinese Adult Population. *Journal of clinical sleep medicine: JCSM: official publication of the American Academy of Sleep Medicine*. 2017;13(3):377-84.
21. van den Akker M, Buntinx F, Knottnerus JA. Comorbidity or multimorbidity: what's in a name? A review of literature. *The European Journal of General Practice*. 1996;2(2):65-70.
22. Xu X, Mishra GD, Jones M. Evidence on multimorbidity from definition to intervention: An overview of systematic reviews. *Ageing research reviews*. 2017;37:53-68.
23. Afshar S, Roderick PJ, Kowal P, Dimitrov BD, Hill AG. Multimorbidity and the inequalities of global ageing: a cross-sectional study of 28 countries using the World Health Surveys. *BMC public health*. 2015;15(1):776.
24. Barnett K, Mercer SW, Norbury M, Watt G, Wyke S, Guthrie B. Epidemiology of multimorbidity and implications for health care, research, and medical education: a cross-sectional study. *The Lancet*. 2012;380(9836):37-43.
25. Ruiz-Castell M, Kandala NB, Kuemmerle A, Schritz A, Barre J, Delagardelle C, et al. Hypertension burden in Luxembourg: Individual risk factors and geographic variations, 2013 to 2015 European Health Examination Survey. *Medicine*. 2016;95(36):e4758.
26. Bakour C, Schwartz S, O'Rourke K, Wang W, Sappenfield W, Couluris M, et al. Sleep Duration Trajectories and Systemic Inflammation in Young Adults: Results From the National Longitudinal Study of Adolescent to Adult Health (Add Health). *Sleep*. 2017;40(11).
27. Watanabe M, Kikuchi H, Tanaka K, Takahashi M. Association of short sleep duration with weight gain and obesity at 1-year follow-up: a large-scale prospective study. *Sleep*. 2010;33(2):161-7.
28. Lakerveld J, Mackenbach JD, Horvath E, Rutters F, Compernelle S, Bardos H, et al. The relation between sleep duration and sedentary behaviours in European adults. *Obesity reviews : an official journal of the International Association for the Study of Obesity*. 2016;17 Suppl 1:62-7.
29. Johns MW. A new method for measuring daytime sleepiness: the Epworth sleepiness scale. *Sleep*. 1991;14(6):540-5.

1  
2  
3  
4  
5  
6  
7  
8  
9  
10  
11  
12  
13  
14  
15  
16  
17  
18  
19  
20  
21  
22  
23  
24  
25  
26  
27  
28  
29  
30  
31  
32  
33  
34  
35  
36  
37  
38  
39  
40  
41  
42  
43  
44  
45  
46  
47  
48  
49  
50  
51  
52  
53  
54  
55  
56  
57  
58  
59  
60

30. Kleiser C, Wawro N, Stelmach-Mardas M, Boeing H, Gedrich K, Himmerich H, et al. Are sleep duration, midpoint of sleep and sleep quality associated with dietary intake among Bavarian adults? *European journal of clinical nutrition*. 2017;71(5):631-7.
31. Lima MG, Francisco PMSB, de Azevedo Barros MB. Sleep duration pattern and chronic diseases in Brazilian adults (ISACAMP, 2008/09). *Sleep medicine*. 2012;13(2):139-44.
32. Reis C, Dias S, Rodrigues AM, Sousa RD, Gregorio MJ, Branco J, et al. Sleep duration, lifestyles and chronic diseases: a cross-sectional population-based study. *Sleep science (Sao Paulo, Brazil)*. 2018;11(4):217-30.
33. Wang Y-M, Song M, Wang R, Shi L, He J, Fan T-T, et al. Insomnia and multimorbidity in the community elderly in China. *Journal of clinical sleep medicine: JCSM: official publication of the American Academy of Sleep Medicine*. 2017;13(4):591.
34. Marshall NS, Stranges S. Are sleep difficulties the “canary in the coalmine” for aortic calcification in women? *Sleep medicine*. 2013;14(5):389-90.
35. Onen SH, Onen F. Chronic Medical Conditions and Sleep in the Older Adult. *Sleep medicine clinics*. 2018;13(1):71-9.
36. Gangwisch J. Epidemiological evidence for the links between sleep, circadian rhythms and metabolism. *Obesity reviews*. 2009;10(s2):37-45.
37. Grandner MA, Petrov ME, Rattanaumpawan P, Jackson N, Platt A, Patel NP. Sleep symptoms, race/ethnicity, and socioeconomic position. *Journal of clinical sleep medicine : JCSM : official publication of the American Academy of Sleep Medicine*. 2013;9(9):897-905; a-d.
38. Jackson CL, Hu FB, Redline S, Williams DR, Mattei J, Kawachi I. Racial/ethnic disparities in short sleep duration by occupation: the contribution of immigrant status. *Social science & medicine (1982)*. 2014;118:71-9.
39. Vincent H, Noel PAM, Philippe VK. Measuring and accounting for the deprivation gap of Portuguese immigrants in Luxembourg. *LISER*; 2012.
40. Polo-Kantola P, Laine A, Kronholm E, Saarinen MM, Rautava P, Aromaa M, et al. Gender differences in actual and preferred nocturnal sleep duration among Finnish employed population. *Maturitas*. 2016;94:77-83.
41. Nugent CN, Black LI. Sleep Duration, Quality of Sleep, and Use of Sleep Medication, by Sex and Family Type, 2013-2014. *NCHS data brief*. 2016(230):1-8.
42. Kredlow MA, Capozzoli MC, Hearon BA, Calkins AW, Otto MW. The effects of physical activity on sleep: a meta-analytic review. *Journal of behavioral medicine*. 2015;38(3):427-49.
43. Cespedes EM, Hu FB, Redline S, Rosner B, Alcantara C, Cai J, et al. Comparison of Self-Reported Sleep Duration With Actigraphy: Results From the Hispanic Community Health Study/Study of Latinos Sueno Ancillary Study. *American journal of epidemiology*. 2016;183(6):561-73.
44. Matthews KA, Patel SR, Pantescio EJ, Buysse DJ, Kamarck TW, Lee L, et al. Similarities and differences in estimates of sleep duration by polysomnography, actigraphy, diary, and self-reported habitual sleep in a community sample. *Sleep health*. 2018;4(1):96-103.



**Table 1.** Chronic diseases/conditions, multimorbidity and sleep: European Health Examination Survey in Luxembourg (N =1508).

|                                                                        | N (%) / Mean $\pm$ SD |
|------------------------------------------------------------------------|-----------------------|
| Hypertension                                                           | 250 (16.59)           |
| High cholesterol                                                       | 458 (30.39)           |
| Diabetes                                                               | 69 (4.58)             |
| Coronary heart disease or angina pectoris                              | 26 (1.73)             |
| Myocardial infarction or chronic consequences of myocardial infarction | 14 (0.93)             |
| Stroke or chronic consequences of stroke                               | 11 (0.73)             |
| Stomach or duodenal ulcer                                              | 81 (5.37)             |
| Cirrhosis of the liver or other liver disease                          | 46 (3.05)             |
| Urinary incontinence, problems in controlling the bladder              | 74 (4.91)             |
| Kidney problems                                                        | 108 (7.17)            |
| Chronic low back disorder or other chronic back defect                 | 489 (32.47)           |
| Chronic neck disorder or other chronic neck defect                     | 246 (16.32)           |
| Rheumatoid arthritis                                                   | 88 (5.85)             |
| Arthrosis                                                              | 292 (19.38)           |
| Osteoporosis                                                           | 44 (2.92)             |
| Cancer                                                                 | 54 (3.59)             |
| Severe headache such as migraine                                       | 271 (17.98)           |
| Chronic anxiety                                                        | 98 (6.50)             |
| Depression                                                             | 204 (13.54)           |
| Number of chronic diseases                                             |                       |
| 0                                                                      | 405 (27.00)           |
| 1                                                                      | 362 (24.13)           |

|    |                                                            |               |
|----|------------------------------------------------------------|---------------|
| 1  |                                                            |               |
| 2  |                                                            |               |
| 3  | ≥2 (multimorbidity)                                        | 733 (49.00)   |
| 4  |                                                            |               |
| 5  | ≥3                                                         | 465 (31.00)   |
| 6  |                                                            |               |
| 7  |                                                            |               |
| 8  | Sleep                                                      |               |
| 9  |                                                            |               |
| 10 | Diagnosis of sleep disorder                                | 122 (8.21)    |
| 11 |                                                            |               |
| 12 | Sleepiness <sup>a</sup>                                    | 118 (7.89)    |
| 13 |                                                            |               |
| 14 | Have difficulties in sleeping the night through            | 510 (33.89)   |
| 15 |                                                            |               |
| 16 | Sleeping medication                                        | 64 (4.26)     |
| 17 |                                                            |               |
| 18 |                                                            |               |
| 19 | Sleep duration                                             |               |
| 20 |                                                            |               |
| 21 | Total sleep duration (N=1,170)                             |               |
| 22 |                                                            |               |
| 23 | <6hrs/night                                                | 60 (5.13%)    |
| 24 |                                                            |               |
| 25 | 6h-9hrs/night                                              | 1089 (93.08%) |
| 26 |                                                            |               |
| 27 | >9hrs/night                                                | 21 (1.79%)    |
| 28 |                                                            |               |
| 29 |                                                            |               |
| 30 | Hours when you have to work the next day (N=1,152-working) | 6.95±0.97     |
| 31 |                                                            |               |
| 32 | Hours when you don't work the next day (N=1,501)           | 7.86±1.30     |
| 33 |                                                            |               |
| 34 |                                                            |               |
| 35 |                                                            |               |

36  
37  
38 N=number, SD=standard deviation

39  
40 <sup>a</sup> Measured with Epworth Sleepiness Scale

41  
42  
43 Missing values ranged from 2 to 13 observations

**Table 2.** Participant characteristics by chronic conditions/diseases: European Health Examination Survey in Luxembourg (N =1508).

|                        | Chronic conditions/diseases |             |             |             | P <sup>a</sup> |
|------------------------|-----------------------------|-------------|-------------|-------------|----------------|
|                        | 0                           | 1           | 2           | ≥3          |                |
| Sex                    |                             |             |             |             |                |
| Men                    | 199 (27.72)                 | 199 (27.72) | 143 (19.92) | 177 (24.65) | <0.001         |
| Women                  | 206 (26.34)                 | 163 (20.84) | 125 (15.98) | 288 (36.83) |                |
| Age                    |                             |             |             |             |                |
| 25-34                  | 130 (43.62)                 | 86 (28.86)  | 48 (16.11)  | 34 (11.41)  | <0.001         |
| 35-44                  | 156 (34.29)                 | 119 (26.15) | 69 (15.16)  | 111 (24.40) |                |
| 45-54                  | 83 (18.16)                  | 111 (24.29) | 98 (21.44)  | 165 (36.11) |                |
| 55-64                  | 36 (12.41)                  | 46 (15.86)  | 53 (18.28)  | 155 (53.45) |                |
| Immigration            |                             |             |             |             |                |
| Luxembourg             | 184 (23.44)                 | 197 (25.10) | 144 (18.34) | 260 (33.12) | <0.001         |
| Portugal               | 52 (23.85)                  | 42 (19.27)  | 45 (20.64)  | 79 (36.24)  |                |
| Other                  | 169 (34.00)                 | 123 (24.75) | 79 (15.90)  | 126 (25.35) |                |
| Education              |                             |             |             |             |                |
| Primary                | 68 (18.38)                  | 75 (20.27)  | 64 (17.30)  | 163 (44.05) | <0.001         |
| Secondary              | 133 (23.05)                 | 142 (24.61) | 106 (18.37) | 196 (33.97) |                |
| Tertiary               | 203 (37.04)                 | 145 (26.46) | 97 (17.70)  | 103 (18.80) |                |
| Job                    |                             |             |             |             |                |
| Not working            | 58 (16.67)                  | 56 (16.09)  | 58 (16.67)  | 176 (50.57) | <0.001         |
| managers/professionals | 168 (35.59)                 | 138 (29.24) | 73 (15.47)  | 93 (19.70)  |                |

|    |                                         |              |              |              |              |        |
|----|-----------------------------------------|--------------|--------------|--------------|--------------|--------|
| 1  |                                         |              |              |              |              |        |
| 2  |                                         |              |              |              |              |        |
| 3  | technicians/clerical/service occupation | 119 (29.38)  | 89 (21.98)   | 76 (18.77)   | 121 (29.88)  |        |
| 4  |                                         |              |              |              |              |        |
| 5  | skilled/unskilled workers               | 60 (21.90)   | 79 (28.83)   | 61 (22.26)   | 74 (27.01)   |        |
| 6  |                                         |              |              |              |              |        |
| 7  |                                         |              |              |              |              |        |
| 8  | Smoking                                 |              |              |              |              |        |
| 9  |                                         |              |              |              |              |        |
| 10 | Never                                   | 239 (29.25)  | 209 (25.58)  | 145 (17.75)  | 224 (27.42)  | 0.026  |
| 11 |                                         |              |              |              |              |        |
| 12 | Current                                 | 90 (26.01)   | 75 (21.68)   | 63 (18.21)   | 118 (34.10)  |        |
| 13 |                                         |              |              |              |              |        |
| 14 | Ex-smoker                               | 74 (22.09)   | 78 (23.28)   | 60 (17.91)   | 123 (36.72)  |        |
| 15 |                                         |              |              |              |              |        |
| 16 |                                         |              |              |              |              |        |
| 17 | Alcohol                                 |              |              |              |              |        |
| 18 |                                         |              |              |              |              |        |
| 19 | Never                                   | 30 (27.78)   | 21 (19.44)   | 20 (18.52)   | 37 (34.26)   | 0.055  |
| 20 |                                         |              |              |              |              |        |
| 21 | Drinkers                                | 365 (27.53)  | 328 (24.74)  | 234 (17.65)  | 399 (30.09)  |        |
| 22 |                                         |              |              |              |              |        |
| 23 | Ex-drinkers                             | 8 (12.50)    | 13 (20.31)   | 14 (21.88)   | 29 (45.31)   |        |
| 24 |                                         |              |              |              |              |        |
| 25 |                                         |              |              |              |              |        |
| 26 | Fruits and vegetables consumption       |              |              |              |              |        |
| 27 |                                         |              |              |              |              |        |
| 28 | <1 portion/day                          | 126 (27.39)  | 112 (24.35)  | 87 (18.91)   | 135 (29.35)  | 0.597  |
| 29 |                                         |              |              |              |              |        |
| 30 | 1-4 portions/day                        | 223 (27.81)  | 183 (22.82)  | 142 (17.71)  | 254 (31.67)  |        |
| 31 |                                         |              |              |              |              |        |
| 32 | ≥5 portions/day                         | 55 (23.31)   | 66 (27.97)   | 39 (16.53)   | 76 (32.20)   |        |
| 33 |                                         |              |              |              |              |        |
| 34 |                                         |              |              |              |              |        |
| 35 | Physical Activity                       |              |              |              |              |        |
| 36 |                                         |              |              |              |              |        |
| 37 | Never                                   | 130 (21.35)  | 133 (21.84)  | 125 (20.53)  | 221 (36.29)  | <0.001 |
| 38 |                                         |              |              |              |              |        |
| 39 | ≤3h/week                                | 151 (29.84)  | 130 (25.69)  | 77 (15.22)   | 148 (29.25)  |        |
| 40 |                                         |              |              |              |              |        |
| 41 | >3h/week                                | 121 (31.84)  | 98 (25.79)   | 65 (17.11)   | 96 (25.26)   |        |
| 42 |                                         |              |              |              |              |        |
| 43 |                                         |              |              |              |              |        |
| 44 | BMI                                     | 25.27 ± 4.06 | 26.04 ± 4.89 | 26.66 ± 4.96 | 28.07 ± 5.56 | <0.001 |
| 45 |                                         |              |              |              |              |        |
| 46 | <25                                     | 212 (33.02)  | 169 (26.32)  | 112 (17.45)  | 149 (23.21)  | <0.001 |
| 47 |                                         |              |              |              |              |        |
| 48 | 25-30                                   | 152 (27.39)  | 131 (23.60)  | 100 (18.02)  | 172 (30.99)  |        |
| 49 |                                         |              |              |              |              |        |
| 50 | ≥30                                     | 41 (13.62)   | 61 (20.27)   | 55 (18.27)   | 144 (47.84)  |        |
| 51 |                                         |              |              |              |              |        |
| 52 |                                         |              |              |              |              |        |
| 53 |                                         |              |              |              |              |        |

54 Values are: numbers (%) for categorical variables and means±standard deviation for continuous  
 55 variables. BMI: Body Mass Index. <sup>a</sup>  $\chi^2$  test for categorical variables, t-test for continuous variables.  
 56  
 57

58 Missing values ranged from 8 to 13 observations.  
 59  
 60

**Table 3.** Participant's characteristics by Sleep duration: European Health Examination Survey in Luxembourg.

|                                         | Sleep duration<br>(N=1,170) |              |               | P <sup>a</sup> |
|-----------------------------------------|-----------------------------|--------------|---------------|----------------|
|                                         | <6hrs/night                 | 6-9hrs/night | >9hrs/night   |                |
| Sex                                     |                             |              |               |                |
| Men                                     | 35 (5.85)                   | 559 (93.48)  | 4 (0.67)      | 0.007          |
| Women                                   | 25 (4.37)                   | 530 (92.66)  | 17 (2.97)     |                |
| Age                                     | 44.88 ± 8.53                | 43.00 ± 9.04 | 42.11 ± 10.43 | 0.26           |
| 25-34                                   | 8 (3.03)                    | 251 (95.08)  | 5 (1.89)      | 0.50           |
| 35-44                                   | 22 (5.53)                   | 367 (92.21)  | 9 (2.26)      |                |
| 45-54                                   | 22 (5.70)                   | 360 (93.26)  | 4 (1.04)      |                |
| 55-64                                   | 8 (6.56)                    | 111 (90.98)  | 3 (2.46)      |                |
| Immigration                             |                             |              |               |                |
| Luxembourg                              | 23 (3.75)                   | 581 (94.78)  | 9 (1.47)      | 0.02           |
| Portugal                                | 17 (10.00)                  | 151 (88.82)  | 2 (1.18)      |                |
| Other                                   | 20 (5.17)                   | 357 (92.25)  | 10 (2.58)     |                |
| Education                               |                             |              |               |                |
| Primary                                 | 21 (8.90)                   | 212 (89.83)  | 3 (1.27)      | 0.007          |
| Secondary                               | 25 (5.81)                   | 395 (91.86)  | 10 (2.33)     |                |
| Tertiary                                | 14 (2.80)                   | 478 (95.60)  | 8 (1.60)      |                |
| Job                                     |                             |              |               |                |
| Not working                             | 0 (0.00)                    | 19 (95.00)   | 1 (5.00)      | 0.05           |
| managers/professionals                  | 15 (3.18)                   | 450 (95.34)  | 7 (1.48)      |                |
| technicians/clerical/service occupation | 23 (5.64)                   | 376 (92.16)  | 9 (2.21)      |                |
| skilled/unskilled workers               | 22 (8.15)                   | 244 (90.37)  | 4 (1.48)      |                |
| Smoking                                 |                             |              |               |                |
| Never                                   | 32 (4.79)                   | 625 (93.56)  | 11 (1.65)     | 0.84           |
| Current                                 | 15 (5.60)                   | 249 (92.91)  | 4 (1.49)      |                |
| Ex-smoker                               | 13 (5.58)                   | 214 (91.85)  | 6 (2.58)      |                |
| Alcohol                                 |                             |              |               |                |
| Never                                   | 4 (5.63)                    | 63 (88.73)   | 4 (5.63)      | 0.03           |
| Drinkers                                | 52 (4.89)                   | 996 (93.61)  | 16 (1.50)     |                |
| Ex-drinkers                             | 4 (11.43)                   | 30 (85.71)   | 1 (2.86)      |                |
| Fruits and vegetables consumption       |                             |              |               |                |
| <1 portion/day                          | 19 (5.04)                   | 351 (93.10)  | 7 (1.86)      | 0.72           |
| 1-4 portions/day                        | 36 (5.76)                   | 578 (92.48)  | 11 (1.76)     |                |
| ≥5 portions/day                         | 5 (2.99)                    | 159 (95.21)  | 3 (1.80)      |                |
| Physical Activity                       |                             |              |               |                |
| Never                                   | 36 (7.81)                   | 413 (89.59)  | 12 (2.60)     | 0.003          |
| ≤3h/week                                | 12 (2.86)                   | 401 (95.48)  | 7 (1.67)      |                |

|     |          |              |              |              |       |
|-----|----------|--------------|--------------|--------------|-------|
|     | >3h/week | 12 (4.15)    | 275 (95.16)  | 2 (0.69)     |       |
| BMI |          | 27.57 ± 4.80 | 26.36 ± 4.87 | 25.27 ± 6.53 | 0.10  |
|     | <25      | 16 (3.16)    | 477 (94.27)  | 13 (2.57)    | 0.003 |
|     | 25-30    | 30 (6.80)    | 409 (92.74)  | 2 (0.45)     |       |
|     | ≥30      | 14 (6.31)    | 202 (90.99)  | 6 (2.70)     |       |

Values are: numbers (%) for categorical variables and means±standard deviation for continuous variables. BMI: Body Mass Index. NA: not available.

<sup>a</sup>  $\chi^2$  test or Fisher's exact test for categorical variables, ANOVA for continuous variables.

For peer review only

**Table 4.** Results of multinomial logistic regression measuring the association between sleep duration and chronic conditions in models adjusted for participants sociodemographic characteristics, behavioural risk factors and measures of sleep disorders and sleep quality: European Health Examination Survey in Luxembourg (N=1,170).

|                                         | Sleep duration           |                          |                  |                          |
|-----------------------------------------|--------------------------|--------------------------|------------------|--------------------------|
|                                         | Short (<6h)              |                          | Long (>9h)       |                          |
|                                         | OR (95% CI)              | AOR (95% CI)             | OR (95% CI)      | AOR (95% CI)             |
| Chronic conditions/diseases             |                          |                          |                  |                          |
| 0                                       | 1.00                     | 1.00                     | 1.00             | 1.00                     |
| 1                                       | <b>4.55 (1.49-13.88)</b> | <b>4.65 (1.48-14.51)</b> | 2.94 (0.93-9.19) | 2.66 (0.80-8.85)         |
| 2                                       | <b>7.65 (2.55-22.91)</b> | <b>7.30 (2.35-22.58)</b> | 0.86 (0.16-4.54) | 0.82 (0.14-4.67)         |
| ≥3                                      | <b>9.45 (3.25-27.41)</b> | <b>6.79 (2.15-21.41)</b> | 1.27 (0.31-5.24) | 0.73 (0.13-3.88)         |
| Immigration                             |                          |                          |                  |                          |
| Luxembourg                              |                          | 1.00                     |                  | 1.00                     |
| Portugal                                |                          | 1.66 (0.71-3.89)         |                  | 0.86 (0.14-5.08)         |
| Other                                   |                          | <b>1.96 (1.00-3.82)</b>  |                  | 1.80 (0.61-5.31)         |
| Sex                                     |                          |                          |                  |                          |
| Men                                     |                          | 1.00                     |                  | 1.00                     |
| Women                                   |                          | <b>0.48 (0.24-0.93)</b>  |                  | <b>4.57 (1.22-17.09)</b> |
| Age                                     |                          | 0.99 (0.95-1.02)         |                  | 0.98 (0.93-1.04)         |
| Education                               |                          |                          |                  |                          |
| Primary                                 |                          | 1.00                     |                  | 1.00                     |
| Secondary                               |                          | 0.77 (0.35-1.71)         |                  | 1.79 (0.36-8.85)         |
| Tertiary                                |                          | 0.36 (0.12-1.11)         |                  | 1.07 (0.14-7.85)         |
| Job status                              |                          |                          |                  |                          |
| Unemployed                              |                          |                          |                  |                          |
| managers/professionals                  |                          | 1.00                     |                  | 1.00                     |
| technicians/clerical/service occupation |                          | 1.17 (0.50-2.68)         |                  | 1.47 (0.40-5.39)         |

|    |                                    |                         |                   |
|----|------------------------------------|-------------------------|-------------------|
| 1  |                                    |                         |                   |
| 2  | skilled/unskilled workers          | 0.96 (0.36-2.55)        | 2.00 (0.33-11.91) |
| 3  | Physical Activity                  |                         |                   |
| 4  | Never                              | 1.00                    | 1.00              |
| 5  | ≤3h/week                           | <b>0.47 (0.22-0.98)</b> | 0.33 (0.10-1.09)  |
| 6  | >3h/week                           | 0.73 (0.34-1.56)        | 0.23 (0.04-1.08)  |
| 7  |                                    |                         |                   |
| 8  | BMI                                |                         |                   |
| 9  | Normal                             | 1.00                    | 1.00              |
| 10 | Overweight                         | 1.49 (0.74-2.98)        | 0.29 (0.06-1.39)  |
| 11 | Obese                              | 0.94 (0.40-2.16)        | 1.25 (0.35-4.40)  |
| 12 | Smoking                            |                         |                   |
| 13 | Never                              | 1.00                    | 1.00              |
| 14 | Current                            | 0.92 (0.46-1.84)        | 1.13 (0.30-4.15)  |
| 15 | Ex-smokers                         | 0.88 (0.42-1.86)        | 3.30 (0.98-11.00) |
| 16 | Alcohol consumption                |                         |                   |
| 17 | Never                              | 1.00                    | 1.00              |
| 18 | Drink                              | 2.21 (0.39-12.48)       | 0.60 (0.05-7.13)  |
| 19 | Ex-drinker                         | 1.14 (0.31-4.10)        | 0.32 (0.07-1.44)  |
| 20 | Sleeping medication                | 1.89 (0.56-6.35)        | NA                |
| 21 | Sleep disorder diagnosis           | 1.39 (0.55-3.49)        | NA                |
| 22 | Difficulties in sleeping the night | <b>2.12 (1.14-3.92)</b> | 1.34 (0.45-3.90)  |
| 23 | Sleepiness                         | <b>3.37 (1.57-7.21)</b> | 1.09 (0.20-5.77)  |
| 24 |                                    |                         |                   |
| 25 |                                    |                         |                   |
| 26 |                                    |                         |                   |
| 27 |                                    |                         |                   |
| 28 |                                    |                         |                   |
| 29 |                                    |                         |                   |

Note. OR: Odds ratio; AOR: Ajusted Odds ratio; 95% CI: 95% confidence interval.



1  
2  
3  
4  
5  
6  
7  
8  
9  
10  
11  
12  
13  
14  
15  
16  
17  
18  
19  
20  
21  
22  
23  
24  
25  
26  
27  
28  
29  
30  
31  
32  
33  
34  
35  
36  
37  
38  
39  
40  
41  
42  
43  
44  
45  
46

For peer review only

**Supplementary Table S1.** Sleep problems and duration by chronic conditions/diseases: European Health Examination Survey in Luxembourg.

| Variables                                                | Chronic diseases /conditions |             |             |             |             | P      |
|----------------------------------------------------------|------------------------------|-------------|-------------|-------------|-------------|--------|
|                                                          | Total                        | 0           | 1           | 2           | ≥3          |        |
| Diagnosis of sleep disorder (N=1486)                     | 122 (8.21)                   | 11 (9.02)   | 13 (10.66)  | 22 (18.03)  | 76 (62.30)  | <0.001 |
| Sleepiness                                               | 118 (7.89)                   | 25 (21.19)  | 26 (22.03)  | 18 (15.25)  | 49 (41.53)  | 0.071  |
| Have difficulties in sleeping the night through (N=1505) | 510 (33.89)                  | 84 (16.63)  | 79 (15.64)  | 93 (18.42)  | 249 (49.31) |        |
| <b>Sleep duration</b>                                    |                              |             |             |             |             |        |
| Num sleep hours when you have to work the next day       |                              |             |             |             |             |        |
| (N=1,152-working)                                        |                              |             |             |             |             |        |
| <6h                                                      | 70 (6.08)                    | 10 (14.29)  | 13 (18.57)  | 19 (27.14)  | 28 (40.00)  | 0.006  |
| 6-7h                                                     | 761 (66.06)                  | 232 (30.73) | 206 (27.28) | 133 (17.62) | 184 (24.37) |        |
| ≥8h                                                      | 321 (27.86)                  | 103 (32.09) | 87 (27.10)  | 56 (17.45)  | 75 (23.36)  |        |
| Num sleep hours when you do NOT work the next day        |                              |             |             |             |             |        |
| (N=1,501)                                                |                              |             |             |             |             |        |
| ≤6h                                                      | 203 (13.52)                  | 25 (12.38)  | 34 (16.83)  | 43 (21.29)  | 100 (49.50) | <0.001 |
| 7-8h                                                     | 878 (58.49)                  | 245 (28.00) | 227 (25.94) | 150 (17.14) | 253 (28.91) |        |
| >8h                                                      | 420 (27.98)                  | 133 (31.89) | 100 (23.98) | 75 (17.99)  | 109 (26.14) |        |

1  
2  
3  
4 Values are: numbers (%) <sup>a</sup>  $\chi^2$  test for categorical variable  
5  
6  
7  
8  
9  
10  
11  
12  
13  
14  
15  
16  
17  
18  
19  
20  
21  
22  
23  
24  
25  
26  
27  
28  
29  
30  
31  
32  
33  
34  
35  
36  
37  
38  
39  
40  
41  
42  
43  
44  
45  
46

For peer review only

1  
2  
3  
4  
5  
6  
7  
8  
9  
10  
11  
12  
13  
14  
15  
16  
17  
18  
19  
20  
21  
22  
23  
24  
25  
26  
27  
28  
29  
30  
31  
32  
33  
34  
35  
36  
37  
38  
39  
40  
41  
42  
43  
44  
45  
46

For peer review only

STROBE Statement—Checklist of items that should be included in reports of *cross-sectional studies*

|                              | Item No | Recommendation                                                                                                                                                                                               | Page No       |
|------------------------------|---------|--------------------------------------------------------------------------------------------------------------------------------------------------------------------------------------------------------------|---------------|
| <b>Title and abstract</b>    | 1       | (a) Indicate the study's design with a commonly used term in the title or the abstract                                                                                                                       | 3             |
|                              |         | (b) Provide in the abstract an informative and balanced summary of what was done and what was found                                                                                                          | 3             |
| <b>Introduction</b>          |         |                                                                                                                                                                                                              |               |
| Background/rationale         | 2       | Explain the scientific background and rationale for the investigation being reported                                                                                                                         | 5             |
| Objectives                   | 3       | State specific objectives, including any prespecified hypotheses                                                                                                                                             | 6             |
| <b>Methods</b>               |         |                                                                                                                                                                                                              |               |
| Study design                 | 4       | Present key elements of study design early in the paper                                                                                                                                                      | 6             |
| Setting                      | 5       | Describe the setting, locations, and relevant dates, including periods of recruitment, exposure, follow-up, and data collection                                                                              | 6             |
| Participants                 | 6       | (a) Give the eligibility criteria, and the sources and methods of selection of participants                                                                                                                  | 6             |
| Variables                    | 7       | Clearly define all outcomes, exposures, predictors, potential confounders, and effect modifiers. Give diagnostic criteria, if applicable                                                                     | 6-7           |
| Data sources/<br>measurement | 8*      | For each variable of interest, give sources of data and details of methods of assessment (measurement). Describe comparability of assessment methods if there is more than one group                         | 6-7           |
| Bias                         | 9       | Describe any efforts to address potential sources of bias                                                                                                                                                    | 8, 12         |
| Study size                   | 10      | Explain how the study size was arrived at                                                                                                                                                                    | 6             |
| Quantitative variables       | 11      | Explain how quantitative variables were handled in the analyses. If applicable, describe which groupings were chosen and why                                                                                 | 6-8           |
| Statistical methods          | 12      | (a) Describe all statistical methods, including those used to control for confounding                                                                                                                        | 8             |
|                              |         | (b) Describe any methods used to examine subgroups and interactions                                                                                                                                          |               |
|                              |         | (c) Explain how missing data were addressed                                                                                                                                                                  | 8             |
|                              |         | (d) If applicable, describe analytical methods taking account of sampling strategy                                                                                                                           |               |
|                              |         | (e) Describe any sensitivity analyses                                                                                                                                                                        |               |
| <b>Results</b>               |         |                                                                                                                                                                                                              |               |
| Participants                 | 13*     | (a) Report numbers of individuals at each stage of study—eg numbers potentially eligible, examined for eligibility, confirmed eligible, included in the study, completing follow-up, and analysed            | 6             |
|                              |         | (b) Give reasons for non-participation at each stage                                                                                                                                                         |               |
|                              |         | (c) Consider use of a flow diagram                                                                                                                                                                           |               |
| Descriptive data             | 14*     | (a) Give characteristics of study participants (eg demographic, clinical, social) and information on exposures and potential confounders                                                                     | Table 2 and 3 |
|                              |         | (b) Indicate number of participants with missing data for each variable of interest                                                                                                                          |               |
| Outcome data                 | 15*     | Report numbers of outcome events or summary measures                                                                                                                                                         | 8             |
| Main results                 | 16      | (a) Give unadjusted estimates and, if applicable, confounder-adjusted estimates and their precision (eg, 95% confidence interval). Make clear which confounders were adjusted for and why they were included | Table 4       |

|                          |    |                                                                                                                                                                            |      |
|--------------------------|----|----------------------------------------------------------------------------------------------------------------------------------------------------------------------------|------|
|                          |    | (b) Report category boundaries when continuous variables were categorized                                                                                                  | 7-8  |
|                          |    | (c) If relevant, consider translating estimates of relative risk into absolute risk for a meaningful time period                                                           |      |
| Other analyses           | 17 | Report other analyses done—eg analyses of subgroups and interactions, and sensitivity analyses                                                                             |      |
| <b>Discussion</b>        |    |                                                                                                                                                                            |      |
| Key results              | 18 | Summarise key results with reference to study objectives                                                                                                                   | 9    |
| Limitations              | 19 | Discuss limitations of the study, taking into account sources of potential bias or imprecision. Discuss both direction and magnitude of any potential bias                 | 11   |
| Interpretation           | 20 | Give a cautious overall interpretation of results considering objectives, limitations, multiplicity of analyses, results from similar studies, and other relevant evidence | 9-11 |
| Generalisability         | 21 | Discuss the generalisability (external validity) of the study results                                                                                                      | 12   |
| <b>Other information</b> |    |                                                                                                                                                                            |      |
| Funding                  | 22 | Give the source of funding and the role of the funders for the present study and, if applicable, for the original study on which the present article is based              | 6    |

\*Give information separately for exposed and unexposed groups.

**Note:** An Explanation and Elaboration article discusses each checklist item and gives methodological background and published examples of transparent reporting. The STROBE checklist is best used in conjunction with this article (freely available on the Web sites of PLoS Medicine at <http://www.plosmedicine.org/>, Annals of Internal Medicine at <http://www.annals.org/>, and Epidemiology at <http://www.epidem.com/>). Information on the STROBE Initiative is available at [www.strobe-statement.org](http://www.strobe-statement.org).
