# Supplementary material for: Sleep duration and multimorbidity in Luxembourg: results from the European Health Examination Survey in Luxembourg, 2013–2015
Source: PubMed Central journal article supplement — BMJ Open. 2019 Aug 21;9(8):e026942. doi: 10.1136/bmjopen-2018-026942 (PMC6707670; doi:10.1136/bmjopen-2018-026942), 2019-08-21
Supplement: bmjopen-2018-026942supp001.pdf [file bmjopen-2018-026942supp001.pdf]

**Supplementary Table S1.** Sleep problems and duration by chronic conditions/diseases: European Health Examination Survey in Luxembourg.

| Variables                                                | Total       | Chronic diseases /conditions |             |             |             | P      |
|----------------------------------------------------------|-------------|------------------------------|-------------|-------------|-------------|--------|
|                                                          |             | 0                            | 1           | 2           | ≥3          |        |
| Diagnosis of sleep disorder (N=1486)                     | 122 (8.21)  | 11 (9.02)                    | 13 (10.66)  | 22 (18.03)  | 76 (62.30)  | <0.001 |
| Sleepiness                                               | 118 (7.89)  | 25 (21.19)                   | 26 (22.03)  | 18 (15.25)  | 49 (41.53)  | 0.071  |
| Have difficulties in sleeping the night through (N=1505) | 510 (33.89) | 84 (16.63)                   | 79 (15.64)  | 93 (18.42)  | 249 (49.31) |        |
| Sleep duration                                           |             |                              |             |             |             |        |
| Num sleep hours when you have to work the next day       |             |                              |             |             |             |        |
| (N=1,152-working)                                        |             |                              |             |             |             |        |
| <6h                                                      | 70 (6.08)   | 10 (14.29)                   | 13 (18.57)  | 19 (27.14)  | 28 (40.00)  | 0.006  |
| 6-7h                                                     | 761 (66.06) | 232 (30.73)                  | 206 (27.28) | 133 (17.62) | 184 (24.37) |        |
| ≥8h                                                      | 321 (27.86) | 103 (32.09)                  | 87 (27.10)  | 56 (17.45)  | 75 (23.36)  |        |
| Num sleep hours when you do NOT work the next day        |             |                              |             |             |             |        |
| (N=1,501)                                                |             |                              |             |             |             |        |
| ≤6h                                                      | 203 (13.52) | 25 (12.38)                   | 34 (16.83)  | 43 (21.29)  | 100 (49.50) | <0.001 |
| 7-8h                                                     | 878 (58.49) | 245 (28.00)                  | 227 (25.94) | 150 (17.14) | 253 (28.91) |        |
| >8h                                                      | 420 (27.98) | 133 (31.89)                  | 100 (23.98) | 75 (17.99)  | 109 (26.14) |        |

Values are: numbers (%) <sup>a</sup>  $\chi^2$  test for categorical variable
